# Supplementary material for: CtD strategy to construct stereochemically complex and structurally diverse compounds from griseofulvin
Source: Royal Society of Chemistry journal article supplement (doi:10.1039/d1cc04007c), 2021-01-01
Supplement: d1cc04007c1.pdf [file d1cc04007c1.pdf]

## **Supporting information**

### **CtD Strategy to Construct Stereochemically Complex and Structurally Diverse Compounds from Griseofulvin**

## Contents

|                                                                                                                                                     |      |
|-----------------------------------------------------------------------------------------------------------------------------------------------------|------|
| <b>General experimental information</b> .....                                                                                                       | 2    |
| <b>Optimization and proposed mechanism of schmidt reaction for griseofulvin</b> .....                                                               | 3    |
| <b>Optimization of oxidation reaction for griseofulvin</b> .....                                                                                    | 5    |
| <b>Optimization and proposed mechanism of cascade Tsuji-Trost allylation and Oxa-Michael cyclization for griseofulvin and pyranone esters</b> ..... | 7    |
| <b>General procedure for preparation of pyranones esters</b> .....                                                                                  | 9    |
| <b>Synthetic procedures and characterization data of all synthesized products</b> .....                                                             | 10   |
| <b>NMR spectra and X-ray data</b> .....                                                                                                             | 58   |
| <b>References</b> .....                                                                                                                             | 1099 |

### General experimental information

All chemicals and solvents used in the experiments were obtained from commercial sources and used directly without further purification. The organic solvents were treated following standard procedures before use.  $^1\text{H}$  NMR and  $^{13}\text{C}$  NMR spectra were recorded on a 400 MHz Bruker Biospin Avance III FT-NMR spectrometer. NMR shifts are reported as delta ( $\delta$ ) units in parts per million (ppm) and coupling constants ( $J$ ) are reported in Hertz (Hz). The following abbreviations are utilized to describe peak patterns when appropriate: br=broad, s=single, d=doublet, t=triplet, q=quartet and m=multiplet. Proton chemical shifts are given in  $\delta$  relative to tetramethylsilane ( $\delta$  0.00 ppm) in  $\text{CDCl}_3$  or to the residual proton signals of the deuterated solvent in  $\text{CD}_3\text{OD}$  ( $\delta$  3.31 ppm), in  $(\text{CD}_3)_2\text{SO}$  ( $\delta$  2.50 ppm), in  $(\text{CD}_3)_2\text{CO}$  ( $\delta$  2.05 ppm). Carbon chemical shifts are internally referenced to the deuterated solvent signals in  $\text{CDCl}_3$  ( $\delta$  77.1 ppm) or  $\text{CD}_3\text{OD}$  ( $\delta$  49.1 ppm) or  $(\text{CD}_3)_2\text{SO}$  ( $\delta$  39.5) or  $(\text{CD}_3)_2\text{CO}$  ( $\delta$  29.9 and 206.7). HMRS data for new compounds were acquired in the mass spectrometer equipped with TOF analyzer.

## Optimization and proposed mechanism of schmidt reaction for griseofulvin

**Table S1.** Optimization of schmidt reaction for griseofulvin.

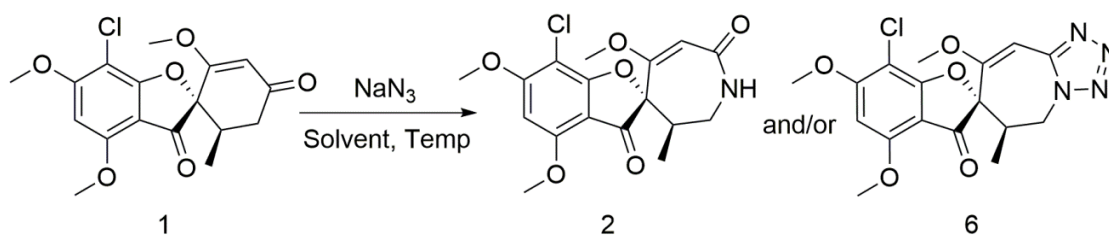

| Entry <sup>[a]</sup>  | Solvent                        | NaN <sub>3</sub> (eq.) | T (°C) | Yield (%) | 2:6 <sup>[b]</sup> |
|-----------------------|--------------------------------|------------------------|--------|-----------|--------------------|
| 1                     | CCl <sub>3</sub> COOH          | 1                      | 65     | 7         | 0:10               |
| 2                     | CCl <sub>3</sub> COOH          | 2                      | 65     | 12        | 0:10               |
| 3                     | CCl <sub>3</sub> COOH          | 5                      | 65     | 39        | 0:10               |
| 4                     | CF <sub>3</sub> COOH           | 1                      | 65     | 9         | 0:10               |
| 5                     | CF <sub>3</sub> COOH           | 2                      | 65     | 16        | 0:10               |
| 6                     | CF <sub>3</sub> COOH           | 5                      | 65     | 41        | 0:10               |
| 7                     | CF <sub>3</sub> COOH           | 2                      | r.t.   | 67        | 5.7:4.3            |
| 8 <sup>[c]</sup>      | CF <sub>3</sub> COOH           | 5                      | r.t.   | 71        | 4.1:5.9            |
| 9                     | CF <sub>3</sub> COOH           | 2                      | 0      | 15        | 6.3:2.7            |
| 10 <sup>[c]</sup>     | CF <sub>3</sub> COOH           | 5                      | 0      | 36        | 3.3:6.7            |
| 11 <sup>[c],[d]</sup> | MeSO <sub>3</sub> H            | 5                      | r.t.   | 61        | 4.9:5.1            |
| 12 <sup>[c],[e]</sup> | H <sub>2</sub> SO <sub>4</sub> | 5                      | r.t.   | 42        | 0:10               |
| 13 <sup>[f]</sup>     | CF <sub>3</sub> COOH           | 2                      | r.t.   | 65        | 5.2:4.8            |
| 14 <sup>[c],[f]</sup> | CF <sub>3</sub> COOH           | 5                      | r.t.   | 73        | 3.9:6.1            |
| 15 <sup>[g]</sup>     | CF <sub>3</sub> COOH           | 2                      | r.t.   | 23        | 10:0               |
| 16 <sup>[c],[g]</sup> | CF <sub>3</sub> COOH           | 5                      | r.t.   | 48        | 10:0               |

<sup>[a]</sup>Unless otherwise noted, Griseofulvin **1** (176 mg, 0.5 mmol) was dissolved in solvent (2 ml), stirred overnight. Followed by addition of NaN<sub>3</sub>. <sup>[b]</sup>Ratio determined from isolated yields <sup>[c]</sup>Dropwise addition of NaN<sub>3</sub>. <sup>[d]</sup>Reaction performed in MeSO<sub>3</sub>H/DCM (v/v=1/1

2ml). <sup>[c]</sup>Reaction performed at 0 °C while adding NaN<sub>3</sub>. <sup>[f]</sup>Reaction stir for an additional 12 hours. <sup>[g]</sup>Reaction performed in solvent (2 ml), followed by addition of water (10 μl).

**Scheme S1.** Proposed mechanism of schmidt reaction for griseofulvin.

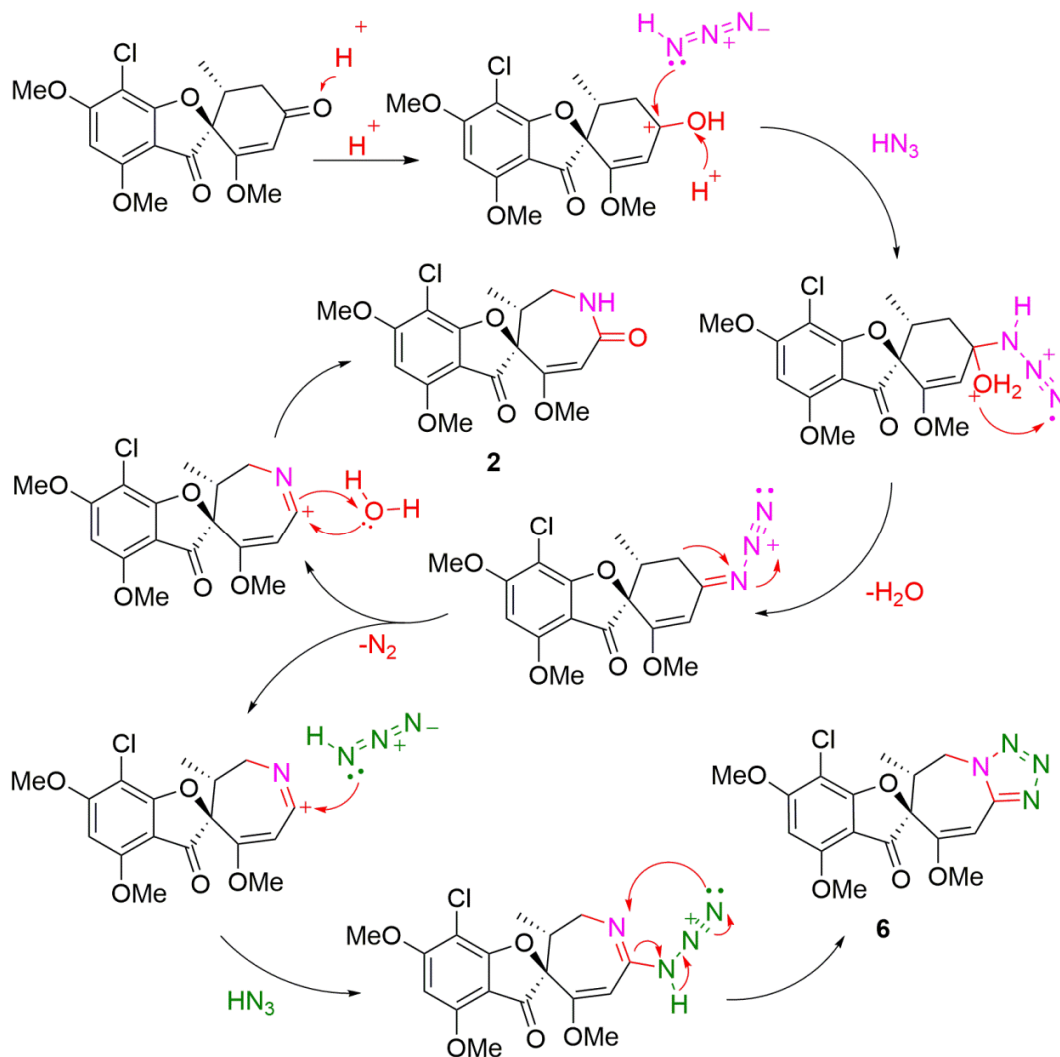

## Optimization of oxidation reaction for griseofulvin

**Table S2.** Optimization of oxidation reaction for griseofulvin.

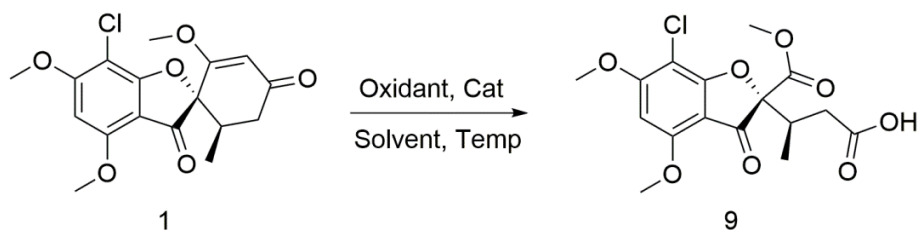

| Entry <sup>[a]</sup>  | Solvent                                               | Oxidant           | Catalyst                       | T (°C) | Yield (%) |
|-----------------------|-------------------------------------------------------|-------------------|--------------------------------|--------|-----------|
| 1                     | H <sub>2</sub> O                                      | NaIO <sub>4</sub> | KMnO <sub>4</sub>              | reflux | 0         |
| 2                     | <i>i</i> -PrOH                                        | NaIO <sub>4</sub> | KMnO <sub>4</sub>              | reflux | 0         |
| 3                     | <i>t</i> -BuOH                                        | NaIO <sub>4</sub> | KMnO <sub>4</sub>              | reflux | 0         |
| 4 <sup>[b]</sup>      | CH <sub>3</sub> CN/H <sub>2</sub> O                   | Oxone             | —                              | r.t.   | 0         |
| 5                     | DCE                                                   | Oxone             | Al <sub>2</sub> O <sub>3</sub> | reflux | 0         |
| 6                     | EtOAc                                                 | Oxone             | Al <sub>2</sub> O <sub>3</sub> | r.t.   | 0         |
| 7 <sup>[c]</sup>      | MeOH/H <sub>2</sub> O                                 | Oxone             | —                              | r.t.   | 0         |
| 8                     | DCM                                                   | mCPBA             | —                              | r.t.   | 0         |
| 9 <sup>[c], [d]</sup> | DCE/H <sub>2</sub> O                                  | NaIO <sub>4</sub> | RuCl <sub>3</sub>              | r.t.   | 0         |
| 10 <sup>[e]</sup>     | DCM/CH <sub>3</sub> CN/H <sub>2</sub> O               | NaIO <sub>4</sub> | RuCl <sub>3</sub>              | r.t.   | 0         |
| 11                    | EtOAc/CH <sub>3</sub> CN/H <sub>2</sub> O             | NaIO <sub>4</sub> | RuCl <sub>3</sub>              | r.t.   | 0         |
| 12                    | THF/CH <sub>3</sub> CN/H <sub>2</sub> O               | NaIO <sub>4</sub> | RuCl <sub>3</sub>              | r.t.   | 0         |
| 13                    | CCl <sub>4</sub> /CH <sub>3</sub> CN/H <sub>2</sub> O | NaIO <sub>4</sub> | RuCl <sub>3</sub>              | r.t.   | 0         |
| 14 <sup>[f]</sup>     | CH <sub>3</sub> CN/H <sub>2</sub> O                   | NaIO <sub>4</sub> | RuCl <sub>3</sub>              | r.t.   | 17        |
| 15 <sup>[g]</sup>     | CH <sub>3</sub> CN/H <sub>2</sub> O                   | NaIO <sub>4</sub> | RuCl <sub>3</sub>              | r.t.   | 19        |
| 16 <sup>[h]</sup>     | CH <sub>3</sub> CN/H <sub>2</sub> O                   | NaIO <sub>4</sub> | RuCl <sub>3</sub>              | r.t.   | 17        |
| 17 <sup>[i]</sup>     | CH <sub>3</sub> CN/H <sub>2</sub> O                   | NaIO <sub>4</sub> | RuCl <sub>3</sub>              | r.t.   | 18        |
| 18                    | CH <sub>3</sub> CN/H <sub>2</sub> O                   | NaIO <sub>4</sub> | RuCl <sub>3</sub>              | 60     | 42        |
| 19 <sup>[j]</sup>     | CH <sub>3</sub> CN/H <sub>2</sub> O                   | NaIO <sub>4</sub> | RuCl <sub>3</sub>              | 60     | 83        |
| 20                    | CH <sub>3</sub> CN/H <sub>2</sub> O                   | NaIO <sub>4</sub> | RuCl <sub>3</sub>              | reflux | 67        |

<sup>[a]</sup>Unless otherwise noted, Griseofulvin **1** (176 mg, 0.5 mmol) was dissolved in solvent, then add oxidant (5 eq, 2.5 mmol) and catalyst (5% mol, 0.025 mmol). The mixture was stirred for 6h. <sup>[b]</sup>The ratio of the solvents is 10:1. <sup>[c]</sup>The ratio of the solvents is 1:1. <sup>[d]</sup>In entry 9-20, Griseofulvin **1** (176 mg, 0.5 mmol) was dissolved in solvent, then add NaIO<sub>4</sub> (1.5 eq, 0.75 mmol) and RuCl<sub>3</sub> (3% mol, 0.015 mmol). The mixture was stirred for 6h. <sup>[e]</sup>In entry 10-13, the ratio of the solvents is 2:2:3. <sup>[f]</sup>In entry 14-20, the ratio of the solvents is 6:1. <sup>[g]</sup>Oxidant added NaIO<sub>4</sub> (3 eq, 1.5 mmol). <sup>[h]</sup>Oxidant added NaIO<sub>4</sub> (5 eq, 2.5 mmol). <sup>[i]</sup>Catalyst added RuCl<sub>3</sub> (5% mol, 0.025 mmol). <sup>[j]</sup>Reaction stir overnight.

**Optimization and proposed mechanism of cascade Tsuji-Trost allylation and Oxa-Michael cyclization for griseofulvin and pyranone esters**

**Table S3.** Optimization of cascade Tsuji-Trost allylation and Oxa-Michael cyclization for griseofulvin and Pyranone esters.

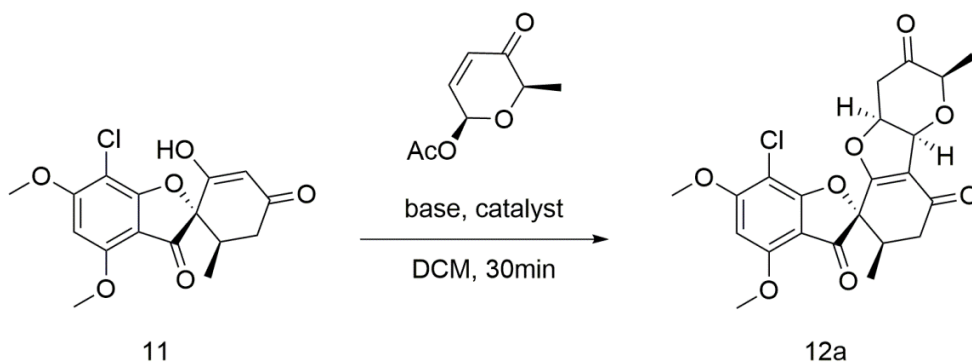

| Entry <sup>[a]</sup> | Base                            | Catalyst                           | T (°C) | Yield (%) | <i>cis:trans</i> <sup>[b]</sup> |
|----------------------|---------------------------------|------------------------------------|--------|-----------|---------------------------------|
| 1                    | Et <sub>3</sub> N               | Pd(PPh <sub>3</sub> ) <sub>4</sub> | r.t.   | 67        | >30:1                           |
| 2                    | DBU                             | Pd(PPh <sub>3</sub> ) <sub>4</sub> | r.t.   | 60        | >30:1                           |
| 3                    | K <sub>2</sub> CO <sub>3</sub>  | Pd(PPh <sub>3</sub> ) <sub>4</sub> | r.t.   | trace     | >30:1                           |
| 4                    | Cs <sub>2</sub> CO <sub>3</sub> | Pd(PPh <sub>3</sub> ) <sub>4</sub> | r.t.   | trace     | >30:1                           |
| 5                    | pyridine                        | Pd(PPh <sub>3</sub> ) <sub>4</sub> | r.t.   | 58        | >30:1                           |
| 6                    | <i>t</i> -BuOK                  | Pd(PPh <sub>3</sub> ) <sub>4</sub> | r.t.   | trace     | >30:1                           |
| 7                    | Et <sub>3</sub> N               | Pd(OAc) <sub>2</sub>               | r.t.   | 42        | >30:1                           |
| 8                    | Et <sub>3</sub> N               | PdCl <sub>2</sub>                  | r.t.   | trace     | >30:1                           |
| 9                    | Et <sub>3</sub> N               | Pd <sub>2</sub> (dba) <sub>3</sub> | r.t.   | 27        | >30:1                           |
| 10                   | Et <sub>3</sub> N               | Pd(PPh <sub>3</sub> ) <sub>4</sub> | reflux | 67        | >30:1                           |
| 11                   | Et <sub>3</sub> N               | Pd(PPh <sub>3</sub> ) <sub>4</sub> | 0      | 61        | >30:1                           |
| 12 <sup>[c]</sup>    | Et <sub>3</sub> N               | Pd(PPh <sub>3</sub> ) <sub>4</sub> | r.t.   | 36        | >30:1                           |
| 13 <sup>[d]</sup>    | Et <sub>3</sub> N               | Pd(PPh <sub>3</sub> ) <sub>4</sub> | r.t.   | 58        | >30:1                           |

<sup>[a]</sup>Unless otherwise noted, Compound **11** (37 mg, 0.11 mmol) was dissolved in anhydrous DCM (1 mL), add catalyst (0.011 mmol) and base (0.11 mmol), then add 17 mg (0.11 mmol) of (2*S*,6*R*)-6-methyl-5-oxo-5,6-dihydro-2*H*-pyran-2-yl acetate. The resulting

mixture was stirred at room temperature for 30 min. <sup>[b]</sup>Ratio was determined by GC-MS analysis of the crude reaction mixture. <sup>[c]</sup>Reaction performed in THF instead of DCM. <sup>[d]</sup>Reaction performed in Tol instead of DCM.

**Scheme S2.** Proposed mechanism of cascade Tsuji-Trost allylation and Oxa-Michael cyclization.<sup>1</sup>

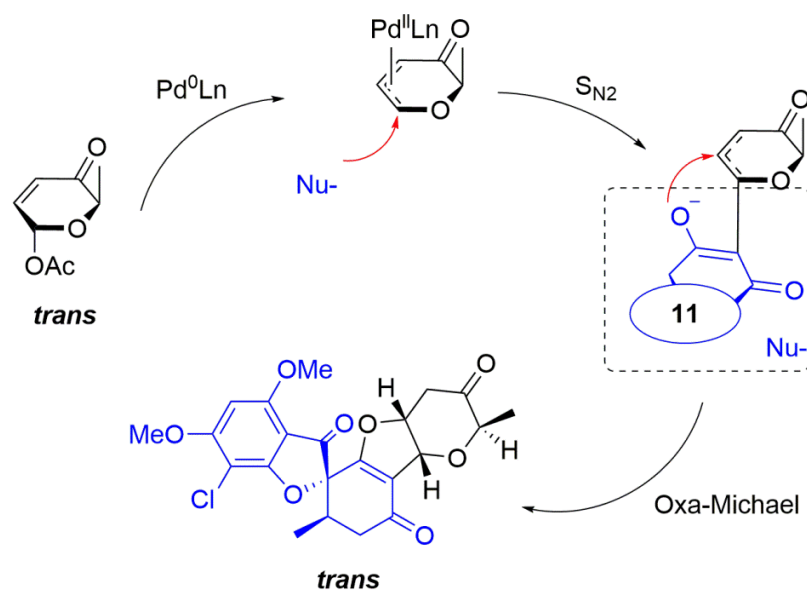



### General procedure for preparation of pyranones esters

Following our procedure reported<sup>2,3</sup> previously, acetoxy-2-pyranones were prepared successfully, **Scheme S3**.<sup>1-5</sup>

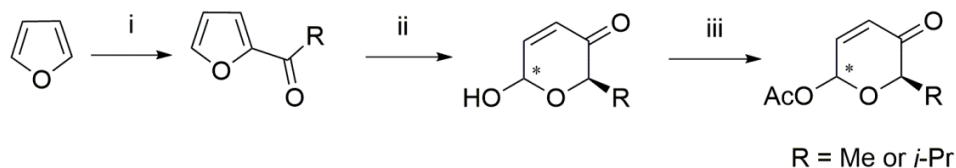

i: RCOOH, *n*-BuLi, THF. ii: a) [Cp\*RhCl<sub>2</sub>]<sub>2</sub> (0.05 mol%), (R,R)-Ts-DPEN (0.12 mol%), HCO<sub>2</sub>Na, 40°C; b) NBS, NaOAc, NaHCO<sub>3</sub>, THF/H<sub>2</sub>O, 40°C. iii: Ac<sub>2</sub>O, pyridine, DMAP, DCM. iv: cyclohexanone, *n*-BuLi, THF. v: NBS, NaOAc, NaHCO<sub>3</sub>, THF/H<sub>2</sub>O, 40°C. vi: Ac<sub>2</sub>O, pyridine, DMAP, DCM.

## Synthetic procedures and characterization data of all synthesized products

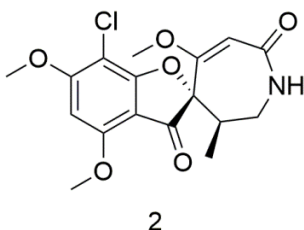

### (3R,4S)-7'-chloro-4',5,6'-trimethoxy-3-methyl-2,3-dihydro-3'H-spiro[azepine-4, 2'-benzofuran]-3',7(1H)-dione (2)

Griseofulvin **1** (176 mg, 0.5 mmol) was dissolved in trifluoroacetic acid (2 mL) in a 25 mL round-bottom flask. Subsequently, 10  $\mu$ l of water was added dropwise, then add 65 mg (1 mmol) of sodium azide several times. The resulting mixture was stirred at room temperature overnight. The reaction was monitored by TLC, the mixture was quenched with saturated sodium bicarbonate. The aqueous phase was extracted with ethyl acetate (10 ml x 3), the organic phases were combined, and then washed with water (20 ml x 2) and brine (10 ml x 1), dried with anhydrous sodium sulfate. The organic phase was directly employed to reduced pressure to remove the solvent, and the resulting residue was purified by flash column chromatography to give pure product **2** (88.0 mg, 48% yield) by using mixed ethyl acetate and petroleum ether (v:v = 1:1) as eluent.

White solid.  $R_f$  = 0.1 (EtOAc : petroleum ether = 1:1).  $^1\text{H}$  NMR (400 MHz,  $\text{CDCl}_3$ ):  $\delta$  6.12 (s, 1H, ArH), 5.44 (d,  $J$  = 1.2 Hz, 1H, C=CH), 4.02 (s, 3H,  $\text{OCH}_3$ ), 3.98 (s, 3H,  $\text{OCH}_3$ ), 3.96 – 3.91 (m, 1H,  $\text{CH}_2$ ), 3.54 (s, 3H,  $\text{OCH}_3$ ), 3.12 (dd,  $J$  = 15.0, 6.3 Hz, 1H,  $\text{CH}_2$ ), 2.55 – 2.44 (m, 1H, CH), 0.98 (d,  $J$  = 7.2 Hz, 3H,  $\text{CH}_3$ ).  $^{13}\text{C}$  NMR (100 MHz,  $\text{CDCl}_3$ ):  $\delta$  193.8 (C=O), 168.8 (C=ON), 168.1 (C=C), 164.3 (ArO), 161.1 (ArO), 157.6 (ArO), 105.8 (C=C), 102.0 (Ar), 97.2 (Ar), 92.9 (Ar), 89.3 (C), 57.0 ( $\text{OCH}_3$ ), 56.3 ( $\text{OCH}_3$ ), 55.9 ( $\text{OCH}_3$ ), 41.2 ( $\text{CH}_2$ ), 38.8 (CH), 13.0 ( $\text{CH}_3$ ). HRMS (ESI):  $m/z$  calcd for  $\text{C}_{17}\text{H}_{19}\text{NO}_6\text{Cl}$ : 368.0901; found: 368.0896  $[\text{M}+\text{H}]^+$ .

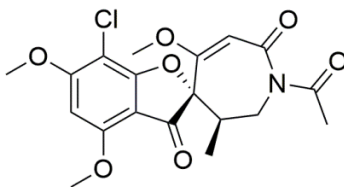

3a

**(3R,4S)-1-acetyl-7'-chloro-4',5,6'-trimethoxy-3-methyl-2,3-dihydro-3'H-spiro [azepine-4 ,2'-benzofuran] -3',7(1H)-dione (3a)**

Amide **2** (37 mg, 0.1 mmol) was dissolved in pyridine (0.5 mL) in a 5 mL round-bottom flask. Subsequently, add 0.5 ml of acetic anhydride and 2 mg (0.01 mmol) of DMAP. The resulting mixture was stirred at room temperature overnight. The reaction was monitored by TLC, adjust the mixture to pH=1 with 1M HCl. The aqueous phase was extracted with ethyl acetate (10 ml x 3), the organic phases were combined, and then washed with water (20 ml x 2) and brine (10 ml x 1), dried with anhydrous sodium sulfate. The organic phase was directly employed to reduced pressure to remove the solvent, and the resulting residue was purified by flash column chromatography to give pure product **3a** (37.0 mg, 91% yield) by using mixed ethyl acetate and petroleum ether (v:v = 1:2) as eluent.

White solid.  $R_f = 0.3$  (EtOAc : petroleum ether = 1:2).  $^1\text{H NMR}$  (400 MHz,  $\text{CDCl}_3$ ):  $\delta$  6.11 (s, 1H, ArH), 5.45 (s, 1H, C=CH), 4.13 (m, 2H,  $\text{CH}_2$ ), 4.01 (s, 3H,  $\text{OCH}_3$ ), 3.97 (s, 3H,  $\text{OCH}_3$ ), 3.63 (s, 3H,  $\text{OCH}_3$ ), 2.61 (s, 3H,  $\text{CH}_3$ ), 2.59 – 2.56 (m, 1H, CH), 1.01 (d,  $J = 7.2$  Hz, 3H,  $\text{CH}_3$ ).  $^{13}\text{C NMR}$  (100 MHz,  $\text{CDCl}_3$ ):  $\delta$  192.1 (C=O), 173.2 (C=O), 168.5 (C=ON), 168.2 (C=C), 164.5 (ArO), 162.4 (ArO), 157.9 (ArO), 104.8 (C=C), 101.4 (Ar), 97.2 (Ar), 92.7 (Ar), 89.5 (C), 57.0 ( $\text{OCH}_3$ ), 56.4 ( $\text{OCH}_3$ ), 56.4 ( $\text{OCH}_3$ ), 43.2 ( $\text{CH}_3$ ), 40.6 ( $\text{CH}_2$ ), 27.0 (CH), 13.5 ( $\text{CH}_3$ ). HRMS (ESI):  $m/z$  calcd for  $\text{C}_{19}\text{H}_{21}\text{NO}_7\text{Cl}$ : 410.1007; found: 410.1001  $[\text{M}+\text{H}]^+$ .

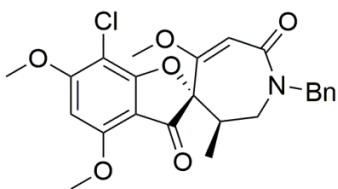

3b

**(3R,4S)-1-benzyl-7'-chloro-4',5,6'-trimethoxy-3-methyl-2,3-dihydro-3'H-spiro [azepine-4 ,2'-benzofuran] -3',7(1H)-dione (3b)**

Amide **2** (37 mg, 0.1 mmol) was dissolved in anhydrous tetrahydrofuran (1 mL) in a 5 mL round-bottom flask. Subsequently, cool to 0°C in an ice bath, add 5 mg (0.2 mmol) of NaH, then add 21 mg (0.12 mmol) of benzyl bromide after 30 min, and then return to room temperature. The resulting mixture was stirred at room temperature overnight. The reaction was monitored by TLC, the mixture was quenched with saturated ammonium chloride. The aqueous phase was extracted with ethyl acetate (10 ml x 3), the organic phases were combined, and then washed with water (20 ml x 2) and brine (10 ml x 1), dried with anhydrous sodium sulfate. The organic phase was directly employed to reduced pressure to remove the solvent, and the resulting residue was purified by flash column chromatography to give pure product **3b** (43.0 mg, 95% yield) by using mixed ethyl acetate and petroleum ether (v:v = 1:2) as eluent.

White solid.  $R_f = 0.3$  (EtOAc : petroleum ether = 1:2).  $^1\text{H NMR}$  (400 MHz,  $\text{CDCl}_3$ ):  $\delta$  7.38 – 7.28 (m, 5H, ArH), 6.08 (s, 1H, ArH), 5.59 (s, 1H, C=CH), 4.32 (d,  $J = 14.6$  Hz, 1H,  $\text{CH}_2$ ), 4.23 (dd,  $J = 15.4, 8.0$  Hz, 1H,  $\text{CH}_2$ ), 4.00 (s, 3H,  $\text{OCH}_3$ ), 3.96 (s, 3H,  $\text{OCH}_3$ ), 3.54 (s, 3H,  $\text{OCH}_3$ ), 2.96 (t,  $J = 7.7$  Hz, 2H,  $\text{CH}_2$ ), 2.31 (t,  $J = 7.4$  Hz, 1H, CH), 0.71 (d,  $J = 7.3$  Hz, 3H,  $\text{CH}_3$ ).  $^{13}\text{C NMR}$  (100 MHz,  $\text{CDCl}_3$ ):  $\delta$  194.2 (C=O), 168.9 (C=ON), 165.2 (C=C), 164.3 (ArO), 159.6 (ArO), 157.5 (ArO), 137.3 (Ar), 128.7 (Ar), 128.4 (Ar), 127.6 (Ar), 105.9 (C=C), 102.9 (Ar), 97.2 (Ar), 92.5 (Ar), 89.2 (C), 56.9 ( $\text{OCH}_3$ ), 56.3 ( $\text{OCH}_3$ ), 55.8, ( $\text{OCH}_3$ ) 51.9 ( $\text{CH}_2$ ), 47.1 ( $\text{CH}_2$ ), 39.1 (CH), 13.4 ( $\text{CH}_3$ ). HRMS (ESI):  $m/z$  calcd for  $\text{C}_{24}\text{H}_{25}\text{NO}_6\text{Cl}$ : 458.1370; found: 458.1374  $[\text{M}+\text{H}]^+$ .

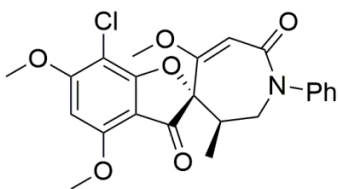

3c

**(3R,4S)-1-phenyl-7'-chloro-4',5,6'-trimethoxy-3-methyl-2,3-dihydro-3'H-spiro [azepine-4 ,2'-benzofuran] -3',7(1H)-dione (3c)**

Amide **2** (37 mg, 0.1 mmol) was dissolved in anhydrous DMSO (1 mL) in a 5 mL round-bottom flask. Subsequently, add 2 mg (0.01 mmol) of CuI, 15 mg (0.1 mmol) of CsF and 42 mg (0.2 mmol) of iodobenzene. The resulting mixture was stirred at 130 °C overnight. The reaction was monitored by TLC, the mixture was filtered, and the filtrate was diluted with ethyl acetate. Washed with water (20 ml x 2) and brine (10 ml x 1), dried with anhydrous sodium sulfate. The organic phase was directly employed to reduced pressure to remove the solvent, and the resulting residue was purified by flash column chromatography to give pure product **3c** (16.0 mg, 37% yield) by using mixed ethyl acetate and petroleum ether (v:v = 1:2) as eluent.

White oil.  $R_f$  = 0.3 (EtOAc : petroleum ether = 1:2).  $^1\text{H NMR}$  (400 MHz,  $\text{CDCl}_3$ ):  $\delta$  7.45 – 7.33 (m, 2H, ArH), 7.27 (s, 3H, ArH), 6.12 (s, 1H, ArH), 5.62 (s, 1H,  $\text{CH}_2$ ), 4.61 (dd,  $J$  = 15.3, 7.9 Hz, 1H,  $\text{C}=\text{CH}$ ), 4.02 (s, 3H,  $\text{OCH}_3$ ), 3.98 (s, 3H,  $\text{OCH}_3$ ), 3.58 (s, 3H,  $\text{OCH}_3$ ), 3.49 (d,  $J$  = 15.2 Hz, 1H,  $\text{CH}_2$ ), 2.75 (m, 1H, CH), 1.01 (d,  $J$  = 7.3 Hz, 3H,  $\text{CH}_3$ ).  $^{13}\text{C NMR}$  (100 MHz,  $\text{CDCl}_3$ ):  $\delta$  194.0 ( $\text{C}=\text{O}$ ), 169.0 ( $\text{C}=\text{ON}$ ), 164.9 ( $\text{C}=\text{C}$ ), 164.4 (ArO), 160.0 (ArO), 157.6 (ArO), 144.3 (Ar), 129.2 (Ar), 126.7 (Ar), 126.3 (Ar), 105.8 ( $\text{C}=\text{C}$ ), 103.2 (Ar), 97.3 (Ar), 92.6 (Ar), 89.3 (C), 57.0 ( $\text{OCH}_3$ ), 56.4 ( $\text{OCH}_3$ ), 56.0 ( $\text{OCH}_3$ ), 51.5 ( $\text{CH}_2$ ), 39.7 (CH), 13.6 ( $\text{CH}_3$ ). HRMS (ESI):  $m/z$  calcd for  $\text{C}_{23}\text{H}_{23}\text{NO}_6\text{Cl}$ : 444.1214; found: 444.1216  $[\text{M}+\text{H}]^+$ .

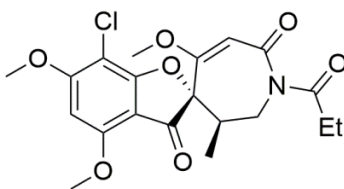

3d

**(3R,4S)-1-propionyl-7'-chloro-4',5,6'-trimethoxy-3-methyl-2,3-dihydro-3'H-spiro [azepine-4 ,2'-benzofuran] -3',7(1H)-dione (3d)**

Amide **2** (37 mg, 0.1 mmol) was dissolved in pyridine (0.5 mL) in a 5 mL round-bottom flask. Subsequently, add 0.5 ml of propionic anhydride and 2 mg (0.01 mmol) of DMAP. The resulting mixture was stirred at room temperature overnight. The reaction was monitored by TLC, adjust the mixture to pH=1 with 1M HCl. The aqueous phase was extracted with ethyl acetate (10 ml x 3), the organic phases were combined, and then washed with water (20 ml x 2) and brine (10 ml x 1), dried with anhydrous sodium sulfate. The organic phase was directly employed to reduced pressure to remove the solvent, and the resulting residue was purified by flash column chromatography to give pure product **3d** (40.0 mg, 92% yield) by using mixed ethyl acetate and petroleum ether (v:v = 1:2) as eluent.

White solid.  $R_f = 0.3$  (EtOAc : petroleum ether = 1:2).  $^1\text{H NMR}$  (400 MHz,  $\text{CDCl}_3$ ):  $\delta$  6.11 (s, 1H, ArH), 5.44 (s, 1H, C=CH), 4.14 (d,  $J = 4.9$  Hz, 2H,  $\text{CH}_2$ ), 4.01 (s, 3H,  $\text{OCH}_3$ ), 3.97 (s, 3H,  $\text{OCH}_3$ ), 3.62 (s, 3H,  $\text{OCH}_3$ ), 3.03 (q,  $J = 7.2$  Hz, 2H,  $\text{CH}_2$ ), 2.65 – 2.50 (m, 1H, CH), 1.18 (t,  $J = 7.3$  Hz, 3H,  $\text{CH}_3$ ), 1.01 (d,  $J = 7.2$  Hz, 3H,  $\text{CH}_3$ ).  $^{13}\text{C NMR}$  (100 MHz,  $\text{CDCl}_3$ ):  $\delta$  192.2 (C=O), 177.0 (C=O), 168.5 (C=ON), 168.0 (C=C), 164.4 (ArO), 162.2 (ArO), 157.8 (ArO), 104.9 (C=C), 101.8 (Ar), 97.1 (Ar), 92.7 (Ar), 89.4 (C), 57.0 ( $\text{OCH}_3$ ), 56.4 ( $\text{OCH}_3$ ), 56.4 ( $\text{OCH}_3$ ), 43.5 ( $\text{CH}_2$ ), 40.5 ( $\text{CH}_2$ ), 32.2 (CH), 13.4 ( $\text{CH}_3$ ), 9.3 ( $\text{CH}_3$ ). HRMS (ESI):  $m/z$  calcd for  $\text{C}_{20}\text{H}_{23}\text{NO}_7\text{Cl}$ : 424.1163; found: 424.1171  $[\text{M}+\text{H}]^+$ .

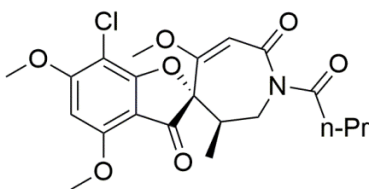

3e

**(3R,4S)-1-butryl-7'-chloro-4',5,6'-trimethoxy-3-methyl-2,3-dihydro-3'H-spiro [azepine-4 ,2'-benzofuran] -3',7(1H)-dione (3e)**

Amide **2** (37 mg, 0.1 mmol) was dissolved in pyridine (0.5 mL) in a 5 mL round-bottom flask. Subsequently, add 0.5 ml of butyric anhydride and 2 mg (0.01 mmol) of DMAP. The resulting mixture was stirred at room temperature overnight. The reaction was monitored by TLC, adjust the mixture to pH=1 with 1M HCl. The aqueous phase was extracted with ethyl acetate (10 ml x 3), the organic phases were combined, and then washed with water (20 ml x 2) and brine (10 ml x 1), dried with anhydrous sodium sulfate. The organic phase was directly employed to reduced pressure to remove the solvent, and the resulting residue was purified by flash column chromatography to give pure product **3e** (40.0 mg, 92% yield) by using mixed ethyl acetate and petroleum ether (v:v = 1:2) as eluent.

White solid.  $R_f = 0.3$  (EtOAc : petroleum ether = 1:2).  $^1\text{H NMR}$  (400 MHz,  $\text{CDCl}_3$ ):  $\delta$  6.11 (s, 1H, ArH), 5.46 (s, 1H, C=CH), 4.13 (d,  $J = 4.5$  Hz, 2H,  $\text{CH}_2$ ), 4.01 (s, 3H,  $\text{OCH}_3$ ), 3.97 (s, 3H,  $\text{OCH}_3$ ), 3.62 (s, 3H,  $\text{OCH}_3$ ), 3.04 – 2.94 (m, 2H,  $\text{CH}_2$ ), 2.56 (dd,  $J = 9.3, 7.2$  Hz, 1H,  $\text{CH}_2$ ), 2.32 (t,  $J = 7.4$  Hz, 1H,  $\text{CH}_2$ ), 1.78 – 1.61 (m, 3H, CH,  $\text{CH}_2$ ), 0.99 (dd,  $J = 11.2, 8.2$  Hz, 6H,  $\text{CH}_3$ ).  $^{13}\text{C NMR}$  (100 MHz,  $\text{CDCl}_3$ ):  $\delta$  192.3 (C=O), 176.2 (C=O), 168.5 (C=ON), 168.0 (C=C), 164.5 (ArO), 162.2 (ArO), 157.8 (ArO), 104.9 (C=C), 101.9 (Ar), 97.1 (Ar), 92.7 (Ar), 89.4 (C), 57.0 ( $\text{OCH}_3$ ), 56.4 ( $\text{OCH}_3$ ), 56.4 ( $\text{OCH}_3$ ), 43.3 ( $\text{CH}_2$ ), 40.6 ( $\text{CH}_2$ ), 40.4 (CH), 18.4 ( $\text{CH}_2$ ), 13.8 ( $\text{CH}_3$ ), 13.4 ( $\text{CH}_3$ ). HRMS (ESI):  $m/z$  calcd for  $\text{C}_{21}\text{H}_{25}\text{NO}_7\text{Cl}$ : 438.1320; found: 438.1325  $[\text{M}+\text{H}]^+$ .

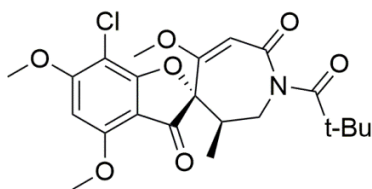

3f

**(3R,4S)-1-trimethylacetyl-7'-chloro-4',5,6'-trimethoxy-3-methyl-2,3-dihydro-3'H-spiro[azepine-4,2'-benzofuran] -3',7(1H)-dione (3f)**

Amide **2** (37 mg, 0.1 mmol) was dissolved in anhydrous DCM (0.5 mL) in a 5 mL round-bottom flask. Subsequently, add 50  $\mu$ l of pyridine, cool to 0 °C in an ice bath, add 200  $\mu$ l of trimethylacetyl chloride dropwise. The resulting mixture was stirred at room temperature for 2h. The reaction was monitored by TLC, adjust the mixture to pH=1 with 1M HCl. The aqueous phase was extracted with ethyl acetate (10 ml x 3), the organic phases were combined, and then washed with water (20 ml x 2) and brine (10 ml x 1), dried with anhydrous sodium sulfate. The organic phase was directly employed to reduced pressure to remove the solvent, and the resulting residue was purified by flash column chromatography to give pure product **3f** (28.0 mg, 63% yield) by using mixed ethyl acetate and petroleum ether (v:v = 1:2) as eluent.

White oil.  $R_f$  = 0.3 (EtOAc : petroleum ether = 1:2).  $^1\text{H}$  NMR (400 MHz,  $\text{CDCl}_3$ ):  $\delta$  6.11 (s, 1H, ArH), 5.44 (s, 1H, C=CH), 4.02 (s, 3H,  $\text{OCH}_3$ ), 4.00 (m, 1H,  $\text{CH}_2$ ), 3.98 (s, 3H,  $\text{OCH}_3$ ), 3.54 (s, 3H,  $\text{OCH}_3$ ), 3.12 (dd,  $J$  = 15.1, 6.3 Hz, 1H,  $\text{CH}_2$ ), 2.49 (m, 1H, CH), 1.23 (m, 9H,  $\text{CH}_3$ ), 0.98 (d,  $J$  = 7.2 Hz, 3H,  $\text{CH}_3$ ).  $^{13}\text{C}$  NMR (100 MHz,  $\text{CDCl}_3$ ):  $\delta$  193.8 (C=O), 189.3 (C=O), 168.8 (C=ON), 166.5 (C=C), 164.4 (ArO), 161.6 (ArO), 157.7 (ArO), 105.8 (C=C), 102.6 (Ar), 97.2 (Ar), 92.9 (Ar), 89.3 (C), 57.0 ( $\text{OCH}_3$ ), 56.4 ( $\text{OCH}_3$ ), 56.0 ( $\text{OCH}_3$ ), 51.8 (CH), 41.2 ( $\text{CH}_2$ ), 28.0 (CH), 27.2 ( $\text{CH}_3$ ), 13.0 ( $\text{CH}_3$ ). HRMS (ESI):  $m/z$  calcd for  $\text{C}_{22}\text{H}_{27}\text{NO}_7\text{Cl}$ : 452.1476; found: 452.1472  $[\text{M}+\text{H}]^+$ .



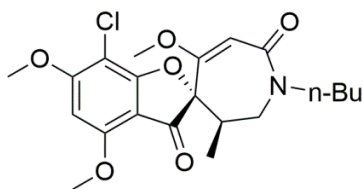

3g

**(3R,4S)-1-butyl-7'-chloro-4',5,6'-trimethoxy-3-methyl-2,3-dihydro-3'H-spiro [azepine-4 ,2'-benzofuran] -3',7(1H)-dione (3g)**

Amide **2** (37 mg, 0.1 mmol) was dissolved in anhydrous tetrahydrofuran (1 mL) in a 5 mL round-bottom flask. Subsequently, cool to 0°C in an ice bath, add 5 mg (0.2 mmol) of NaH, then add 16 mg (0.12 mmol) of N-butane bromide after 30 min, and then return to room temperature. The resulting mixture was stirred at room temperature overnight. The reaction was monitored by TLC, the mixture was quenched with saturated ammonium chloride. The aqueous phase was extracted with ethyl acetate (10 ml x 3), the organic phases were combined, and then washed with water (20 ml x 2) and brine (10 ml x 1), dried with anhydrous sodium sulfate. The organic phase was directly employed to reduced pressure to remove the solvent, and the resulting residue was purified by flash column chromatography to give pure product **3g** (35.0 mg, 83% yield) by using mixed ethyl acetate and petroleum ether (v:v = 1:2) as eluent.

White solid.  $R_f = 0.3$  (EtOAc : petroleum ether = 1:2).  $^1\text{H NMR}$  (400 MHz,  $\text{CDCl}_3$ ):  $\delta$  6.11 (s, 1H, ArH), 5.49 (s, 1H, C=CH), 4.27 (dd,  $J = 15.4, 8.1$  Hz, 1H,  $\text{CH}_2$ ), 4.02 (s, 3H,  $\text{OCH}_3$ ), 3.98 (s, 3H,  $\text{OCH}_3$ ), 3.75 – 3.62 (m, 1H,  $\text{CH}_2$ ), 3.51 (s, 3H,  $\text{OCH}_3$ ), 3.33 – 3.17 (m, 1H,  $\text{CH}_2$ ), 2.98 (d,  $J = 15.3$  Hz, 1H,  $\text{CH}_2$ ), 2.48 (m, 1H, CH), 1.53 (dddd,  $J = 13.2, 8.5, 5.3, 1.8$  Hz, 2H,  $\text{CH}_2$ ), 1.41 – 1.31 (m, 2H,  $\text{CH}_2$ ), 1.02 – 0.90 (m, 6H,  $\text{CH}_3$ ).  $^{13}\text{C NMR}$  (100 MHz,  $\text{CDCl}_3$ ):  $\delta$  194.3 (C=O), 169.0 (C=ON), 164.7 (C=C), 164.3 (ArO), 159.1 (ArO), 157.5 (ArO), 105.9 (C=C), 103.2 (Ar), 97.2 (Ar), 92.6 (Ar), 89.2 (C), 57.0 ( $\text{OCH}_3$ ), 56.3 ( $\text{OCH}_3$ ), 55.7 ( $\text{OCH}_3$ ), 49.1 ( $\text{CH}_2$ ), 48.2 ( $\text{CH}_2$ ), 39.3 (CH), 30.3 ( $\text{CH}_2$ ), 20.2 ( $\text{CH}_2$ ), 14.0 ( $\text{CH}_3$ ), 13.7 ( $\text{CH}_3$ ). HRMS (ESI):  $m/z$  calcd for  $\text{C}_{21}\text{H}_{27}\text{NO}_6\text{Cl}$ : 424.1527; found: 424.1531  $[\text{M}+\text{H}]^+$ .

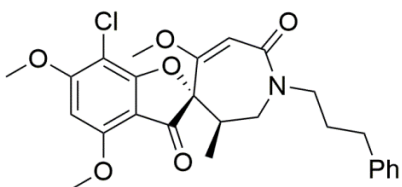

3h

**(3R,4S)-1-(3-phenylpropyl)-7'-chloro-4',5,6'-trimethoxy-3-methyl-2,3-dihydro-3'H-spiro[azepine-4,2'-benzofuran] -3',7(1H)-dione (3h)**

Amide **2** (37 mg, 0.1 mmol) was dissolved in anhydrous tetrahydrofuran (1 mL) in a 5 mL round-bottom flask. Subsequently, cool to 0°C in an ice bath, add 5 mg (0.2 mmol) of NaH, then add 24 mg (0.12 mmol) of 3-phenyl-1-bromopropane after 30 min, and then return to room temperature. The resulting mixture was stirred at room temperature overnight. The reaction was monitored by TLC, the mixture was quenched with saturated ammonium chloride. The aqueous phase was extracted with ethyl acetate (10 ml x 3), the organic phases were combined, and then washed with water (20 ml x 2) and brine (10 ml x 1), dried with anhydrous sodium sulfate. The organic phase was directly employed to reduced pressure to remove the solvent, and the resulting residue was purified by flash column chromatography to give pure product **3h** (42.0 mg, 86% yield) by using mixed ethyl acetate and petroleum ether (v:v = 1:2) as eluent.

White solid.  $R_f = 0.3$  (EtOAc : petroleum ether = 1:2).  $^1\text{H NMR}$  (400 MHz,  $\text{CDCl}_3$ ):  $\delta$ : 7.32 – 7.25 (m, 3H, ArH), 7.19 (s, 2H, ArH), 6.10 (s, 1H, ArH), 5.50 (s, 1H, C=CH), 4.24 (dd,  $J = 15.3, 8.0$  Hz, 1H,  $\text{CH}_2$ ), 4.00 (d,  $J = 1.5$  Hz, 3H,  $\text{OCH}_3$ ), 3.96 (d,  $J = 1.3$  Hz, 3H,  $\text{OCH}_3$ ), 3.72 (m, 1H,  $\text{CH}_2$ ), 3.51 (s, 3H,  $\text{OCH}_3$ ), 2.78 (t,  $J = 7.4$  Hz, 2H,  $\text{CH}_2$ ), 2.69 – 2.61 (m, 2H,  $\text{CH}_2$ ), 2.46 (q,  $J = 7.4$  Hz, 1H, CH), 2.17 (dq,  $J = 13.5, 6.6$  Hz, 2H,  $\text{CH}_2$ ), 0.94 (d,  $J = 7.2$  Hz, 3H,  $\text{CH}_3$ ).  $^{13}\text{C NMR}$  (100 MHz,  $\text{CDCl}_3$ ):  $\delta$  194.2 (C=O), 169.0 (C=ON), 164.9 (C=C), 164.3 (ArO), 159.3 (ArO), 157.6 (ArO), 141.6 (Ar), 128.6 (Ar), 128.5 (Ar), 128.4 (Ar), 128.3 (Ar), 126.0 (Ar), 105.9 (C=C), 103.2 (Ar), 97.2 (Ar), 92.5 (Ar), 89.2 (C), 57.0 ( $\text{OCH}_3$ ), 56.3 ( $\text{OCH}_3$ ), 55.7 ( $\text{OCH}_3$ ), 49.0 ( $\text{CH}_2$ ), 48.3 ( $\text{CH}_2$ ), 39.3

(CH), 34.0 (CH<sub>2</sub>), 33.3 (CH<sub>2</sub>), 13.7 (CH<sub>3</sub>). HRMS (ESI): *m/z* calcd for C<sub>26</sub>H<sub>29</sub>NO<sub>6</sub>Cl: 486.1683; found: 486.1687 [M+H]<sup>+</sup>.

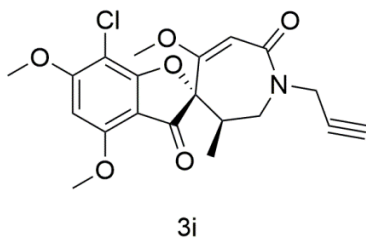

**(3R,4S)-1-allyl-7'-chloro-4',5,6'-trimethoxy-3-methyl-2,3-dihydro-3'H-Spiro [azepine-4 ,2'-benzofuran] -3',7(1H)-dione (3i)**

Amide **2** (37 mg, 0.1 mmol) was dissolved in anhydrous tetrahydrofuran (1 mL) in a 5 mL round-bottom flask. Subsequently, cool to 0°C in an ice bath, add 5 mg (0.2 mmol) of NaH, then add 13 mg (0.12 mmol) of 3-bromopropyne after 30 min, and then return to room temperature. The resulting mixture was stirred at room temperature overnight. The reaction was monitored by TLC, the mixture was quenched with saturated ammonium chloride. The aqueous phase was extracted with ethyl acetate (10 ml x 3), the organic phases were combined, and then washed with water (20 ml x 2) and brine (10 ml x 1), dried with anhydrous sodium sulfate. The organic phase was directly employed to reduced pressure to remove the solvent, and the resulting residue was purified by flash column chromatography to give pure product **3i** (32.0 mg, 79% yield) by using mixed ethyl acetate and petroleum ether (v:v = 1:2) as eluent.

White solid. *R<sub>f</sub>* = 0.3 (EtOAc : petroleum ether = 1:2). <sup>1</sup>H NMR (400 MHz, CDCl<sub>3</sub>): δ 6.12 (d, *J* = 1.4 Hz, 1H, ArH), 5.51 (s, 1H, C=CH), 4.71 (dt, *J* = 17.4, 2.0 Hz, 1H, CH<sub>2</sub>), 4.33 (ddd, *J* = 15.4, 8.0, 1.4 Hz, 1H, CH<sub>2</sub>), 4.02 (d, *J* = 1.4 Hz, 3H, OCH<sub>3</sub>), 3.98 (d, *J* = 1.4 Hz, 3H, OCH<sub>3</sub>), 3.53 (d, *J* = 1.3 Hz, 3H, OCH<sub>3</sub>), 3.24 (d, *J* = 15.4 Hz, 1H, CH), 2.61 (m, 1H, CH), 0.99 (dd, *J* = 7.3, 1.3 Hz, 3H, CH<sub>3</sub>). <sup>13</sup>C NMR (100 MHz, CDCl<sub>3</sub>): δ 194.2 (C=O), 169.0 (C=ON), 164.7 (C=C), 164.4 (ArO), 160.2 (ArO), 157.6 (ArO), 105.8 (C=C), 102.4 (Ar), 97.2 (Ar), 92.5 (Ar), 89.3 (C), 78.8 (CH), 72.1 (CH), 57.0 (OCH<sub>3</sub>),

56.4 (OCH<sub>3</sub>), 55.9 (OCH<sub>3</sub>), 46.9 (CH<sub>2</sub>), 39.0 (CH<sub>2</sub>), 37.1 (CH), 13.4 (CH<sub>3</sub>). HRMS (ESI): *m/z* calcd for C<sub>20</sub>H<sub>21</sub>NO<sub>6</sub>Cl: 406.1057; found: 406.1060 [M+H]<sup>+</sup>.

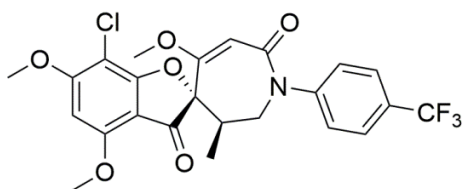

3j

**(3R,4S)-1-(4-Trifluoromethylphenyl)-7'-chloro-4',5,6'-trimethoxy-3-methyl-2,3-dihydro-3'H-spiro[azepine-4 ,2'-benzofuran] -3',7(1H)-dione (3j)**

Amide **2** (37 mg, 0.1 mmol) was dissolved in anhydrous DMSO (1 mL) in a 5 mL round-bottom flask. Subsequently, add 2 mg (0.01 mmol) of CuI, 15 mg (0.1 mmol) of CsF and 48 mg (0.2 mmol) of 4-trifluoromethyl iodobenzene. The resulting mixture was stirred at 130 °C overnight. The reaction was monitored by TLC, the mixture was filtered, and the filtrate was diluted with ethyl acetate. Washed with water (20 ml x 2) and brine (10 ml x 1), dried with anhydrous sodium sulfate. The organic phase was directly employed to reduced pressure to remove the solvent, and the resulting residue was purified by flash column chromatography to give pure product **3j** (16.0 mg, 31% yield) by using mixed ethyl acetate and petroleum ether (v:v = 1:2) as eluent.

White oil. *R<sub>f</sub>* = 0.3 (EtOAc : petroleum ether = 1:2). <sup>1</sup>H NMR (400 MHz, CDCl<sub>3</sub>): δ 7.36 – 7.28 (m, 2H, ArH), 7.24 (d, *J* = 8.6 Hz, 2H, ArH), 6.12 (s, 1H, ArH), 5.61 (s, 1H, C=CH), 4.59 (dd, *J* = 15.3, 7.8 Hz, 1H, CH<sub>2</sub>), 4.03 (s, 3H, OCH<sub>3</sub>), 3.99 (s, 3H, OCH<sub>3</sub>), 3.59 (s, 3H, OCH<sub>3</sub>), 3.49 (d, *J* = 15.2 Hz, 1H, CH<sub>2</sub>), 2.74 (m, 1H, CH), 1.02 (d, *J* = 7.3 Hz, 3H, CH<sub>3</sub>). <sup>13</sup>C NMR (100 MHz, CDCl<sub>3</sub>): δ 193.8 (C=O), 168.9 (C=ON), 165.1 (C=C), 164.5 (ArO), 160.4 (ArO), 157.7 (ArO), 147.2 (Ar), 142.7 (Ar), 129.9 (Ar), 127.7 (Ar), 121.8 (CF<sub>3</sub>), 105.7 (C=C), 102.8 (Ar), 97.3 (Ar), 92.4 (Ar), 89.3 (C), 57.0 (OCH<sub>3</sub>), 56.4 (OCH<sub>3</sub>), 56.0 (OCH<sub>3</sub>), 51.5 (CH<sub>2</sub>), 39.7 (CH), 13.6 (CH<sub>3</sub>). HRMS (ESI): *m/z* calcd for C<sub>24</sub>H<sub>22</sub>NO<sub>6</sub>F<sub>3</sub>Cl: 512.1088; found: 512.1090 [M+H]<sup>+</sup>.

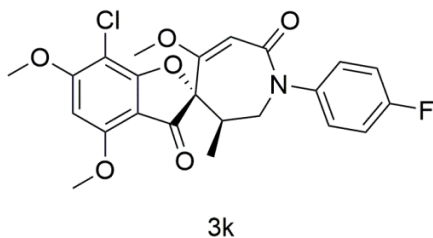

**(3R,4S)-1-(4-fluorophenyl)-7'-chloro-4',5,6'-trimethoxy-3-methyl-2,3-dihydro-3'H-spiro[azepine-4,2'-benzofuran] -3',7(1H)-dione (3k)**

Amide **2** (37 mg, 0.1 mmol) was dissolved in anhydrous DMSO (1 mL) in a 5 mL round-bottom flask. Subsequently, add 2 mg (0.01 mmol) of CuI, 15 mg (0.1 mmol) of CsF and 43 mg (0.2 mmol) of 4-fluoroiodobenzene. The resulting mixture was stirred at 130 °C overnight. The reaction was monitored by TLC, the mixture was filtered, and the filtrate was diluted with ethyl acetate. Washed with water (20 ml x 2) and brine (10 ml x 1), dried with anhydrous sodium sulfate. The organic phase was directly employed to reduced pressure to remove the solvent, and the resulting residue was purified by flash column chromatography to give pure product **3k** (19.0 mg, 42% yield) by using mixed ethyl acetate and petroleum ether (v:v = 1:2) as eluent.

White oil.  $R_f$  = 0.3 (EtOAc : petroleum ether = 1:2).  $^1\text{H}$  NMR (400 MHz,  $\text{CDCl}_3$ ):  $\delta$  7.40 – 7.32 (m, 2H, ArH), 7.26 – 7.13 (m, 2H, ArH), 6.12 (s, 1H, ArH), 5.60 (s, 1H, C=CH), 4.57 (dd,  $J$  = 15.3, 7.8 Hz, 1H,  $\text{CH}_2$ ), 4.02 (s, 3H,  $\text{OCH}_3$ ), 3.99 (s, 3H,  $\text{OCH}_3$ ), 3.58 (s, 3H,  $\text{OCH}_3$ ), 3.47 (d,  $J$  = 15.2 Hz, 1H,  $\text{CH}_2$ ), 2.73 (m, 1H, CH), 1.01 (d,  $J$  = 7.3 Hz, 3H,  $\text{CH}_3$ ).  $^{13}\text{C}$  NMR (100 MHz,  $\text{CDCl}_3$ ):  $\delta$  193.8 (C=O), 168.9 (C=ON), 165.0 (C=C), 164.4 (ArO), 160.3 (ArO), 157.7 (ArO), 142.7 (Ar), 132.2 (Ar), 129.4 (Ar), 127.6 (Ar), 105.7 (C=C), 102.9 (Ar), 97.3 (Ar), 92.5 (Ar), 89.3 (C), 57.0 ( $\text{OCH}_3$ ), 56.4 ( $\text{OCH}_3$ ), 56.0 ( $\text{OCH}_3$ ), 51.5 ( $\text{CH}_2$ ), 39.7 (CH), 13.6 ( $\text{CH}_3$ ). HRMS (ESI):  $m/z$  calcd for  $\text{C}_{23}\text{H}_{21}\text{NO}_6\text{FNaCl}$ : 484.0939; found: 484.0939  $[\text{M}+\text{Na}]^+$ .

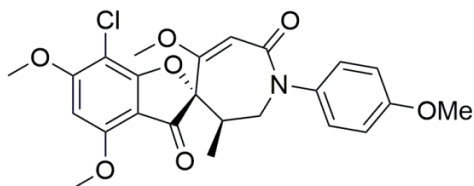

3I

**(3R,4S)-1-(4-methoxyphenyl)-7'-chloro-4',5,6'-trimethoxy-3-methyl-2,3-dihydro-3'H-spiro[azepine-4 ,2'-benzofuran] -3',7(1H)-dione (3I)**

Amide **2** (37 mg, 0.1 mmol) was dissolved in anhydrous DMSO (1 mL) in a 5 mL round-bottom flask. Subsequently, add 2 mg (0.01 mmol) of CuI, 15 mg (0.1 mmol) of CsF and 45 mg (0.2 mmol) of 4-methoxy iodobenzene. The resulting mixture was stirred at 130 °C overnight. The reaction was monitored by TLC, the mixture was filtered, and the filtrate was diluted with ethyl acetate. Washed with water (20 ml x 2) and brine (10 ml x 1), dried with anhydrous sodium sulfate. The organic phase was directly employed to reduced pressure to remove the solvent, and the resulting residue was purified by flash column chromatography to give pure product **3I** (17.0 mg, 37% yield) by using mixed ethyl acetate and petroleum ether (v:v = 1:2) as eluent.

White solid.  $R_f = 0.3$  (EtOAc : petroleum ether = 1:2).  $^1\text{H NMR}$  (400 MHz,  $\text{CDCl}_3$ ):  $\delta$  7.26 – 7.08 (m, 2H, ArH), 6.99 – 6.84 (m, 2H, ArH), 6.11 (s, 1H, ArH), 5.62 (s, 1H, C=CH), 4.57 (dd,  $J = 15.3, 7.9$  Hz, 1H,  $\text{CH}_2$ ), 4.02 (s, 3H,  $\text{OCH}_3$ ), 3.98 (s, 3H,  $\text{OCH}_3$ ), 3.81 (s, 3H,  $\text{OCH}_3$ ), 3.57 (s, 3H,  $\text{OCH}_3$ ), 3.46 – 3.40 (m, 1H,  $\text{CH}_2$ ), 2.74 (m, 1H, CH), 1.00 (d,  $J = 7.3$  Hz, 3H,  $\text{CH}_3$ ).  $^{13}\text{C NMR}$  (100 MHz,  $\text{CDCl}_3$ ):  $\delta$  194.1 (C=O), 169.0 (C=ON), 165.1 (C=C), 164.4 (ArO), 159.9 (ArO), 158.1 (ArO), 157.6 (Ar), 137.3 (Ar), 127.4 (Ar), 114.5 (Ar), 105.8, 103.3 (Ar), 97.3 (Ar), 92.6 (Ar), 89.3 (C), 57.0 ( $\text{OCH}_3$ ), 56.4 ( $\text{OCH}_3$ ), 56.0 ( $\text{OCH}_3$ ), 55.5 ( $\text{OCH}_3$ ), 51.8 ( $\text{CH}_2$ ), 39.7 (CH), 13.6 ( $\text{CH}_3$ ). HRMS (ESI):  $m/z$  calcd for  $\text{C}_{24}\text{H}_{25}\text{NO}_7\text{Cl}$ : 474.1320; found: 474.1324  $[\text{M}+\text{H}]^+$ .

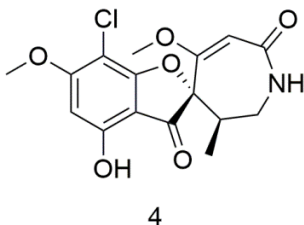

**(3R,4S)-7'-chloro-4'-hydroxy-5,6'-dimethoxy-3-methyl-2,3-dihydro-3'H-spiro [azepine-4 ,2'-benzofuran] -3',7(1H)-dione (4)**

Amide **2** (73 mg, 0.2 mmol) was dissolved in anhydrous DCM (10 mL) in a 25 mL round-bottom flask under nitrogen atmosphere. Subsequently, cool to 0°C in an ice bath, Then add 2 ml of BBr<sub>3</sub> in dichloromethane solution (1M), and return to room temperature after half an hour. The resulting mixture was stirred at room temperature overnight. The reaction was monitored by TLC, the mixture was quenched with saturated sodium bicarbonate. The aqueous phase was extracted with DCM (10 ml x 3), the organic phases were combined, and then washed with water (20 ml x 2) and brine (10 ml x 1), dried with anhydrous sodium sulfate. The organic phase was directly employed to reduced pressure to remove the solvent, and the resulting residue was purified by flash column chromatography to give pure product **4** (65.0 mg, 91% yield) by using mixed methanol and dichloromethane (v:v = 1:10) as eluent.

White solid.  $R_f = 0.2$  (MeOH : DCM = 1:10). <sup>1</sup>H NMR (400 MHz, DMSO-*d*<sub>6</sub>):  $\delta$  8.16 – 8.07 (m, 1H, OH), 7.94 – 7.86 (m, 1H, NH), 6.24 (s, 2H, ArH), 5.33 (d,  $J = 1.6$  Hz, 1H, C=CH), 4.83 (d,  $J = 11.5$  Hz, 1H, CH<sub>2</sub>), 3.90 (s, 4H, OCH<sub>3</sub>), 3.49 (s, 3H, OCH<sub>3</sub>), 2.45 (ddd,  $J = 10.6, 6.8, 2.4$  Hz, 1H, CH<sub>2</sub>), 2.28 (m, 1H, CH), 0.83 (d,  $J = 7.2$  Hz, 3H, CH<sub>3</sub>). <sup>13</sup>C NMR (100 MHz, DMSO-*d*<sub>6</sub>):  $\delta$  193.0 (C=O), 167.8 (C=ON), 166.3 (C=C), 163.8 (ArO), 160.0 (ArO), 157.2 (ArO), 105.0 (C=C), 103.2 (Ar), 99.6 (Ar), 94.4 (Ar), 92.8 (C), 57.5 (OCH<sub>3</sub>), 56.2 (OCH<sub>3</sub>), 44.9(CH<sub>2</sub>), 39.0 (CH), 12.9 (CH<sub>3</sub>). HRMS (ESI):  $m/z$  calcd for C<sub>16</sub>H<sub>17</sub>NO<sub>6</sub>Cl: 354.0744; found: 354.0734 [M+H]<sup>+</sup>.

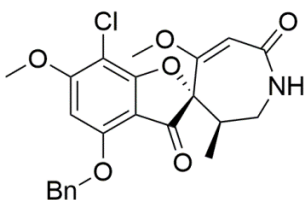

5a

**(3R,4S)-7'-chloro-4'-benzyloxy-5,6'-dimethoxy-3-methyl-2,3-dihydro-3'H-spiro [azepine-4 ,2'-benzofuran] -3',7(1H)-dione (5a)**

Compound **4** (35 mg, 0.1 mmol) was dissolved in anhydrous DMF (1 mL) in a 5 mL round-bottom flask. Subsequently, add 21 mg (0.12 mmol) of benzyl bromide and 28 mg (0.2 mmol) of anhydrous potassium carbonate. The resulting mixture was stirred at room temperature overnight. The reaction was monitored by TLC, the mixture was diluted with ethyl acetate (20 ml). Washed with water (20 ml x 2) and brine (10 ml x 1), dried with anhydrous sodium sulfate. The organic phase was directly employed to reduced pressure to remove the solvent, and the resulting residue was purified by flash column chromatography to give pure product **5a** (40.0 mg, 87% yield) by using mixed ethyl acetate and petroleum ether (v:v = 1:1) as eluent.

White solid.  $R_f = 0.2$  (EtOAc : petroleum ether = 1:1).  $^1\text{H NMR}$  (400 MHz,  $\text{CDCl}_3$ ):  $\delta$  7.51 – 7.44 (m, 2H, ArH), 7.40 (t,  $J = 7.4$  Hz, 2H, ArH), 7.34 (dd,  $J = 8.3, 6.1$  Hz, 1H, ArH), 6.40 (t,  $J = 5.6$  Hz, 1H, NH), 6.15 (s, 1H, ArH), 5.45 (d,  $J = 1.7$  Hz, 1H, C=CH), 5.27 (s, 2H,  $\text{CH}_2$ ), 3.98 (ddd,  $J = 15.0, 8.3, 4.7$  Hz, 1H,  $\text{CH}_2$ ), 3.92 (s, 3H,  $\text{OCH}_3$ ), 3.55 (s, 3H,  $\text{OCH}_3$ ), 3.11 (dd,  $J = 15.1, 6.3$  Hz, 1H,  $\text{CH}_2$ ), 2.50 (t,  $J = 7.5$  Hz, 1H, CH), 1.00 (d,  $J = 7.2$  Hz, 3H,  $\text{CH}_3$ ).  $^{13}\text{C NMR}$  (100 MHz,  $\text{CDCl}_3$ ):  $\delta$  193.5 (C=O), 168.8 (C=ON), 167.8 (C=C), 164.0 (ArO), 161.1 (ArO), 156.6 (ArO), 135.6 (Ar), 128.8 (Ar), 128.3 (Ar), 126.9 (Ar), 106.3 (C=C), 102.0 (Ar), 97.4 (Ar), 92.9 (Ar), 91.5 (C), 71.1 ( $\text{CH}_2$ ), 56.9 ( $\text{OCH}_3$ ), 56.0 ( $\text{OCH}_3$ ), 41.2 ( $\text{CH}_2$ ), 39.0 (CH), 13.1 ( $\text{CH}_3$ ). HRMS (ESI): m/z calcd for  $\text{C}_{23}\text{H}_{23}\text{NO}_6\text{Cl}$ : 444.1214; found: 444.1212  $[\text{M}+\text{H}]^+$ .



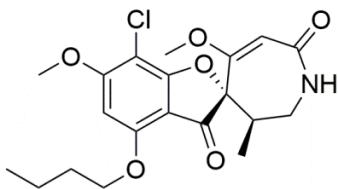

5b

**(3R,4S)-7'-chloro-4'-butoxy-5,6'-dimethoxy-3-methyl-2,3-dihydro-3'H-spiro [azepine-4 ,2'-benzofuran] -3',7(1H)-dione (5b)**

Compound **4** (35 mg, 0.1 mmol) was dissolved in anhydrous DMF (1 mL) in a 5 mL round-bottom flask. Subsequently, add 16 mg (0.12 mmol) of N-butane bromide and 28 mg (0.2 mmol) of anhydrous potassium carbonate. The resulting mixture was stirred at room temperature overnight. The reaction was monitored by TLC, the mixture was diluted with ethyl acetate (20 ml). Washed with water (20 ml x 2) and brine (10 ml x 1), dried with anhydrous sodium sulfate. The organic phase was directly employed to reduced pressure to remove the solvent, and the resulting residue was purified by flash column chromatography to give pure product **5b** (35.0 mg, 86% yield) by using mixed ethyl acetate and petroleum ether (v:v = 1:1) as eluent.

White solid.  $R_f = 0.3$  (EtOAc : petroleum ether = 1:1).  $^1\text{H NMR}$  (400 MHz,  $\text{CDCl}_3$ ):  $\delta$  6.11 (s, 1H, ArH), 5.42 (d,  $J = 2.0$  Hz, 1H, C=CH), 4.20 – 4.09 (m, 3H,  $\text{CH}_2$ ), 4.00 (d,  $J = 2.1$  Hz, 3H,  $\text{OCH}_3$ ), 3.53 (d,  $J = 2.3$  Hz, 3H,  $\text{OCH}_3$ ), 3.09 (dd,  $J = 15.1, 6.3$  Hz, 1H,  $\text{CH}_2$ ), 2.49 (m, 1H, CH), 1.94 – 1.82 (m, 2H,  $\text{CH}_2$ ), 1.53 (m, 2H,  $\text{CH}_2$ ), 0.98 (m, 6H,  $\text{CH}_3$ ).  $^{13}\text{C NMR}$  (100 MHz,  $\text{CDCl}_3$ ):  $\delta$  193.4 (C=O), 168.7 (C=ON), 168.1 (C=C), 164.1 (ArO), 161.2 (ArO), 157.3 (ArO), 105.9 (C=C), 101.9 (Ar), 96.8 (Ar), 92.7 (Ar), 90.2 (C), 69.2 ( $\text{CH}_2$ ), 56.9 ( $\text{OCH}_3$ ), 55.9 ( $\text{OCH}_3$ ), 41.1 ( $\text{CH}_2$ ), 39.0 (CH), 30.8 ( $\text{CH}_2$ ), 19.1 ( $\text{CH}_2$ ), 13.8 ( $\text{CH}_3$ ), 13.1 ( $\text{CH}_3$ ). HRMS (ESI):  $m/z$  calcd for  $\text{C}_{20}\text{H}_{25}\text{NO}_6\text{Cl}$ : 410.1370; found: 410.1371  $[\text{M}+\text{H}]^+$ .

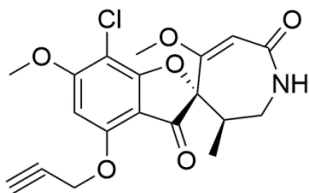

5c

**(3R,4S)-7'-chloro-4'-propargyloxy-5,6'-dimethoxy-3-methyl-2,3-dihydro-3'H-spiro [azepine-4 ,2'-benzofuran] -3',7(1H)-dione (5c)**

Compound **4** (35 mg, 0.1 mmol) was dissolved in anhydrous DMF (1 mL) in a 5 mL round-bottom flask. Subsequently, add 13 mg (0.12 mmol) of 3-bromopropyne and 28 mg (0.2 mmol) of anhydrous potassium carbonate. The resulting mixture was stirred at room temperature overnight. The reaction was monitored by TLC, the mixture was diluted with ethyl acetate (20 ml). Washed with water (20 ml x 2) and brine (10 ml x 1), dried with anhydrous sodium sulfate. The organic phase was directly employed to reduced pressure to remove the solvent, and the resulting residue was purified by flash column chromatography to give pure product **5c** (28.0 mg, 72% yield) by using mixed ethyl acetate and petroleum ether (v:v = 1:1) as eluent.

White solid.  $R_f = 0.2$  (EtOAc : petroleum ether = 1:1).  $^1\text{H NMR}$  (400 MHz,  $\text{CDCl}_3$ ):  $\delta$  6.36 (s, 1H, ArH), 5.43 (d,  $J = 1.7$  Hz, 1H, C=CH), 4.91 (dd,  $J = 3.9, 2.5$  Hz, 2H,  $\text{CH}_2$ ), 4.02 (s, 3H,  $\text{OCH}_3$ ), 3.97 – 3.88 (m, 2H,  $\text{CH}_2$ ), 3.54 (s, 3H,  $\text{OCH}_3$ ), 3.13 (dd,  $J = 15.1, 6.2$  Hz, 1H, CH), 2.55 – 2.38 (m, 1H, CH), 0.98 (d,  $J = 7.2$  Hz, 3H,  $\text{CH}_3$ ).  $^{13}\text{C NMR}$  (100 MHz,  $\text{CDCl}_3$ ):  $\delta$  193.6 (C=O), 168.7 (C=ON), 167.9 (C=C), 164.0 (ArO), 160.9 (ArO), 155.2 (ArO), 106.2 (C=C), 102.2 (Ar), 98.1 (Ar), 93.0 (Ar), 91.7 (CHC), 77.5 (CHC), 57.1 ( $\text{CH}_2$ ), 57.0 ( $\text{OCH}_3$ ), 55.9 ( $\text{OCH}_3$ ), 41.1 ( $\text{CH}_2$ ), 38.9 (CH), 12.9 ( $\text{CH}_3$ ). HRMS (ESI): m/z calcd for  $\text{C}_{19}\text{H}_{19}\text{NO}_6\text{Cl}$ : 392.0901; found: 392.0899  $[\text{M}+\text{H}]^+$ .

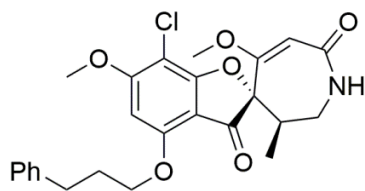

5d

**(3R,4S)-7'-chloro-4'-(3-phenylpropoxy)-5,6'-dimethoxy-3-methyl-2,3-dihydro-3'H-spiro[azepine-4,2'-benzofuran] -3',7(1H)-dione (5d)**

Compound **4** (35 mg, 0.1 mmol) was dissolved in anhydrous DMF (1 mL) in a 5 mL round-bottom flask. Subsequently, add 24 mg (0.12 mmol) of 3-phenyl-1-bromopropane and 28 mg (0.2 mmol) of anhydrous potassium carbonate. The resulting mixture was stirred at room temperature overnight. The reaction was monitored by TLC, the mixture was diluted with ethyl acetate (20 ml). Washed with water (20 ml x 2) and brine (10 ml x 1), dried with anhydrous sodium sulfate. The organic phase was directly employed to reduced pressure to remove the solvent, and the resulting residue was purified by flash column chromatography to give pure product **5d** (38.0 mg, 83% yield) by using mixed ethyl acetate and petroleum ether (v:v = 1:1) as eluent.

White solid.  $R_f = 0.3$  (EtOAc : petroleum ether = 1:1).  $^1\text{H NMR}$  (400 MHz,  $\text{CDCl}_3$ ):  $\delta$  7.31 – 7.24 (m, 3H, ArH), 7.19 (s, 2H, ArH), 6.01 (s, 1H, ArH), 5.43 (d,  $J = 1.4$  Hz, 1H, C=CH,  $\text{CH}_2$ ), 4.09 (t,  $J = 6.4$  Hz, 2H,  $\text{CH}_2$ ), 3.92 (s, 3H,  $\text{OCH}_3$ ), 3.54 (s, 3H,  $\text{OCH}_3$ ), 3.10 (dd,  $J = 15.0, 6.3$  Hz, 1H,  $\text{CH}_2$ ), 2.58 – 2.41 (m, 1H, CH), 2.20 (q,  $J = 6.9$  Hz, 2H,  $\text{CH}_2$ ), 0.99 (d,  $J = 7.2$  Hz, 3H,  $\text{CH}_3$ ).  $^{13}\text{C NMR}$  (100 MHz,  $\text{CDCl}_3$ ):  $\delta$  193.5 (C=O), 168.7 (C=ON), 167.9 (C=C), 164.1 (ArO), 162.6 (ArO), 161.2 (Ar), 157.1 (ArO), 140.9 (Ar), 128.6 (Ar), 128.5 (Ar), 126.1 (Ar), 106.0 (Ar), 102.0 (Ar), 97.0 (Ar), 92.8 (Ar), 90.3 (C), 68.1, 56.9 ( $\text{OCH}_3$ ), 55.9 ( $\text{OCH}_3$ ), 41.1 ( $\text{CH}_2$ ), 39.0 (CH), 31.6 ( $\text{CH}_2$ ), 30.1 ( $\text{CH}_2$ ), 13.1 ( $\text{CH}_3$ ). HRMS (ESI):  $m/z$  calcd for  $\text{C}_{25}\text{H}_{27}\text{NO}_6\text{Cl}$ : 472.1527; found: 472.1534  $[\text{M}+\text{H}]^+$ .

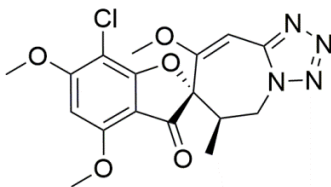

6

**(2*S*,6'*R*)-7-chloro-4,6,8'-trimethoxy-6'-methyl-5',6'-dihydro-3*H*-spiro[benzofuran-2,7'-tetrazole [1,5-*a*] azepine]-3-one (6)**

Griseofulvin **1** (176 mg, 0.5 mmol) was dissolved in trifluoroacetic acid (2 mL) in a 25 mL round-bottom flask. Subsequently, add 163 mg (2.5 mmol) of sodium azide several times. The resulting mixture was stirred at room temperature overnight. The reaction was monitored by TLC, the mixture was quenched with saturated sodium bicarbonate. The aqueous phase was extracted with ethyl acetate (10 ml x 3), the organic phases were combined, and then washed with water (20 ml x 2) and brine (10 ml x 1), dried with anhydrous sodium sulfate. The organic phase was directly employed to reduced pressure to remove the solvent, and the resulting residue was purified by flash column chromatography to give pure product **6** (82.0 mg, 42% yield) by using mixed ethyl acetate and petroleum ether (v:v = 1:2) as eluent.

White solid.  $R_f = 0.3$  (EtOAc : petroleum ether = 1:1).  $^1\text{H NMR}$  (400 MHz,  $\text{CDCl}_3$ ):  $\delta$  6.30 (s, 1H, ArH), 6.16 (s, 1H, C=CH), 4.92 (dd,  $J = 14.7, 7.3$  Hz, 1H,  $\text{CH}_2$ ), 4.69 (dd,  $J = 14.7, 1.3$  Hz, 1H,  $\text{CH}_2$ ), 4.04 (s, 3H,  $\text{OCH}_3$ ), 4.01 (s, 3H,  $\text{OCH}_3$ ), 3.69 (s, 3H,  $\text{OCH}_3$ ), 2.64 – 2.48 (m, 1H, CH), 1.07 (d,  $J = 7.2$  Hz, 3H,  $\text{CH}_3$ ).  $^{13}\text{C NMR}$  (100 MHz,  $\text{CDCl}_3$ ):  $\delta$  192.6 (C=O), 168.1 (C=C), 164.7 (ArO), 159.8 (ArO), 158.0 (ArO), 149.7 (C=N), 105.0 (C=C), 97.5 (Ar), 90.9 (Ar), 90.3 (C), 89.7 (Ar), 57.1 ( $\text{OCH}_3$ ), 56.6 ( $\text{OCH}_3$ ), 56.5 ( $\text{OCH}_3$ ), 47.6 ( $\text{CH}_2$ ), 34.8 (CH), 11.3 ( $\text{CH}_3$ ). HRMS (ESI):  $m/z$  calcd for  $\text{C}_{17}\text{H}_{18}\text{N}_4\text{O}_5\text{Cl}$ : 393.0966; found: 393.0973  $[\text{M}+\text{H}]^+$ .

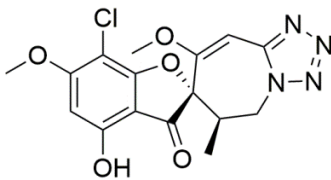

7

**(2*S*,6'*R*)-7-chloro-4-hydroxy-6,8'-dimethoxy-6'-methyl-5',6'-dihydro-3*H*-spiro[benzofuran-2,7'-tetrazole [1,5-*a*] azepine]-3-one (7)**

Compound **6** (78 mg, 0.2 mmol) was dissolved in anhydrous DCM (10 mL) in a 25 mL round-bottom flask under nitrogen atmosphere. Subsequently, cool to 0°C in an ice bath, Then add 2 ml of BBr<sub>3</sub> in dichloromethane solution (1M), and return to room temperature after half an hour. The resulting mixture was stirred at room temperature overnight. The reaction was monitored by TLC, the mixture was quenched with saturated sodium bicarbonate. The aqueous phase was extracted with DCM (10 ml x 3), the organic phases were combined, and then washed with water (20 ml x 2) and brine (10 ml x 1), dried with anhydrous sodium sulfate. The organic phase was directly employed to reduced pressure to remove the solvent, and the resulting residue was purified by flash column chromatography to give pure product **7** (70.0 mg, 93% yield) by using mixed ethyl acetate and petroleum ether (v:v = 1:1) as eluent.

White solid.  $R_f = 0.2$  (EtOAc : petroleum ether = 1:1). <sup>1</sup>H NMR (400 MHz, CDCl<sub>3</sub>): δ 6.35 (s, 1H, ArH), 6.26 (s, 1H, C=CH), 4.89 (dd,  $J = 14.8, 6.6$  Hz, 1H, CH<sub>2</sub>), 4.75 (dd,  $J = 14.7, 1.5$  Hz, 1H, CH<sub>2</sub>), 3.99 (s, 3H, OCH<sub>3</sub>), 3.73 (s, 3H, OCH<sub>3</sub>), 2.58 (m, 1H, CH), 1.08 (d,  $J = 7.2$  Hz, 3H, CH<sub>3</sub>). <sup>13</sup>C NMR (100 MHz, CDCl<sub>3</sub>): δ 195.6 (C=O), 165.8 (C=C), 165.5 (ArO), 159.2 (ArO), 156.4 (ArO), 149.6 (C=N), 103.7 (C=C), 96.8 (Ar), 94.1 (Ar), 91.5 (C), 90.6 (Ar), 57.3 (OCH<sub>3</sub>), 56.8 (OCH<sub>3</sub>), 48.1 (CH<sub>2</sub>), 34.5 (CH), 10.9 (CH<sub>3</sub>). HRMS (ESI):  $m/z$  calcd for C<sub>16</sub>H<sub>16</sub>N<sub>4</sub>O<sub>5</sub>Cl: 379.0809; found: 379.0812 [M+H]<sup>+</sup>.

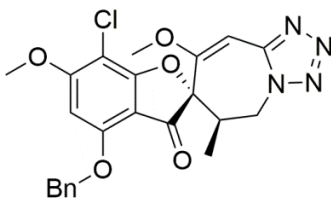

8a

**(2S,6'R)-7-chloro-4-benzyloxy-6,8'-dimethoxy-6'-methyl-5',6'-dihydro-3H-spiro[benzofuran-2,7'-tetrazole [1,5-a] azepine]-3-one (8a)**

Compound **7** (47 mg, 0.1 mmol) was dissolved in anhydrous DMF (1 mL) in a 5 mL round-bottom flask. Subsequently, add 21 mg (0.12 mmol) of benzyl bromide and 28 mg (0.2 mmol) of anhydrous potassium carbonate. The resulting mixture was stirred at room temperature overnight. The reaction was monitored by TLC, the mixture was diluted with ethyl acetate (20 ml). Washed with water (20 ml x 2) and brine (10 ml x 1), dried with anhydrous sodium sulfate. The organic phase was directly employed to reduced pressure to remove the solvent, and the resulting residue was purified by flash column chromatography to give pure product **8a** (40.0 mg, 68% yield) by using mixed ethyl acetate and petroleum ether (v:v = 1:3) as eluent.

White solid.  $R_f = 0.2$  (EtOAc : petroleum ether = 1:3).  $^1\text{H NMR}$  (400 MHz,  $\text{CDCl}_3$ ):  $\delta$  7.49 (d,  $J = 7.3$  Hz, 2H, ArH), 7.41 (t,  $J = 7.4$  Hz, 2H, ArH), 7.35 (d,  $J = 7.2$  Hz, 1H, ArH), 6.31 (s, 1H, ArH), 6.19 (s, 1H, C=CH), 5.30 (d,  $J = 2.2$  Hz, 2H,  $\text{OCH}_2$ ), 4.94 (dd,  $J = 14.7, 7.4$  Hz, 1H,  $\text{CH}_2$ ), 4.69 (dd,  $J = 14.7, 1.5$  Hz, 1H,  $\text{CH}_2$ ), 3.94 (s, 3H,  $\text{OCH}_3$ ), 3.70 (s, 3H,  $\text{OCH}_3$ ), 2.64 – 2.53 (m, 1H, CH), 1.09 (d,  $J = 7.2$  Hz, 3H,  $\text{CH}_3$ ).  $^{13}\text{C NMR}$  (100 MHz,  $\text{CDCl}_3$ ):  $\delta$  192.2 (C=O), 168.4 (C=C), 164.4 (ArO), 159.9 (ArO), 156.9 (ArO), 149.8 (C=N), 135.4 (ArC), 128.9 (Ar), 128.4 (Ar), 126.8 (Ar), 105.5 (C=C), 97.6 (Ar), 91.8 (Ar), 90.9 (C), 90.2 (Ar), 71.2 ( $\text{OCH}_2$ ), 57.0 ( $\text{OCH}_3$ ), 56.6 ( $\text{OCH}_3$ ), 47.6 ( $\text{CH}_2$ ), 34.8 (CH), 11.4 ( $\text{CH}_3$ ). HRMS (ESI):  $m/z$  calcd for  $\text{C}_{23}\text{H}_{22}\text{N}_4\text{O}_5\text{Cl}$ : 469.1279; found: 469.1282  $[\text{M}+\text{H}]^+$ .

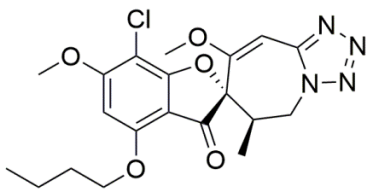

8b

**(2*S*,6'*R*)-7-chloro-4-butoxy-6,8'-dimethoxy-6'-methyl-5',6'-dihydro-3*H*-spiro[benzofuran-2,7'-tetrazole [1,5-*a*] azepine]-3-one (8b)**

Compound **7** (47 mg, 0.1 mmol) was dissolved in anhydrous DMF (1 mL) in a 5 mL round-bottom flask. Subsequently, add 16 mg (0.12 mmol) of *N*-butane bromide and 28 mg (0.2 mmol) of anhydrous potassium carbonate. The resulting mixture was stirred at room temperature overnight. The reaction was monitored by TLC, the mixture was diluted with ethyl acetate (20 ml). Washed with water (20 ml x 2) and brine (10 ml x 1), dried with anhydrous sodium sulfate. The organic phase was directly employed to reduced pressure to remove the solvent, and the resulting residue was purified by flash column chromatography to give pure product **8b** (35.0 mg, 64% yield) by using mixed ethyl acetate and petroleum ether (v:v = 1:3) as eluent.

White solid.  $R_f = 0.3$  (EtOAc : petroleum ether = 1:3).  $^1\text{H NMR}$  (400 MHz,  $\text{CDCl}_3$ ):  $\delta$  6.29 (s, 1H, ArH), 6.16 (s, 1H, C=CH), 4.94 (dd,  $J = 14.7, 7.5$  Hz, 1H,  $\text{CH}_2$ ), 4.69 (dd,  $J = 14.8, 1.8$  Hz, 1H,  $\text{CH}_2$ ), 4.14 (t,  $J = 6.7$  Hz, 2H,  $\text{CH}_2$ ), 4.03 (s, 3H,  $\text{OCH}_3$ ), 3.70 (s, 3H,  $\text{OCH}_3$ ), 2.59 (t,  $J = 7.4$  Hz, 1H, CH), 1.98 – 1.80 (m, 2H,  $\text{CH}_2$ ), 1.54 (m, 2H,  $\text{CH}_2$ ), 1.08 (dd,  $J = 7.3, 1.3$  Hz, 3H,  $\text{CH}_3$ ), 1.00 (td,  $J = 7.4, 1.5$  Hz, 3H,  $\text{CH}_3$ ).  $^{13}\text{C NMR}$  (100 MHz,  $\text{CDCl}_3$ ):  $\delta$  192.1 (C=O), 168.1 (C=C), 164.5 (ArO), 160.0 (ArO), 157.7 (ArO), 149.8 (C=N), 105.1 (C=C), 97.0 (Ar), 90.7 (Ar), 90.5 (C), 90.0 (Ar), 69.3 ( $\text{OCH}_2$ ), 57.0 ( $\text{OCH}_3$ ), 56.6 ( $\text{OCH}_3$ ), 47.6 ( $\text{CH}_2$ ), 34.8 (CH), 30.8 ( $\text{CH}_2$ ), 19.1 ( $\text{CH}_2$ ), 13.8 ( $\text{CH}_3$ ), 11.5 ( $\text{CH}_3$ ). HRMS (ESI):  $m/z$  calcd for  $\text{C}_{20}\text{H}_{24}\text{N}_4\text{O}_5\text{Cl}$ : 435.1435; found: 435.1440  $[\text{M}+\text{H}]^+$ .

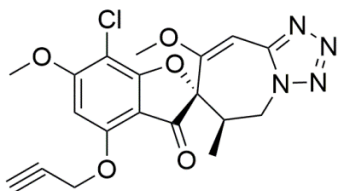

8c

**(2S,6'R)-7-chloro-4-propargyloxy-6,8'-dimethoxy-6'-methyl-5',6'-dihydro-3H-spiro [benzofuran-2,7'-tetrazole [1,5-a] azepine]-3-one (8c)**

Compound **7** (47 mg, 0.1 mmol) was dissolved in anhydrous DMF (1 mL) in a 5 mL round-bottom flask. Subsequently, add 13 mg (0.12 mmol) of 3-bromopropyne and 28 mg (0.2 mmol) of anhydrous potassium carbonate. The resulting mixture was stirred at room temperature overnight. The reaction was monitored by TLC, the mixture was diluted with ethyl acetate (20 ml). Washed with water (20 ml x 2) and brine (10 ml x 1), dried with anhydrous sodium sulfate. The organic phase was directly employed to reduced pressure to remove the solvent, and the resulting residue was purified by flash column chromatography to give pure product **8c** (28.0 mg, 54% yield) by using mixed ethyl acetate and petroleum ether (v:v = 1:3) as eluent.

White solid.  $R_f = 0.2$  (EtOAc : petroleum ether = 1:3).  $^1\text{H NMR}$  (400 MHz,  $\text{CDCl}_3$ ):  $\delta$  6.42 (d,  $J = 1.6$  Hz, 1H, ArH), 6.30 (t,  $J = 2.4$  Hz, 1H, C=CH), 5.04 – 4.85 (m, 1H,  $\text{CH}_2$ ), 4.70 (dt,  $J = 14.7, 2.0$  Hz, 1H,  $\text{CH}_2$ ), 4.05 (d,  $J = 2.4$  Hz, 2H,  $\text{CH}_2$ ), 3.70 (d,  $J = 2.7$  Hz, 1H, CHC), 2.69 (d,  $J = 2.5$  Hz, 1H,  $\text{CH}_2$ ), 2.64 – 2.48 (m, 1H,  $\text{CH}_2$ ), 1.10 – 1.00 (m, 3H,  $\text{CH}_3$ ).  $^{13}\text{C NMR}$  (100 MHz,  $\text{CDCl}_3$ ):  $\delta$  192.3 (C=O), 168.0 (C=C), 164.4 (ArO), 159.7 (ArO), 155.6 (ArO), 149.7 (C=N), 105.3 (C=C), 98.2 (Ar), 92.0 (Ar), 90.9 (C), 90.3 (Ar), 77.7 (CHC), 76.9 (CHC), 57.2 ( $\text{CH}_2$ ), 57.1 ( $\text{OCH}_3$ ), 56.6 ( $\text{OCH}_3$ ), 47.7 ( $\text{CH}_2$ ), 34.7 (CH), 11.3 ( $\text{CH}_3$ ). HRMS (ESI):  $m/z$  calcd for  $\text{C}_{19}\text{H}_{18}\text{N}_4\text{O}_5\text{Cl}$ : 417.0966; found: 417.0975  $[\text{M}+\text{H}]^+$ .



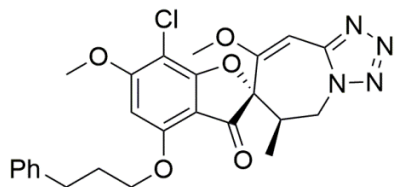

8d

**(2*S*,6'*R*)-7-chloro-4-(3-phenylpropoxy)-6,8'-dimethoxy-6'-methyl-5',6'-dihydro-3*H*-spiro[benzofuran-2,7'-tetrazole [1,5-*a*] azepine]-3-one (8d)**

Compound **7** (47 mg, 0.1 mmol) was dissolved in anhydrous DMF (1 mL) in a 5 mL round-bottom flask. Subsequently, add 24 mg (0.12 mmol) of 3-phenyl-1-bromopropane and 28 mg (0.2 mmol) of anhydrous potassium carbonate. The resulting mixture was stirred at room temperature overnight. The reaction was monitored by TLC, the mixture was diluted with ethyl acetate (20 ml). Washed with water (20 ml x 2) and brine (10 ml x 1), dried with anhydrous sodium sulfate. The organic phase was directly employed to reduced pressure to remove the solvent, and the resulting residue was purified by flash column chromatography to give pure product **8d** (38.0 mg, 61% yield) by using mixed ethyl acetate and petroleum ether (v:v = 1:3) as eluent.

White solid.  $R_f = 0.3$  (EtOAc : petroleum ether = 1:3).  $^1\text{H NMR}$  (400 MHz,  $\text{CDCl}_3$ ):  $\delta$  7.28 (m, 2H, ArH), 7.21 – 7.15 (m, 3H, ArH), 6.29 (d,  $J = 2.9$  Hz, 1H, ArH), 6.08 (s, 1H, C=CH), 4.93 (ddd,  $J = 14.8, 7.4, 2.7$  Hz, 1H,  $\text{CH}_2$ ), 4.76 – 4.61 (m, 1H,  $\text{CH}_2$ ), 4.13 (tt,  $J = 6.5, 3.6$  Hz, 2H,  $\text{CH}_2$ ), 3.95 (d,  $J = 1.7$  Hz, 3H,  $\text{OCH}_3$ ), 3.69 (s, 3H,  $\text{OCH}_3$ ), 2.92 – 2.78 (m, 2H,  $\text{CH}_2$ ), 2.58 (tt,  $J = 7.4, 2.0$  Hz, 1H, CH), 2.34 – 2.17 (m, 2H,  $\text{CH}_2$ ), 1.08 (dd,  $J = 7.2, 2.8$  Hz, 3H,  $\text{CH}_3$ ).  $^{13}\text{C NMR}$  (100 MHz,  $\text{CDCl}_3$ ):  $\delta$  192.2 (C=O), 168.0 (C=C), 164.5 (ArO), 160.0 (ArO), 157.5 (ArO), 149.8 (C=N), 140.9 (Ar), 128.6 (Ar), 128.5 (Ar), 126.1 (Ar), 105.1 (C=C), 97.1 (Ar), 90.8 (C), 90.7 (Ar), 90.0 (Ar), 68.2 ( $\text{CH}_2$ ), 57.1 ( $\text{OCH}_3$ ), 56.6 ( $\text{OCH}_3$ ), 47.6 ( $\text{CH}_2$ ), 34.8 (CH), 31.6 ( $\text{CH}_2$ ), 30.1 ( $\text{CH}_2$ ), 11.4 ( $\text{CH}_3$ ). HRMS (ESI):  $m/z$  calcd for  $\text{C}_{25}\text{H}_{26}\text{N}_4\text{O}_5\text{Cl}$ : 497.1592; found: 497.1585  $[\text{M}+\text{H}]^+$ .

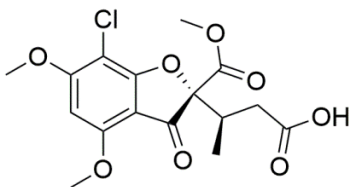

9

**(R)-3-((R)-7-chloro-4,6-dimethoxy-2-(methoxycarbonyl)-3-oxo-2,3-dihydrobenzofuran-2-yl)butanoic acid (9)**

Griseofulvin **1** (211 mg, 0.6 mmol) was dissolved in mixed acetonitrile and water (v:v = 6:1) (3.5 mL) in a 25 mL round-bottom flask. Subsequently, add 193 mg (0.9 mmol) of sodium periodate and 5 mg (0.02 mmol) of ruthenium trichloride. The resulting mixture was stirred at 60 °C overnight. The reaction was monitored by TLC, the mixture was quenched with saturated sodium thiosulfate. The aqueous phase was extracted with ethyl acetate (10 ml x 3), the organic phases were combined, and then washed with water (20 ml x 2) and brine (10 ml x 1), dried with anhydrous sodium sulfate. The organic phase was directly employed to reduced pressure to remove the solvent, and the resulting residue was purified by flash column chromatography to give pure product **9** (185.0 mg, 83% yield) by using mixed ethyl acetate and petroleum ether (v:v = 3:1) as eluent.

White solid.  $R_f = 0.1$  (EtOAc : petroleum ether = 3:1).  $^1\text{H NMR}$  (400 MHz,  $\text{CDCl}_3$ ):  $\delta$  7.78 (s, 1H, COOH), 6.14 (s, 1H, ArH), 4.10 – 3.99 (m, 3H,  $\text{OCH}_3$ ), 3.96 (dd,  $J = 4.0, 1.9$  Hz, 3H,  $\text{OCH}_3$ ), 3.77 (dd,  $J = 4.2, 2.0$  Hz, 3H,  $\text{OCH}_3$ ), 3.19 (ddq,  $J = 10.1, 6.3, 3.1$  Hz, 1H, CH), 2.32 (ddt,  $J = 16.1, 5.7, 3.0$  Hz, 1H,  $\text{CH}_2$ ), 2.13 (dddd,  $J = 15.8, 13.7, 6.1, 3.4$  Hz, 1H,  $\text{CH}_2$ ), 1.20 (td,  $J = 6.9, 6.3, 2.4$  Hz, 3H,  $\text{CH}_3$ ).  $^{13}\text{C NMR}$  (100 MHz,  $\text{CDCl}_3$ ):  $\delta$  189.8 (C=O), 176.9(COO), 168.8(COO), 165.5 (ArO), 164.9 (ArO), 158.0 (ArO), 104.4 (Ar), 97.7 (Ar), 95.3 (Ar), 89.9(C), 57.1 ( $\text{OCH}_3$ ), 56.4 ( $\text{OCH}_3$ ), 53.4 ( $\text{OCH}_3$ ), 34.8 (CH), 14.6 ( $\text{CH}_3$ ). HRMS (ESI):  $m/z$  calcd for  $\text{C}_{16}\text{H}_{17}\text{O}_8\text{NaCl}$ : 395.0510; found: 395.050  $[\text{M}+\text{Na}]^+$ .

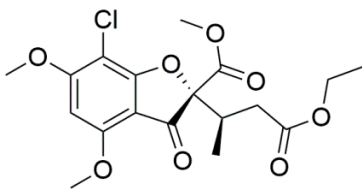

10a

**Methyl (R)-7-chloro-2-((R)-4-ethoxy-4-oxobutan-2-yl)-4,6-dimethoxy-3-oxo-2,3-dihydrobenzofuran-2-carboxylate (10a)**

Compound **9** (142 mg, 0.38 mmol) was dissolved in anhydrous DCM (2 mL) in a 5 mL round-bottom flask. Subsequently, add 480 mg (1.9 mmol) of EDCI and 6 mg (0.05 mmol) of DMAP. After stirring for half an hour, add 92 mg (2 mmol) of ethanol. The resulting mixture was stirred at room temperature overnight. The reaction was monitored by TLC, the mixture was diluted with DCM (20 ml). Washed with water (20 ml x 2) and brine (10 ml x 1), dried with anhydrous sodium sulfate. The organic phase was directly employed to reduced pressure to remove the solvent, and the resulting residue was purified by flash column chromatography to give pure product **10a** (134.0 mg, 88% yield) by using mixed ethyl acetate and petroleum ether (v:v = 1:1) as eluent.

White solid.  $R_f = 0.3$  (EtOAc : petroleum ether = 1:1).  $^1\text{H NMR}$  (400 MHz,  $\text{CDCl}_3$ ):  $\delta$  6.07 (s, 1H, ArH), 4.02 (qd,  $J = 7.1, 4.3$  Hz, 2H,  $\text{OCH}_2$ ), 3.95 (s, 3H,  $\text{OCH}_3$ ), 3.89 (s, 3H,  $\text{OCH}_3$ ), 3.70 (s, 3H,  $\text{OCH}_3$ ), 3.15 (dtd,  $J = 13.6, 6.8, 3.2$  Hz, 1H, CH), 2.20 (dd,  $J = 15.5, 3.2$  Hz, 1H,  $\text{CH}_2$ ), 2.03 (dd,  $J = 15.4, 10.9$  Hz, 1H,  $\text{CH}_2$ ), 1.14 (t,  $J = 7.1$  Hz, 3H,  $\text{CH}_3$ ), 1.12 (d,  $J = 6.8$  Hz, 3H,  $\text{CH}_3$ ).  $^{13}\text{C NMR}$  (100 MHz,  $\text{CDCl}_3$ ):  $\delta$  189.8 (C=O), 171.2 (COO), 168.9 (COO), 165.5 (ArO), 164.8 (ArO), 157.9 (ArO), 104.5 (Ar), 97.8 (Ar), 95.5 (Ar), 89.8 (C), 60.6 ( $\text{OCH}_3$ ), 57.1 ( $\text{OCH}_3$ ), 56.4 ( $\text{OCH}_3$ ), 53.4 ( $\text{OCH}_2$ ), 35.0 ( $\text{CH}_2$ ), 35.0 (CH), 14.6 ( $\text{CH}_3$ ), 14.1 ( $\text{CH}_3$ ). HRMS (ESI):  $m/z$  calcd for  $\text{C}_{18}\text{H}_{21}\text{O}_8\text{NaCl}$ : 423.0823; found: 423.0820  $[\text{M}+\text{Na}]^+$ .

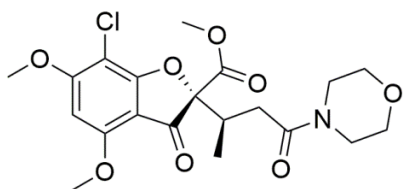

10b

**methyl (R)-7-chloro-4,6-dimethoxy-2-((R)-4-morpholino-4-oxobutan-2-yl)-3-oxo-2,3-dihydrobenzofuran-2-carboxylate (10b)**

Compound **9** (142 mg, 0.38 mmol) was dissolved in anhydrous DMF (2 mL) in a 5 mL round-bottom flask. Subsequently, add 100 mg (0.76 mmol) of DIPEA and 218 mg (0.57 mmol) of HATU. After stirring for half an hour, add 36 mg (0.4 mmol) of morpholine. The resulting mixture was stirred at room temperature overnight. The reaction was monitored by TLC, the mixture was diluted with ethyl acetate (20 ml). Washed with water (20 ml x 2) and brine (10 ml x 1), dried with anhydrous sodium sulfate. The organic phase was directly employed to reduced pressure to remove the solvent, and the resulting residue was purified by flash column chromatography to give pure product **10b** (114.0 mg, 72% yield) by using mixed ethyl acetate and petroleum ether (v:v = 2:1) as eluent.

White solid.  $R_f = 0.3$  (EtOAc : petroleum ether = 2:1).  $^1\text{H NMR}$  (400 MHz,  $\text{CDCl}_3$ ):  $\delta$  6.14 (s, 1H, ArH), 4.03 (s, 3H,  $\text{OCH}_3$ ), 3.98 (s, 3H,  $\text{OCH}_3$ ), 3.77 (s, 3H,  $\text{OCH}_3$ ), 3.64 (d,  $J = 4.4$  Hz, 4H,  $\text{CH}_2$ ), 3.61 – 3.53 (m, 2H,  $\text{CH}_2$ ), 3.41 (d,  $J = 4.9$  Hz, 2H,  $\text{CH}_2$ ), 3.22 – 3.13 (m, 2H,  $\text{CH}_2$ ), 2.36 (d,  $J = 14.4$  Hz, 1H, CH), 2.20 – 2.10 (m, 2H,  $\text{CH}_2$ ), 1.17 (dd,  $J = 6.8, 2.0$  Hz, 3H,  $\text{CH}_3$ ).  $^{13}\text{C NMR}$  (100 MHz,  $\text{CDCl}_3$ ):  $\delta$  190.3 (C=O), 169.2 (C=ON), 168.9 (COO), 165.7 (ArO), 164.9 (ArO), 157.9 (ArO), 104.5 (Ar), 97.8 (Ar), 95.5 (Ar), 89.8 (C), 66.9 ( $\text{OCH}_2$ ), 66.7 ( $\text{OCH}_2$ ), 57.1 ( $\text{OCH}_3$ ), 56.4 ( $\text{OCH}_3$ ), 53.4 ( $\text{OCH}_3$ ), 46.1 ( $\text{CH}_2$ ), 42.0 ( $\text{CH}_2$ ), 35.0 ( $\text{CH}_2$ ), 33.5 ( $\text{CH}_2$ ), 14.4 ( $\text{CH}_3$ ). HRMS (ESI): m/z calcd for  $\text{C}_{20}\text{H}_{25}\text{NO}_8\text{Cl}$ : 442.1269; found: 442.1269  $[\text{M}+\text{H}]^+$ .

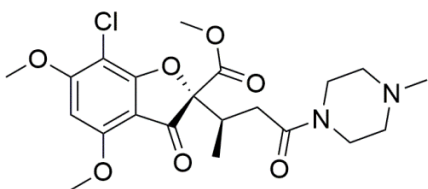

10c

**methyl (R)-7-chloro-4,6-dimethoxy-2-((R)-4-(4-methylpiperazin-1-yl)-4-oxobutan-2-yl)-3-oxo-2,3-dihydrobenzofuran-2-carboxylate (10c)**

Compound **9** (142 mg, 0.38 mmol) was dissolved in anhydrous DMF (2 mL) in a 5 mL round-bottom flask. Subsequently, add 100 mg (0.76 mmol) of DIPEA and 218 mg (0.57 mmol) of HATU. After stirring for half an hour, add 40 mg (0.4 mmol) of 1-methylpiperazine. The resulting mixture was stirred at room temperature overnight. The reaction was monitored by TLC, the mixture was diluted with ethyl acetate (20 ml). Washed with water (20 ml x 2) and brine (10 ml x 1), dried with anhydrous sodium sulfate. The organic phase was directly employed to reduced pressure to remove the solvent, and the resulting residue was purified by flash column chromatography to give pure product **10c** (159.0 mg, 92% yield) by using mixed methanol and dichloromethane (v:v = 1:30) as eluent.

White solid.  $R_f = 0.3$  (MeOH : DCM = 1:30).  $^1\text{H NMR}$  (400 MHz,  $\text{CDCl}_3$ ):  $\delta$  6.13 (s, 1H, ArH), 4.03 (s, 3H,  $\text{OCH}_3$ ), 3.97 (s, 3H,  $\text{OCH}_3$ ), 3.77 (s, 3H,  $\text{OCH}_3$ ), 3.61 (dtd,  $J = 18.7, 12.9, 7.0$  Hz, 2H,  $\text{CH}_2$ ), 3.44 (tq,  $J = 14.2, 9.0, 7.0$  Hz, 2H,  $\text{CH}_2$ ), 3.18 (ddd,  $J = 11.1, 8.4, 2.9$  Hz, 1H, CH), 2.43 – 2.33 (m, 4H,  $\text{CH}_2$ ), 2.31 (s, 3H,  $\text{CH}_3$ ), 2.15 (dd,  $J = 14.3, 11.3$  Hz, 2H,  $\text{CH}_2$ ), 1.17 (d,  $J = 6.8$  Hz, 3H,  $\text{CH}_3$ ).  $^{13}\text{C NMR}$  (100 MHz,  $\text{CDCl}_3$ ):  $\delta$  190.3 (C=O), 168.9 (C=ON), 165.7 (ArO), 164.8 (ArO), 157.9 (ArO), 104.6 (Ar), 97.8 (Ar), 95.6 (Ar), 89.8 (C), 57.1 ( $\text{OCH}_3$ ), 56.4 ( $\text{OCH}_3$ ), 55.2 ( $\text{OCH}_3$ ), 54.7 ( $\text{CH}_2$ ), 53.4 ( $\text{CH}_2$ ), 46.0 ( $\text{CH}_2$ ), 45.6 ( $\text{CH}_2$ ), 41.6 ( $\text{CH}_2$ ), 35.1 (CH), 33.7 ( $\text{CH}_3$ ), 14.4 ( $\text{CH}_3$ ). HRMS (ESI):  $m/z$  calcd for  $\text{C}_{21}\text{H}_{28}\text{N}_2\text{O}_7\text{Cl}$ : 455.1585; found: 455.1586  $[\text{M}+\text{H}]^+$ .

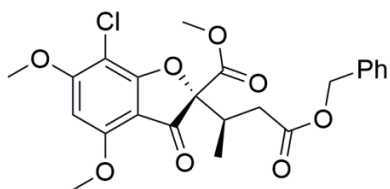

10d

**methyl (R)-7-chloro-4,6-dimethoxy-2-((R)-4-(4-methylpiperazin-1-yl)-4-oxobutan-2-yl)-3-oxo-2,3-dihydrobenzofuran-2-carboxylate (10d)**

Compound **9** (142 mg, 0.38 mmol) was dissolved in anhydrous DCM (2 mL) in a 5 mL round-bottom flask. Subsequently, add 480 mg (1.9 mmol) of EDCI and 6 mg (0.05 mmol) of DMAP. After stirring for half an hour, add 216 mg (2 mmol) of phenylmethanol. The resulting mixture was stirred at room temperature overnight. The reaction was monitored by TLC, the mixture was diluted with DCM (20 ml). Washed with water (20 ml x 2) and brine (10 ml x 1), dried with anhydrous sodium sulfate. The organic phase was directly employed to reduced pressure to remove the solvent, and the resulting residue was purified by flash column chromatography to give pure product **10d** (92.0 mg, 53% yield) by using mixed ethyl acetate and petroleum ether (v:v = 1:1) as eluent.

White solid.  $R_f = 0.4$  (EtOAc : petroleum ether = 1:1).  $^1\text{H NMR}$  (400 MHz,  $\text{CDCl}_3$ ):  $\delta$  7.39 – 7.27 (m, 5H, ArH), 6.10 (s, 1H, ArH), 5.13 – 4.99 (m, 2H,  $\text{CH}_2$ ), 3.99 (s, 3H,  $\text{OCH}_3$ ), 3.93 (s, 3H,  $\text{OCH}_3$ ), 3.75 (s, 3H,  $\text{OCH}_3$ ), 3.25 (qd,  $J = 6.5, 6.0, 2.6$  Hz, 1H,  $\text{CH}_2$ ), 2.33 (dd,  $J = 15.7, 3.3$  Hz, 1H,  $\text{CH}_2$ ), 2.17 (ddd,  $J = 15.5, 10.7, 1.4$  Hz, 1H, CH), 1.19 (dd,  $J = 6.9, 1.6$  Hz, 3H,  $\text{CH}_3$ ).  $^{13}\text{C NMR}$  (100 MHz,  $\text{CDCl}_3$ ):  $\delta$  189.8 (C=O), 171.1 (COO), 168.9 (COO), 165.5(ArO), 164.8(ArO), 158.0(ArO), 135.6 (Ar), 128.6 (Ar), 128.3 (Ar), 127.0 (Ar), 104.4 (Ar), 97.7 (Ar), 95.5 (Ar), 89.8 (C), 66.5 ( $\text{CH}_2$ ), 57.1 ( $\text{OCH}_3$ ), 56.4 ( $\text{OCH}_3$ ), 53.4 ( $\text{OCH}_3$ ), 35.0 (CH), 14.6 ( $\text{CH}_3$ ). HRMS (ESI):  $m/z$  calcd for  $\text{C}_{23}\text{H}_{23}\text{O}_8\text{NaCl}$ : 485.0979; found: 485.0977  $[\text{M}+\text{Na}]^+$ .

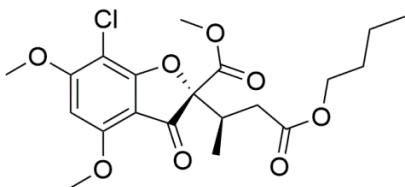

10e

**methyl (R)-2-((R)-4-butoxy-4-oxobutan-2-yl)-7-chloro-4,6-dimethoxy-3-oxo-2,3-dihydrobenzofuran-2-carboxylate (10e)**

Compound **9** (142 mg, 0.38 mmol) was dissolved in anhydrous DCM (2 mL) in a 5 mL round-bottom flask. Subsequently, add 480 mg (1.9 mmol) of EDCI and 6 mg (0.05 mmol) of DMAP. After stirring for half an hour, add 148 mg (2 mmol) of butan-1-ol. The resulting mixture was stirred at room temperature overnight. The reaction was monitored by TLC, the mixture was diluted with DCM (20 ml). Washed with water (20 ml x 2) and brine (10 ml x 1), dried with anhydrous sodium sulfate. The organic phase was directly employed to reduced pressure to remove the solvent, and the resulting residue was purified by flash column chromatography to give pure product **10e** (74.0 mg, 57% yield) by using mixed ethyl acetate and petroleum ether (v:v = 1:1) as eluent.

White solid.  $R_f = 0.5$  (EtOAc : petroleum ether = 1:1).  $^1\text{H NMR}$  (400 MHz,  $\text{CDCl}_3$ ):  $\delta$  6.15 (s, 1H, ArH), 4.07 – 4.04 (m, 2H,  $\text{CH}_2$ ), 4.03 (s, 3H,  $\text{OCH}_3$ ), 3.97 (s, 3H,  $\text{OCH}_3$ ), 3.78 (s, 3H,  $\text{OCH}_3$ ), 3.29 – 3.15 (m, 1H,  $\text{CH}_2$ ), 2.28 (dd,  $J = 15.5, 3.2$  Hz, 1H,  $\text{CH}_2$ ), 2.11 (dd,  $J = 15.4, 11.0$  Hz, 1H, CH), 1.63 – 1.50 (m, 2H,  $\text{CH}_2$ ), 1.34 (q,  $J = 7.5$  Hz, 2H,  $\text{CH}_2$ ), 1.19 (d,  $J = 6.8$  Hz, 3H,  $\text{CH}_3$ ), 0.91 (t,  $J = 7.4$  Hz, 3H,  $\text{CH}_3$ ).  $^{13}\text{C NMR}$  (100 MHz,  $\text{CDCl}_3$ ):  $\delta$  189.8 (C=O), 171.3 (COO), 168.9 (COO), 165.5 (ArO), 164.8 (ArO), 157.9 (ArO), 104.4 (Ar), 97.8 (Ar), 95.5 (Ar), 89.8 (C), 64.5 ( $\text{CH}_2$ ), 57.1 ( $\text{OCH}_3$ ), 56.4 ( $\text{OCH}_3$ ), 53.4 ( $\text{OCH}_3$ ), 35.0 (CH), 34.9 ( $\text{CH}_2$ ), 30.6 ( $\text{CH}_2$ ), 19.1 ( $\text{CH}_2$ ), 14.6 ( $\text{CH}_3$ ), 13.7 ( $\text{CH}_3$ ). HRMS (ESI):  $m/z$  calcd for  $\text{C}_{20}\text{H}_{25}\text{O}_8\text{NaCl}$ : 451.1136; found: 451.1134  $[\text{M}+\text{Na}]^+$ .

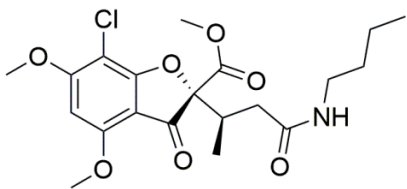

10f

**methyl (R)-2-((R)-4-(butylamino)-4-oxobutan-2-yl)-7-chloro-4,6-dimethoxy-3-oxo-2,3-dihydrobenzofuran-2-carboxylate (10f)**

Compound **9** (142 mg, 0.38 mmol) was dissolved in anhydrous DMF (2 mL) in a 5 mL round-bottom flask. Subsequently, add 100 mg (0.76 mmol) of DIPEA and 218 mg (0.57 mmol) of HATU. After stirring for half an hour, add 29 mg (0.4 mmol) of butan-1-amine. The resulting mixture was stirred at room temperature overnight. The reaction was monitored by TLC, the mixture was diluted with ethyl acetate (20 ml). Washed with water (20 ml x 2) and brine (10 ml x 1), dried with anhydrous sodium sulfate. The organic phase was directly employed to reduced pressure to remove the solvent, and the resulting residue was purified by flash column chromatography to give pure product **10f** (142.0 mg, 93% yield) by using mixed ethyl acetate and petroleum ether (v:v = 2:1) as eluent.

White solid.  $R_f = 0.25$  (EtOAc : petroleum ether = 2:1).  $^1\text{H NMR}$  (400 MHz,  $\text{CDCl}_3$ ):  $\delta$  6.13 (s, 1H, ArH), 5.49 (t,  $J = 5.3$  Hz, 1H, NH), 4.02 (s, 3H,  $\text{OCH}_3$ ), 3.97 (s, 3H,  $\text{OCH}_3$ ), 3.77 (s, 3H,  $\text{OCH}_3$ ), 3.24 – 3.18 (m, 2H,  $\text{CH}_2$ ), 3.16 – 3.12 (m, 1H, CH), 2.20 (dd,  $J = 13.9, 3.3$  Hz, 1H,  $\text{CH}_2$ ), 1.90 (dd,  $J = 13.9, 11.2$  Hz, 1H,  $\text{CH}_2$ ), 1.49 – 1.38 (m, 2H,  $\text{CH}_2$ ), 1.37 – 1.25 (m, 2H,  $\text{CH}_2$ ), 1.17 (d,  $J = 6.8$  Hz, 3H,  $\text{CH}_3$ ), 0.90 (t,  $J = 7.3$  Hz, 3H,  $\text{CH}_3$ ).  $^{13}\text{C NMR}$  (100 MHz,  $\text{CDCl}_3$ ):  $\delta$  190.2 (C=O), 170.3 (C=ON), 168.9 (COO), 165.7 (ArO), 164.8 (ArO), 157.9 (ArO), 104.6 (=CC=O), 97.8 (Ar), 95.5 (Ar), 89.8 (C), 57.1 ( $\text{OCH}_3$ ), 56.4 ( $\text{OCH}_3$ ), 53.4 ( $\text{OCH}_3$ ), 39.3 (CH), 37.1 ( $\text{CH}_2$ ), 36.0 ( $\text{CH}_2$ ), 31.6 ( $\text{CH}_2$ ), 20.0 ( $\text{CH}_2$ ), 14.3 ( $\text{CH}_3$ ), 13.7 ( $\text{CH}_3$ ). HRMS (ESI):  $m/z$  calcd for  $\text{C}_{20}\text{H}_{27}\text{NO}_7\text{Cl}$ : 428.1476; found: 428.1471  $[\text{M}+\text{H}]^+$ .



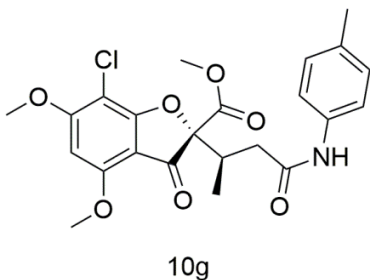

**methyl (R)-7-chloro-4,6-dimethoxy-3-oxo-2-((R)-4-oxo-4-(p-tolylamino)butan-2-yl)-2,3-dihydrobenzofuran-2-carboxylate (10g)**

Compound **9** (142 mg, 0.38 mmol) was dissolved in anhydrous DMF (2 mL) in a 5 mL round-bottom flask. Subsequently, add 100 mg (0.76 mmol) of DIPEA and 218 mg (0.57 mmol) of HATU. After stirring for half an hour, add 43 mg (0.4 mmol) of *p*-toluidine. The resulting mixture was stirred at room temperature overnight. The reaction was monitored by TLC, the mixture was diluted with ethyl acetate (20 ml). Washed with water (20 ml x 2) and brine (10 ml x 1), dried with anhydrous sodium sulfate. The organic phase was directly employed to reduced pressure to remove the solvent, and the resulting residue was purified by flash column chromatography to give pure product **10g** (140.0 mg, 88% yield) by using mixed ethyl acetate and petroleum ether (v:v = 1:1) as eluent.

White solid.  $R_f = 0.2$  (EtOAc : petroleum ether = 1:1).  $^1\text{H NMR}$  (400 MHz,  $\text{CDCl}_3$ ):  $\delta$  7.36 (s, 1H, NH), 7.34 (d,  $J = 3.1$  Hz, 2H, ArH), 7.09 (d,  $J = 8.3$  Hz, 2H, ArH), 6.12 (s, 1H, ArH), 4.02 (s, 3H,  $\text{OCH}_3$ ), 3.96 (s, 3H,  $\text{OCH}_3$ ), 3.75 (s, 3H,  $\text{OCH}_3$ ), 3.28 (ddp,  $J = 10.5, 6.7, 3.3$  Hz, 1H, CH), 2.44 (dd,  $J = 14.1, 3.8$  Hz, 1H,  $\text{CH}_2$ ), 2.29 (s, 3H,  $\text{CH}_3$ ), 2.11 (dd,  $J = 14.1, 10.6$  Hz, 1H,  $\text{CH}_2$ ), 1.22 (d,  $J = 6.8$  Hz, 3H,  $\text{CH}_3$ ).  $^{13}\text{C NMR}$  (100 MHz,  $\text{CDCl}_3$ ):  $\delta$  190.5 (C=O), 168.9 (C=ON), 168.5 (COO), 165.7 (ArO), 164.9 (ArO), 158.0 (ArO), 135.2 (Ar), 133.9 (Ar), 129.4 (Ar), 119.8 (Ar), 104.7 (Ar), 97.8 (Ar), 95.3 (Ar), 89.8 (C), 57.1 ( $\text{OCH}_3$ ), 56.4 ( $\text{OCH}_3$ ), 53.5 ( $\text{OCH}_3$ ), 38.2 (CH), 35.9 ( $\text{CH}_2$ ), 20.9 ( $\text{CH}_3$ ), 14.5 ( $\text{CH}_3$ ). HRMS (ESI):  $m/z$  calcd for  $\text{C}_{23}\text{H}_{25}\text{NO}_7\text{Cl}$ : 462.1320; found: 462.1321  $[\text{M}+\text{H}]^+$ .

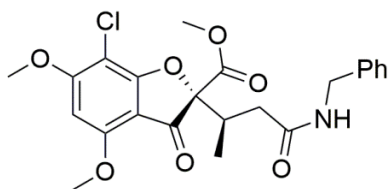

10h

**methyl (R)-2-((R)-4-(benzylamino)-4-oxobutan-2-yl)-7-chloro-4,6-dimethoxy-3-oxo-2,3-dihydrobenzofuran-2-carboxylate (10h)**

Compound **9** (142 mg, 0.38 mmol) was dissolved in anhydrous DMF (2 mL) in a 5 mL round-bottom flask. Subsequently, add 100 mg (0.76 mmol) of DIPEA and 218 mg (0.57 mmol) of HATU. After stirring for half an hour, add 43 mg (0.4 mmol) of phenylmethanamine. The resulting mixture was stirred at room temperature overnight. The reaction was monitored by TLC, the mixture was diluted with ethyl acetate (20 ml). Washed with water (20 ml x 2) and brine (10 ml x 1), dried with anhydrous sodium sulfate. The organic phase was directly employed to reduced pressure to remove the solvent, and the resulting residue was purified by flash column chromatography to give pure product **10h** (126.0 mg, 72% yield) by using mixed ethyl acetate and petroleum ether (v:v = 2:1) as eluent.

White solid.  $R_f = 0.25$  (EtOAc : petroleum ether = 2:1).  $^1\text{H NMR}$  (400 MHz,  $\text{CDCl}_3$ ):  $\delta$  7.37 – 7.34 (m, 1H, ArH), 7.33 – 7.27 (m, 2H, ArH), 7.26 – 7.20 (m, 2H, ArH), 6.11 (s, 1H, ArH), 5.83 (s, 1H, ArH), 4.48 – 4.29 (m, 2H,  $\text{CH}_2$ ), 4.01 (s, 3H,  $\text{OCH}_3$ ), 3.94 (s, 3H,  $\text{OCH}_3$ ), 3.76 (s, 3H,  $\text{OCH}_3$ ), 3.29 – 3.11 (m, 1H, CH), 2.24 (dd,  $J = 14.1, 3.2$  Hz, 1H,  $\text{CH}_2$ ), 1.95 (dd,  $J = 14.1, 11.1$  Hz, 1H,  $\text{CH}_2$ ), 1.18 (d,  $J = 6.8$  Hz, 3H,  $\text{CH}_3$ ).  $^{13}\text{C NMR}$  (100 MHz,  $\text{CDCl}_3$ ):  $\delta$  190.3 (C=O), 170.3 (C=ON), 168.9 (COO), 165.7 (ArO), 164.9 (ArO), 158.0 (ArO), 138.0 (Ar), 128.7 (Ar), 127.8 (Ar), 127.5 (Ar), 104.5 (Ar), 97.8 (Ar), 95.5 (Ar), 89.8 (C), 57.1 ( $\text{OCH}_3$ ), 56.4 ( $\text{OCH}_3$ ), 53.5 ( $\text{OCH}_3$ ), 43.7 ( $\text{CH}_2$ ), 37.0 (CH), 35.9 ( $\text{CH}_2$ ), 14.4 ( $\text{CH}_3$ ). HRMS (ESI):  $m/z$  calcd for  $\text{C}_{23}\text{H}_{25}\text{NO}_7\text{Cl}$ : 462.1320; found: 462.1317  $[\text{M}+\text{H}]^+$ .

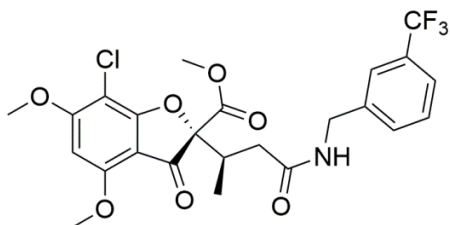

10i

**methyl (R)-7-chloro-4,6-dimethoxy-3-oxo-2-((R)-4-oxo-4-((3-(trifluoromethyl)benzyl)amino)butan-2-yl)-2,3-dihydrobenzofuran-2-carboxylate (10i)**

Compound **9** (142 mg, 0.38 mmol) was dissolved in anhydrous DMF (2 mL) in a 5 mL round-bottom flask. Subsequently, add 100 mg (0.76 mmol) of DIPEA and 218 mg (0.57 mmol) of HATU. After stirring for half an hour, add 60 mg (0.4 mmol) of (3-(trifluoromethyl)phenyl)methanamine. The resulting mixture was stirred at room temperature overnight. The reaction was monitored by TLC, the mixture was diluted with ethyl acetate (20 ml). Washed with water (20 ml x 2) and brine (10 ml x 1), dried with anhydrous sodium sulfate. The organic phase was directly employed to reduced pressure to remove the solvent, and the resulting residue was purified by flash column chromatography to give pure product **10i** (151.0 mg, 75% yield) by using mixed ethyl acetate and petroleum ether (v:v = 2:1) as eluent.

White solid.  $R_f = 0.3$  (EtOAc : petroleum ether = 2:1).  $^1\text{H NMR}$  (400 MHz,  $\text{CDCl}_3$ ):  $\delta$  7.54 – 7.50 (m, 1H, ArH), 7.48 (s, 1H, ArH), 7.46 – 7.39 (m, 2H, ArH), 6.12 (s, 1H, ArH), 5.99 (t,  $J = 6.0$  Hz, 1H, NH), 4.54 – 4.36 (m, 2H,  $\text{CH}_2$ ), 4.01 (s, 3H,  $\text{OCH}_3$ ), 3.95 (s, 3H,  $\text{OCH}_3$ ), 3.76 (s, 3H,  $\text{OCH}_3$ ), 3.32 – 3.08 (m, 1H, CH), 2.28 (dd,  $J = 14.1, 3.3$  Hz, 1H,  $\text{CH}_2$ ), 1.99 (dd,  $J = 14.1, 10.9$  Hz, 1H,  $\text{CH}_2$ ), 1.18 (d,  $J = 6.8$  Hz, 3H,  $\text{CH}_3$ ).  $^{13}\text{C NMR}$  (100 MHz,  $\text{CDCl}_3$ ):  $\delta$  190.3 (C=O), 170.6 (C=ON), 168.9 (COO), 165.6 (ArO), 165.0 (ArO), 158.0 (ArO), 139.2 (Ar), 131.2 (Ar), 131.2 (Ar), 129.2 (Ar), 124.4 ( $\text{CF}_3$ ), 124.4 (Ar), 124.3 (Ar), 104.5 (Ar), 97.8 (Ar), 95.4 (Ar), 89.8 (C), 57.1 ( $\text{OCH}_3$ ), 56.4 ( $\text{OCH}_3$ ), 53.5 ( $\text{OCH}_3$ ), 43.1 ( $\text{CH}_2$ ), 37.0 (CH), 35.9 ( $\text{CH}_2$ ), 14.4 ( $\text{CH}_3$ ). HRMS (ESI):  $m/z$  calcd for  $\text{C}_{24}\text{H}_{24}\text{NO}_7\text{ClF}_3$ : 530.1193; found: 530.1190  $[\text{M}+\text{H}]^+$ .

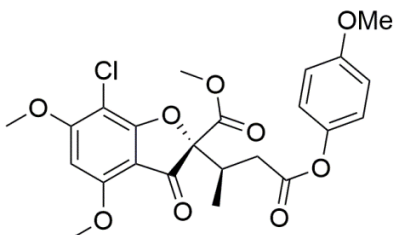

10j

**methyl (R)-7-chloro-4,6-dimethoxy-2-((R)-4-(4-methoxyphenoxy)-4-oxobutan-2-yl)-3-oxo-2,3-dihydrobenzofuran-2-carboxylate (10j)**

Compound **9** (142 mg, 0.38 mmol) was dissolved in anhydrous DCM (2 mL) in a 5 mL round-bottom flask. Subsequently, add 480 mg (1.9 mmol) of EDCI and 6 mg (0.05 mmol) of DMAP. After stirring for half an hour, add 248 mg (2 mmol) of 4-methoxyphenol. The resulting mixture was stirred at room temperature overnight. The reaction was monitored by TLC, the mixture was diluted with DCM (20 ml). Washed with water (20 ml x 2) and brine (10 ml x 1), dried with anhydrous sodium sulfate. The organic phase was directly employed to reduced pressure to remove the solvent, and the resulting residue was purified by flash column chromatography to give pure product **10j** (93.0 mg, 53% yield) by using mixed ethyl acetate and petroleum ether (v:v = 1:1) as eluent.

White solid.  $R_f = 0.25$  (EtOAc : petroleum ether = 1:1).  $^1\text{H NMR}$  (400 MHz,  $\text{CDCl}_3$ ):  $\delta$  6.99 – 6.92 (m, 2H, ArH), 6.89 – 6.83 (m, 2H, ArH), 6.13 (s, 1H, ArH), 4.02 (s, 3H,  $\text{OCH}_3$ ), 3.97 (s, 3H,  $\text{OCH}_3$ ), 3.79 (s, 3H,  $\text{OCH}_3$ ), 3.78 (s, 3H,  $\text{OCH}_3$ ), 3.35 (ddt,  $J = 10.3, 6.9, 3.4$  Hz, 1H, CH), 2.54 (dd,  $J = 15.7, 3.3$  Hz, 1H,  $\text{CH}_2$ ), 2.34 (dd,  $J = 15.7, 10.8$  Hz, 1H,  $\text{CH}_2$ ), 1.29 (d,  $J = 6.8$  Hz, 3H,  $\text{CH}_3$ ).  $^{13}\text{C NMR}$  (100 MHz,  $\text{CDCl}_3$ ):  $\delta$  189.8 (C=O), 170.2 (COO), 168.9 (COO), 165.5 (ArO), 164.9 (ArO), 158.0 (ArO), 157.3 (Ar), 144.0 (Ar), 122.2 (Ar), 114.4 (Ar), 104.5 (Ar), 97.9 (Ar), 95.4 (Ar), 89.8 (C), 57.1 ( $\text{OCH}_3$ ), 56.4 ( $\text{OCH}_3$ ), 55.6 ( $\text{OCH}_3$ ), 53.5 ( $\text{OCH}_3$ ), 35.0 (CH), 35.0 ( $\text{CH}_2$ ), 14.7 ( $\text{CH}_3$ ). HRMS (ESI): m/z calcd for  $\text{C}_{23}\text{H}_{23}\text{O}_9\text{NaCl}$ : 501.0928; found: 501.0926  $[\text{M}+\text{Na}]^+$ .

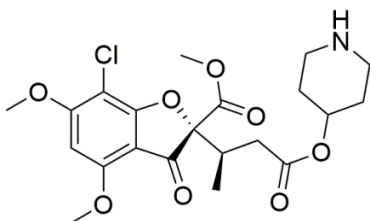

10k

**methyl (R)-7-chloro-4,6-dimethoxy-3-oxo-2-((R)-4-oxo-4-(piperidin-4-yloxy)butan-2-yl)-2,3-dihydrobenzofuran-2-carboxylate (10k)**

Compound **9** (142 mg, 0.38 mmol) was dissolved in anhydrous DCM (2 mL) in a 5 mL round-bottom flask. Subsequently, add 480 mg (1.9 mmol) of EDCI and 6 mg (0.05 mmol) of DMAP. After stirring for half an hour, add 202 mg (2 mmol) of piperidin-4-ol. The resulting mixture was stirred at room temperature overnight. The reaction was monitored by TLC, the mixture was diluted with DCM (20 ml). Washed with water (20 ml x 2) and brine (10 ml x 1), dried with anhydrous sodium sulfate. The organic phase was directly employed to reduced pressure to remove the solvent, and the resulting residue was purified by flash column chromatography to give pure product **10k** (99.0 mg, 58% yield) by using mixed methanol and dichloromethane (v:v = 1:30) as eluent.

White solid.  $R_f = 0.25$  (MeOH : DCM = 1:30).  $^1\text{H NMR}$  (400 MHz,  $\text{CDCl}_3$ ):  $\delta$  6.13 (s, 1H, ArH), 4.14 – 4.04 (m, 1H,  $\text{CH}_2$ ), 4.03 (s, 3H,  $\text{OCH}_3$ ), 3.97 (s, 3H,  $\text{OCH}_3$ ), 3.91 (tq,  $J = 7.9, 4.3, 3.8$  Hz, 1H,  $\text{CH}_2$ ), 3.77 (s, 3H,  $\text{OCH}_3$ ), 3.73 – 3.59 (m, 1H,  $\text{CH}_2$ ), 3.32 – 3.05 (m, 3H,  $\text{CH}_2$ ), 2.38 (dd,  $J = 14.5, 3.0$  Hz, 1H, CH), 2.15 (ddd,  $J = 13.8, 11.2, 2.0$  Hz, 1H,  $\text{CH}_2$ ), 1.94 – 1.78 (m, 2H,  $\text{CH}_2$ ), 1.57 – 1.38 (m, 2H,  $\text{CH}_2$ ), 1.16 (d,  $J = 6.8$  Hz, 3H,  $\text{CH}_3$ ).  $^{13}\text{C NMR}$  (100 MHz,  $\text{CDCl}_3$ ):  $\delta$  190.3 (C=O), 168.9 (C=ON), 165.8 (COO), 164.8 (ArO), 157.9 (ArO), 149.2 (ArO), 106.6 (Ar), 104.6 (Ar), 97.8 (Ar), 95.6 (Ar), 89.8 (C), 67.1 ( $\text{CH}_2$ ), 57.1 ( $\text{OCH}_3$ ), 56.4 ( $\text{OCH}_3$ ), 53.4 ( $\text{OCH}_3$ ), 43.0 ( $\text{CH}_2$ ), 39.1 (CH), 35.1 (CH), 34.7 ( $\text{CH}_2$ ), 33.9 ( $\text{CH}_2$ ), 14.4 ( $\text{CH}_3$ ). HRMS (ESI):  $m/z$  calcd for  $\text{C}_{21}\text{H}_{27}\text{NO}_8\text{Cl}$ : 456.1425; found: 456.1419  $[\text{M}+\text{H}]^+$ .

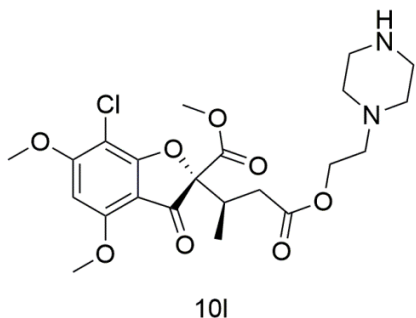

**methyl (R)-7-chloro-4,6-dimethoxy-3-oxo-2-((R)-4-oxo-4-(2-(piperazin-1-yl)ethoxy)butan-2-yl)-2,3-dihydrobenzofuran-2-carboxylate (10I)**

Compound **9** (142 mg, 0.38 mmol) was dissolved in anhydrous DCM (2 mL) in a 5 mL round-bottom flask. Subsequently, add 480 mg (1.9 mmol) of EDCI and 6 mg (0.05 mmol) of DMAP. After stirring for half an hour, add 260 mg (2 mmol) of 2-(piperazin-1-yl)ethan-1-ol. The resulting mixture was stirred at room temperature overnight. The reaction was monitored by TLC, the mixture was diluted with DCM (20 ml). Washed with water (20 ml x 2) and brine (10 ml x 1), dried with anhydrous sodium sulfate. The organic phase was directly employed to reduced pressure to remove the solvent, and the resulting residue was purified by flash column chromatography to give pure product **10I** (83.0 mg, 52% yield) by using mixed methanol and dichloromethane (v:v = 1:30) as eluent.

White solid.  $R_f = 0.25$  (MeOH : DCM = 1:30).  $^1\text{H NMR}$  (400 MHz,  $\text{CDCl}_3$ ):  $\delta$  6.13 (s, 1H, ArH), 4.03 (s, 3H,  $\text{OCH}_3$ ), 3.97 (s, 3H,  $\text{OCH}_3$ ), 3.77 (s, 3H,  $\text{OCH}_3$ ), 3.63 (t,  $J = 5.3$  Hz, 2H,  $\text{CH}_2$ ), 3.58 (dd,  $J = 6.5, 3.9$  Hz, 1H,  $\text{CH}_2$ ), 3.51 – 3.36 (m, 2H,  $\text{CH}_2$ ), 3.26 (q,  $J = 7.2$  Hz, 1H,  $\text{CH}_2$ ), 3.17 (dq,  $J = 13.6, 6.9, 3.0$  Hz, 1H, CH), 2.56 (t,  $J = 5.4$  Hz, 2H,  $\text{CH}_2$ ), 2.52 – 2.44 (m, 4H,  $\text{CH}_2$ ), 2.43 – 2.30 (m, 1H,  $\text{CH}_2$ ), 2.15 (dd,  $J = 14.4, 11.3$  Hz, 1H,  $\text{CH}_2$ ), 1.17 (d,  $J = 6.8$  Hz, 3H,  $\text{CH}_3$ ).  $^{13}\text{C NMR}$  (100 MHz,  $\text{CDCl}_3$ ):  $\delta$  190.3 (C=O), 168.9 (C=ON), 165.7 (COO), 164.8 (ArO), 157.9 (ArO), 149.7 (ArO), 104.6 (Ar), 97.8 (Ar), 95.5 (Ar), 89.8 (C), 59.3 ( $\text{OCH}_3$ ), 57.1 ( $\text{OCH}_3$ ), 56.4 ( $\text{OCH}_3$ ), 53.4 ( $\text{CH}_2$ ), 53.2

(CH<sub>2</sub>), 52.6 (CH<sub>2</sub>), 45.7 (CH<sub>2</sub>), 45.5 (CH<sub>2</sub>), 41.7 (CH<sub>2</sub>), 35.0 (CH), 33.7 (CH<sub>2</sub>), 14.3 (CH<sub>3</sub>). HRMS (ESI): *m/z* calcd for C<sub>22</sub>H<sub>30</sub>N<sub>2</sub>O<sub>8</sub>Cl: 485.1691; found: 485.1692 [M+H]<sup>+</sup>.

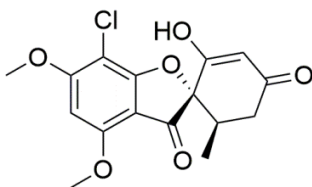

11

**(2*S*,6'*R*)-7-chloro-2'-hydroxy-4,6-dimethoxy-6'-methyl-3*H*-spiro[benzofuran-2,1'-cyclohexan]-2'-ene-3,4'-dione (11)**

Griseofulvin **1** (390 mg, 1.1 mmol) was dissolved in glacial acetic acid (4 mL) in a 25 mL round-bottom flask. Subsequently, add 2M H<sub>2</sub>SO<sub>4</sub> (1 ml). The resulting mixture was stirred at 80 °C for 45 min. The reaction was monitored by TLC, the mixture was returned to room temperature. The mixture was filtered, then washed with ice water, and then with ice ethyl acetate. The filter cake is dried to obtain a crude product **11** (369.0 mg, 99% yield), which can be directly used for the next step without any purification.

White solid. *R<sub>f</sub>* = 0.3 (EtOAc : petroleum ether = 1:2). <sup>1</sup>H NMR (400 MHz, DMSO-*d*<sub>6</sub>): δ 6.45 (s, 1H, ArH), 5.32 (s, 1H, C=CH), 4.03 (s, 3H, OCH<sub>3</sub>), 3.91 (s, 3H, OCH<sub>3</sub>), 2.91 – 2.66 (m, 2H, CH<sub>2</sub>), 2.46 (d, *J* = 2.9 Hz, 1H, CH), 0.85 (d, *J* = 6.1 Hz, 3H, CH<sub>3</sub>). HRMS (ESI): *m/z* calcd for C<sub>16</sub>H<sub>16</sub>O<sub>6</sub>Cl: 339.0635; found: 339.0633 [M+H]<sup>+</sup>.

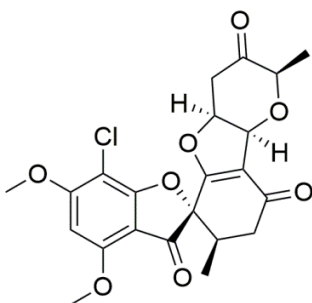

12a

**(2S,2'R,4a'S,7'R,9b'S)-7-chloro-4,6-dimethoxy-2',7'-dimethyl-4a',7',8',9b'-tetrahydro-2-H,3H,9'H-spiro[benzofuran-2,6'-pyrano[3,2-b]benzofuran]-3,3',9'(4'H)-trione (12a)**

Compound **11** (37 mg, 0.11 mmol) was dissolved in anhydrous DCM (1 mL) in a 5 mL round-bottom flask. Subsequently, add 12 mg (0.01 mmol) of Pd(PPh<sub>3</sub>)<sub>4</sub> and 10 mg (0.1 mmol) of triethylamine, then add 17 mg (0.1 mmol) of (2S,6R)-6-methyl-5-oxo-5,6-dihydro-2H-pyran-2-yl acetate. The resulting mixture was stirred at room temperature for 1 h. The reaction was monitored by TLC, the mixture was filtered, diluted with DCM (20 ml). Washed with water (20 ml x 2) and brine (10 ml x 1), dried with anhydrous sodium sulfate. The organic phase was directly employed to reduced pressure to remove the solvent, and the resulting residue was purified by flash column chromatography to give pure product **12a** (30.0 mg, 67% yield) by using mixed ethyl acetate and petroleum ether (v:v = 1:1) as eluent.

White solid. R<sub>f</sub> = 0.3 (EtOAc : petroleum ether = 1:1). <sup>1</sup>H NMR (400 MHz, CDCl<sub>3</sub>): δ 6.10 (s, 1H, ArH), 5.48 (d, *J* = 7.6 Hz, 1H, CH), 5.32 – 5.26 (m, 1H, CH), 4.03 (s, 3H, OCH<sub>3</sub>), 4.01 – 3.97 (m, 1H, CH), 3.92 (s, 3H, OCH<sub>3</sub>), 3.16 (dd, *J* = 17.9, 11.7 Hz, 1H, CH<sub>2</sub>), 2.99 (td, *J* = 17.6, 17.1, 3.2 Hz, 2H, CH<sub>2</sub>), 2.93 – 2.86 (m, 1H, CH<sub>2</sub>), 2.55 (ddd, *J* = 17.9, 5.6, 1.4 Hz, 1H, CH), 1.25 (d, *J* = 6.8 Hz, 3H, CH<sub>3</sub>), 1.04 (d, *J* = 6.7 Hz, 3H, CH<sub>3</sub>). <sup>13</sup>C NMR (100 MHz, CDCl<sub>3</sub>): δ 208.8 (C=O), 191.7 (C=O), 184.3 (C=O), 181.2 (ArO), 169.8 (ArO), 164.6 (C=C), 157.8 (ArO), 110.1 (C=C), 104.8 (Ar), 97.3 (Ar), 95.3 (Ar), 89.6 (C), 84.0 (CH), 73.3 (CH), 73.2 (CH), 57.1 (OCH<sub>3</sub>), 56.3 (OCH<sub>3</sub>), 38.4 (CH<sub>2</sub>), 36.1 (CH<sub>2</sub>), 28.0 (CH), 15.9 (CH<sub>3</sub>), 14.9 (CH<sub>3</sub>). HRMS (ESI): *m/z* calcd for C<sub>22</sub>H<sub>22</sub>O<sub>8</sub>Cl: 449.1003; found: 449.0999 [M+H]<sup>+</sup>.



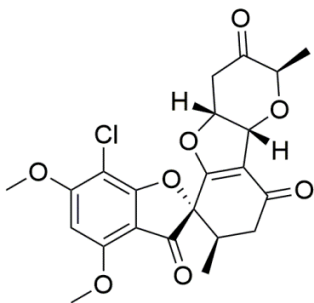

12b

**(2*S*,2'*R*,4*a*'*R*,7'*R*,9*b*'*R*)-7-chloro-4,6-dimethoxy-2',7'-dimethyl-4*a*',7',8',9*b*'-tetrahydro-2'-*H*,3*H*,9'*H*-spiro[benzofuran-2,6'-pyrano[3,2-*b*]benzofuran]-3,3',9'(4'*H*)-trione (12b)**

Compound **11** (37 mg, 0.11 mmol) was dissolved in anhydrous DCM (1 mL) in a 5 mL round-bottom flask. Subsequently, add 12 mg (0.01 mmol) of Pd(PPh<sub>3</sub>)<sub>4</sub> and 10 mg (0.1 mmol) of triethylamine, then add 17 mg (0.1 mmol) of (2*R*,6*R*)-6-methyl-5-oxo-5,6-dihydro-2*H*-pyran-2-yl acetate. The resulting mixture was stirred at room temperature for 1 h. The reaction was monitored by TLC, the mixture was filtered, diluted with DCM (20 ml). Washed with water (20 ml x 2) and brine (10 ml x 1), dried with anhydrous sodium sulfate. The organic phase was directly employed to reduced pressure to remove the solvent, and the resulting residue was purified by flash column chromatography to give pure product **12b** (29.0 mg, 65% yield) by using mixed ethyl acetate and petroleum ether (v:v = 1:1) as eluent.

White solid.  $R_f = 0.3$  (EtOAc : petroleum ether = 1:1). <sup>1</sup>H NMR (400 MHz, CDCl<sub>3</sub>):  $\delta$  6.09 (s, 1H, ArH), 5.02 (m, 1H, CH), 4.87 (d,  $J = 6.3$  Hz, 1H, CH), 4.02 (s, 3H, OCH<sub>3</sub>), 3.96 (m, 1H, CH), 3.92 (s, 3H, OCH<sub>3</sub>), 3.24 – 2.83 (m, 4H, CH<sub>2</sub>), 2.66 (dd,  $J = 17.6, 5.2$  Hz, 1H, CH), 1.35 (d,  $J = 7.0$  Hz, 3H, CH<sub>3</sub>), 1.06 (d,  $J = 6.5$  Hz, 3H, CH<sub>3</sub>). <sup>13</sup>C NMR (100 MHz, CDCl<sub>3</sub>):  $\delta$  210.1 (C=O), 192.2 (C=O), 183.8 (C=O), 181.4 (ArO), 170.1 (ArO), 164.7 (C=C), 157.7 (ArO), 112.2 (C=C), 105.1 (Ar), 97.5 (Ar), 95.5 (Ar), 89.5 (C), 84.0 (CH), 79.1 (CH), 75.6 (CH), 57.0 (OCH<sub>3</sub>), 56.3 (OCH<sub>3</sub>), 39.6 (CH<sub>2</sub>), 35.6 (CH<sub>2</sub>),

28.3 (CH), 16.8 (CH<sub>3</sub>), 14.7 (CH<sub>3</sub>). HRMS (ESI): *m/z* calcd for C<sub>22</sub>H<sub>22</sub>O<sub>8</sub>Cl: 449.1003; found: 449.0995 [M+H]<sup>+</sup>.

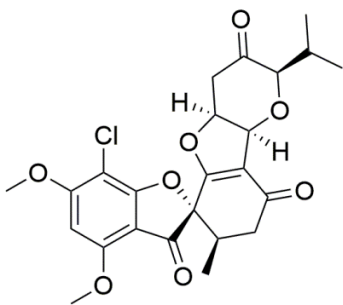

12c

**(2*S*,2'*R*,4*a*'*S*,7'*R*,9*b*'*S*)-7-chloro-2'-isopropyl-4,6-dimethoxy-7'-methyl-4*a*',7',8',9*b*'-tetrahydro-2'*H*,3*H*,9'*H*-spiro[benzofuran-2,6'-pyrano[3,2-*b*]benzofuran]-3,3',9'(4'*H*)-trione (12c)**

Compound **11** (37 mg, 0.11 mmol) was dissolved in anhydrous DCM (1 mL) in a 5 mL round-bottom flask. Subsequently, add 12 mg (0.01 mmol) of Pd(PPh<sub>3</sub>)<sub>4</sub> and 10 mg (0.1 mmol) of triethylamine, then add 20 mg (0.1 mmol) of (2*S*,6*R*)-6-isopropyl-5-oxo-5,6-dihydro-2*H*-pyran-2-yl acetate. The resulting mixture was stirred at room temperature for 1 h. The reaction was monitored by TLC, the mixture was filtered, diluted with DCM (20 mL). Washed with water (20 mL x 2) and brine (10 mL x 1), dried with anhydrous sodium sulfate. The organic phase was directly employed to reduced pressure to remove the solvent, and the resulting residue was purified by flash column chromatography to give pure product **12c** (34.0 mg, 72% yield) by using mixed ethyl acetate and petroleum ether (v:v = 1:1) as eluent.

White solid. *R<sub>f</sub>* = 0.3 (EtOAc : petroleum ether = 1:1). <sup>1</sup>H NMR (400 MHz, CDCl<sub>3</sub>): δ 6.10 (s, 1H, ArH), 5.04 – 4.89 (m, 1H, CH), 4.79 (d, *J* = 6.3 Hz, 1H, CH), 4.02 (s, 3H, OCH<sub>3</sub>), 3.92 (s, 3H, OCH<sub>3</sub>), 3.64 (d, *J* = 3.7 Hz, 1H, CH), 3.18 – 2.99 (m, 3H, CH, CH<sub>2</sub>), 2.92 (dd, *J* = 13.7, 8.9 Hz, 1H, CH<sub>2</sub>), 2.67 (dd, *J* = 17.0, 4.6 Hz, 1H, CH<sub>2</sub>), 2.17 (ddp, *J* = 10.6, 6.9, 3.5 Hz, 1H, CH), 1.07 (d, *J* = 6.4 Hz, 3H, CH<sub>3</sub>), 1.02 (d, *J* = 6.9 Hz, 3H, CH<sub>3</sub>), 0.91 (d, *J* = 6.9 Hz, 3H, CH<sub>3</sub>). <sup>13</sup>C NMR (100 MHz, CDCl<sub>3</sub>): δ 210.6 (C=O), 192.2

(C=O), 183.5 (C=O), 181.2 (ArO), 170.0 (ArO), 164.6 (C=C), 157.7 (ArO), 112.2 (C=C), 105.1 (Ar), 97.5 (Ar), 95.7 (Ar), 89.5 (C), 86.9 (CH), 84.3 (CH), 75.6 (CH), 57.0 (OCH<sub>3</sub>), 56.3 (OCH<sub>3</sub>), 41.9 (CH<sub>2</sub>), 35.6 (CH<sub>2</sub>), 31.3 (CH), 28.3 (CH), 18.6 (CH<sub>3</sub>), 16.8 (CH<sub>3</sub>), 14.7 (CH<sub>3</sub>). HRMS (ESI): *m/z* calcd for C<sub>24</sub>H<sub>26</sub>O<sub>8</sub>Cl: 477.1316; found: 477.1308 [M+H]<sup>+</sup>.

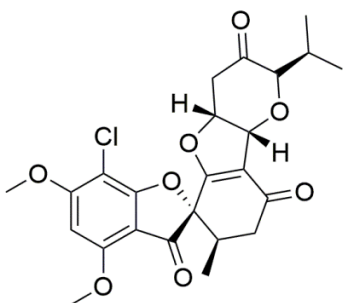

12d

**(2*S*,2'*R*,4*a*'*R*,7'*R*,9*b*'*R*)-7-chloro-2'-isopropyl-4,6-dimethoxy-7'-methyl-4*a*',7',8',9*b*'-tetrahydro-2'*H*,3*H*,9'*H*-spiro[benzofuran-2,6'-pyrano[3,2-*b*]benzofuran]-3,3',9'(4'*H*)-trione (12d)**

Compound **11** (37 mg, 0.11 mmol) was dissolved in anhydrous DCM (1 mL) in a 5 mL round-bottom flask. Subsequently, add 12 mg (0.01 mmol) of Pd(PPh<sub>3</sub>)<sub>4</sub> and 10 mg (0.1 mmol) of triethylamine, then add 20 mg (0.1 mmol) of (2*R*,6*R*)-6-isopropyl-5-oxo-5,6-dihydro-2*H*-pyran-2-yl acetate. The resulting mixture was stirred at room temperature for 1 h. The reaction was monitored by TLC, the mixture was filtered, diluted with DCM (20 ml). Washed with water (20 ml x 2) and brine (10 ml x 1), dried with anhydrous sodium sulfate. The organic phase was directly employed to reduced pressure to remove the solvent, and the resulting residue was purified by flash column chromatography to give pure product **12d** (37.0 mg, 78% yield) by using mixed ethyl acetate and petroleum ether (*v:v* = 1:1) as eluent.

White solid. *R<sub>f</sub>* = 0.3 (EtOAc : petroleum ether = 1:1). <sup>1</sup>H NMR (400 MHz, CDCl<sub>3</sub>): δ 6.11 (s, 1H, ArH), 5.54 (d, *J* = 7.7 Hz, 1H, CH), 5.36 – 5.24 (m, 1H, CH), 4.01 (s, 3H, OCH<sub>3</sub>), 3.92 (s, 3H, OCH<sub>3</sub>), 3.75 (d, *J* = 2.7 Hz, 1H, CH), 3.14 (dd, *J* = 17.9, 11.7 Hz, 1H,

CH<sub>2</sub>), 2.99 – 2.79 (m, 3H, CH<sub>2</sub>, CH), 2.55 (dd, *J* = 18.0, 5.7 Hz, 1H, CH<sub>2</sub>), 2.41 – 2.21 (m, 1H, CH), 1.03 (d, *J* = 6.7 Hz, 3H, CH<sub>3</sub>), 0.79 (d, *J* = 6.9 Hz, 6H, CH<sub>3</sub>). <sup>13</sup>C NMR (100 MHz, CDCl<sub>3</sub>): δ 208.8 (C=O), 191.7 (C=O), 184.1 (C=O), 181.2 (ArO), 169.8 (ArO), 164.6 (C=C), 157.9 (ArO), 109.9 (C=C), 104.8 (Ar), 97.3 (Ar), 95.4 (Ar), 89.8 (C), 84.13 (CH), 80.63 (CH), 73.13 (CH), 57.1 (OCH<sub>3</sub>), 56.3 (OCH<sub>3</sub>), 40.1 (CH<sub>2</sub>), 35.8 (CH<sub>2</sub>), 29.1 (CH), 28.0 (CH), 18.6 (CH<sub>3</sub>), 15.9 (CH<sub>3</sub>), 14.9 (CH<sub>3</sub>). HRMS (ESI): *m/z* calcd for C<sub>24</sub>H<sub>26</sub>O<sub>8</sub>Cl: 477.1316; found: 477.1314 [M+H]<sup>+</sup>.

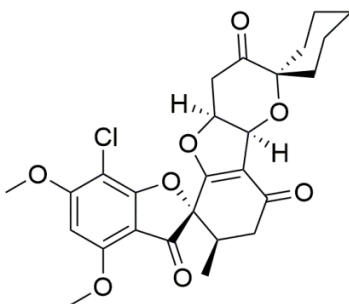

12e

**(2*S*,4*a'**S*,7'*R*,9*b'**S*)-7-chloro-4,6-dimethoxy-7'-methyl-4*a'*,7',8',9*b'*-tetrahydro-3*H*,9'*H*-dispiro[benzofuran-2,6'-pyrano[3,2-*b*]benzofuran-2',1''-cyclohexane]-3,3',9'(4'*H*)-trione (12e)**

Compound **11** (37 mg, 0.11 mmol) was dissolved in anhydrous DCM (1 mL) in a 5 mL round-bottom flask. Subsequently, add 12 mg (0.01 mmol) of Pd(PPh<sub>3</sub>)<sub>4</sub> and 10 mg (0.1 mmol) of triethylamine, then add 22 mg (0.1 mmol) of (S)-5-oxo-1-oxaspiro[5.5]undec-3-en-2-yl acetate. The resulting mixture was stirred at room temperature for 1 h. The reaction was monitored by TLC, the mixture was filtered, diluted with DCM (20 ml). Washed with water (20 ml x 2) and brine (10 ml x 1), dried with anhydrous sodium sulfate. The organic phase was directly employed to reduced pressure to remove the solvent, and the resulting residue was purified by flash column chromatography to give pure product **12e** (31.0 mg, 61% yield) by using mixed ethyl acetate and petroleum ether (v:v = 1:1) as eluent.

White solid.  $R_f = 0.3$  (EtOAc : petroleum ether = 1:1).  $^1\text{H NMR}$  (400 MHz,  $\text{CDCl}_3$ ):  $\delta$  6.10 (s, 1H, ArH), 5.28 – 4.90 (m, 2H, CH), 4.01 (s, 3H,  $\text{OCH}_3$ ), 3.93 (s, 3H,  $\text{OCH}_3$ ), 3.17 – 2.81 (m, 4H, CH,  $\text{CH}_2$ ), 2.72 – 2.48 (m, 1H, CH), 1.72 – 1.41 (m, 10H,  $\text{CH}_2$ ), 1.08 (dd,  $J = 6.5, 1.9$  Hz, 3H,  $\text{CH}_3$ ).  $^{13}\text{C NMR}$  (100 MHz,  $\text{CDCl}_3$ ):  $\delta$  212.2 (C=O), 192.1 (C=O), 183.7 (C=O), 180.9 (ArO), 170.0 (ArO), 164.6 (C=C), 157.8 (ArO), 132.1 (C), 128.5 (Ar), 112.2 (C=C), 105.1 (Ar), 95.8 (Ar), 89.5 (C), 85.1 (CH), 82.7 (CH), 69.7 (CH), 57.0 ( $\text{OCH}_3$ ), 56.3 ( $\text{OCH}_3$ ), 39.8 ( $\text{CH}_2$ ), 35.4 ( $\text{CH}_2$ ), 33.7 ( $\text{CH}_2$ ), 28.4 ( $\text{CH}_2$ ), 27.4 ( $\text{CH}_2$ ), 25.1 ( $\text{CH}_2$ ), 20.6 ( $\text{CH}_2$ ), 20.0 (CH), 14.8 ( $\text{CH}_3$ ). HRMS (ESI):  $m/z$  calcd for  $\text{C}_{26}\text{H}_{28}\text{O}_8\text{Cl}$ : 503.1473; found: 503.1469  $[\text{M}+\text{H}]^+$ .

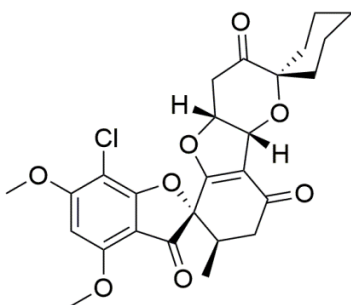

12f

**(2S,4a'R,7'R,9b'R)-7-chloro-4,6-dimethoxy-7'-methyl-4a',7',8',9b'-tetrahydro-3H,9'H-dispiro[benzofuran-2,6'-pyrano[3,2-b]benzofuran-2',1''-cyclohexane]-3,3',9'(4'H)-trione (12f)**

Compound **11** (37 mg, 0.11 mmol) was dissolved in anhydrous DCM (1 mL) in a 5 mL round-bottom flask. Subsequently, add 12 mg (0.01 mmol) of  $\text{Pd}(\text{PPh}_3)_4$  and 10 mg (0.1 mmol) of triethylamine, then add 22 mg (0.1 mmol) of (R)-5-oxo-1-oxaspiro[5.5]undec-3-en-2-yl acetate. The resulting mixture was stirred at room temperature for 1 h. The reaction was monitored by TLC, the mixture was filtered, diluted with DCM (20 mL). Washed with water (20 mL x 2) and brine (10 mL x 1), dried with anhydrous sodium sulfate. The organic phase was directly employed to reduced pressure to remove the solvent, and the resulting residue was purified by flash column

chromatography to give pure product **12f** (33.0 mg, 67% yield) by using mixed ethyl acetate and petroleum ether (v:v = 1:1) as eluent.

White solid.  $R_f = 0.3$  (EtOAc : petroleum ether = 1:1).  $^1\text{H NMR}$  (400 MHz,  $\text{CDCl}_3$ ):  $\delta$  6.10 (s, 1H, ArH), 5.28 – 4.90 (m, 2H, CH), 4.01 (s, 3H,  $\text{OCH}_3$ ), 3.93 (s, 3H,  $\text{OCH}_3$ ), 3.17 – 2.81 (m, 4H, CH,  $\text{CH}_2$ ), 2.72 – 2.48 (m, 1H, CH), 1.72 – 1.41 (m, 10H,  $\text{CH}_2$ ), 1.08 (dd,  $J = 6.5, 1.9$  Hz, 3H,  $\text{CH}_3$ ).  $^{13}\text{C NMR}$  (100 MHz,  $\text{CDCl}_3$ ):  $\delta$  212.2 (C=O), 192.1 (C=O), 183.7 (C=O), 180.9 (ArO), 170.0 (ArO), 164.6 (C=C), 157.8 (ArO), 132.1 (C), 128.5 (Ar), 112.2 (C=C), 105.1 (Ar), 95.8 (Ar), 89.5 (C), 85.1 (CH), 82.7 (CH), 69.7 (CH), 57.0 ( $\text{OCH}_3$ ), 56.3 ( $\text{OCH}_3$ ), 39.8 ( $\text{CH}_2$ ), 35.4 ( $\text{CH}_2$ ), 33.7 ( $\text{CH}_2$ ), 28.4 ( $\text{CH}_2$ ), 27.4 ( $\text{CH}_2$ ), 25.1 ( $\text{CH}_2$ ), 20.6 ( $\text{CH}_2$ ), 20.0 (CH), 14.8 ( $\text{CH}_3$ ). HRMS (ESI):  $m/z$  calcd for  $\text{C}_{26}\text{H}_{28}\text{O}_8\text{Cl}$ : 503.1473; found: 503.1474  $[\text{M}+\text{H}]^+$ .

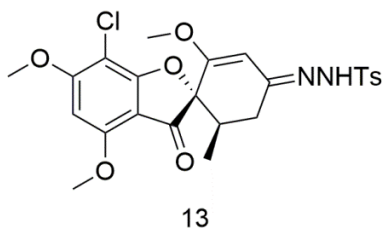

**N'-((2S,6'R,Z)-7-chloro-2',4,6-trimethoxy-6'-methyl-3-oxo-3H-spiro[benzofuran-2,1'-cyclohexan]-2'-en-4'-ylidene)-4-methylbenzenesulfonylhydrazide (13)**

Griseofulvin **1** (353 mg, 1 mmol) was dissolved in glacial acetic acid (4 mL) in a 25 mL round-bottom flask. Subsequently, add 372 mg (2 mmol) of *p*-toluenesulfonyl hydrazide. The resulting mixture was stirred at room temperature overnight. The reaction was monitored by TLC, the mixture was quenched with saturated ammonium chloride. The aqueous phase was extracted with ethyl acetate (10 ml x 3), the organic phases were combined, and then washed with water (20 ml x 2) and brine (10 ml x 1), dried with anhydrous sodium sulfate. The organic phase was directly employed to reduced pressure to remove the solvent, and the resulting residue was purified by flash column chromatography to give pure product **13** (505.5 mg, 97% yield) by using mixed ethyl acetate and petroleum ether (v:v = 1:1) as eluent.

White solid.  $R_f = 0.1$  (EtOAc : petroleum ether = 1:1).  $^1\text{H}$  NMR (400 MHz,  $\text{CDCl}_3$ ):  $\delta$  7.85 (d,  $J = 8.1$  Hz, 2H, ArH), 7.31 (dd,  $J = 8.2, 2.6$  Hz, 2H, ArH), 6.10 (s, 1H, ArH), 5.62 (s, 1H, C=CH), 4.00 (s, 3H,  $\text{OCH}_3$ ), 3.93 (s, 3H,  $\text{OCH}_3$ ), 3.51 (s, 3H,  $\text{OCH}_3$ ), 2.66 – 2.58 (m, 1H,  $\text{CH}_2$ ), 2.58 – 2.49 (m, 1H,  $\text{CH}_2$ ), 2.46 – 2.40 (m, 4H,  $\text{CH}_3$ , CH), 0.87 (t,  $J = 6.6$  Hz, 3H,  $\text{CH}_3$ ).  $^{13}\text{C}$  NMR (100 MHz,  $\text{CDCl}_3$ ):  $\delta$  193.9 (C=O), 169.5 (C=N), 164.6 (C=C), 159.7 (ArO), 157.6 (ArO), 154.3 (ArO), 144.0 (Ar), 135.5 (Ar), 129.9 (Ar), 129.7 (Ar), 128.3 (Ar), 128.0 (Ar), 105.4 (C=C), 102.1 (Ar), 93.2 (Ar), 90.9 (Ar), 89.3 (C), 57.0 ( $\text{OCH}_3$ ), 56.3 ( $\text{OCH}_3$ ), 56.1 ( $\text{OCH}_3$ ), 35.2 (CH), 27.7 ( $\text{CH}_2$ ), 21.6 ( $\text{CH}_3$ ), 14.2 ( $\text{CH}_3$ ). HRMS (ESI):  $m/z$  calcd for  $\text{C}_{24}\text{H}_{26}\text{N}_2\text{O}_7\text{SCl}$ : 521.1149; found: 521.1148 [ $\text{M}+\text{H}$ ] $^+$ .

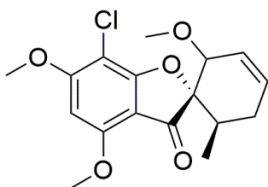

14

**(2S,6'R)-7-chloro-2',4,6-trimethoxy-6'-methyl-3H-spiro[benzofuran-2,1'-cyclohexan]-3'-en-3-one (14)**

Compound **13** (520 mg, 1 mmol) was dissolved in anhydrous  $\text{CHCl}_3$  (10 mL) in a 25 mL round-bottom flask under nitrogen atmosphere. Subsequently, cool to  $0^\circ\text{C}$  in an ice bath, Then add 1 ml of catechol borane in THF solution (1M), then the mixture was stirred at  $0^\circ\text{C}$  for 2 h. After returning to room temperature, add 409 mg (3 mmol) of Sodium acetate trihydrate. The resulting mixture was refluxed and reacted overnight. The reaction was monitored by TLC, remove most of the solvent in the mixture. The aqueous phase was extracted with ethyl acetate (10 ml x 3), the organic phases were combined, and then washed with water (20 ml x 2) and brine (10 ml x 1), dried with anhydrous sodium sulfate. The organic phase was directly employed to reduced pressure to remove the solvent, and the resulting residue was purified by flash column chromatography to give pure product **14** (327.9 mg, 97% yield) by using mixed ethyl acetate and petroleum ether (v:v = 1:2) as eluent.

White solid.  $R_f = 0.3$  (EtOAc : petroleum ether = 1:2).  $^1\text{H}$  NMR (400 MHz,  $\text{CDCl}_3$ ):  $\delta$  6.08 (s, 1H, ArH), 5.94 (d,  $J = 10.2$  Hz, 1H, =CH), 5.89 – 5.76 (m, 1H, =CH), 4.06 (s, 1H, CH), 4.00 (s, 3H,  $\text{OCH}_3$ ), 3.97 (s, 3H,  $\text{OCH}_3$ ), 3.40 (s, 3H,  $\text{OCH}_3$ ), 2.64 – 2.51 (m, 1H, CH), 2.35 – 2.18 (m, 1H,  $\text{CH}_2$ ), 2.12 – 1.94 (m, 1H,  $\text{CH}_2$ ), 1.09 (d,  $J = 7.1$  Hz, 3H,  $\text{CH}_3$ ).  $^{13}\text{C}$  NMR (100 MHz,  $\text{CDCl}_3$ ):  $\delta$  196.6 (C=O), 168.3 (ArO), 163.9 (ArO), 157.5 (ArO), 129.3 (Ar), 123.1 (Ar), 105.9 (Ar), 97.5 (C=C), 93.8 (C=C), 88.9 (C), 75.1 (CH), 58.8 (CH), 56.8 ( $\text{OCH}_3$ ), 56.3 ( $\text{OCH}_3$ ), 33.1 ( $\text{OCH}_3$ ), 31.0 ( $\text{CH}_2$ ), 13.8 ( $\text{CH}_3$ ). HRMS (ESI):  $m/z$  calcd for  $\text{C}_{17}\text{H}_{20}\text{O}_5\text{Cl}$ : 339.0999; found: 339.0999  $[\text{M}+\text{H}]^+$ .

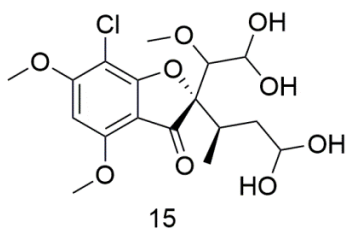

**(2S)-7-chloro-2-(2,2-dihydroxy-1-methoxyethyl)-2-((R)-4,4-dihydroxybutan-2-yl)-4,6-dimethoxybenzofuran-3(2H)-one (15)**

Compound **14** (338 mg, 1 mmol) was dissolved in mixed acetonitrile and water (v:v = 6:1) (7 mL) in a 25 mL round-bottom flask. Subsequently, add 32 mg (1.5 mmol) of sodium periodate and 7 mg (0.03 mmol) of ruthenium trichloride. The resulting mixture was stirred at room temperature overnight. The reaction was monitored by TLC, the mixture was quenched with saturated sodium thiosulfate. The aqueous phase was extracted with ethyl acetate (10 ml x 3), the organic phases were combined, and then washed with water (20 ml x 2) and brine (10 ml x 1), dried with anhydrous sodium sulfate. The organic phase was directly employed to reduced pressure to remove the solvent, and the resulting residue was purified by flash column chromatography to give pure product **15** (316.0 mg, 78% yield) by using mixed ethyl acetate and petroleum ether (v:v = 2:1) as eluent.

White solid.  $R_f = 0.1$  (EtOAc : petroleum ether = 2:1).  $^1\text{H}$  NMR (400 MHz,  $\text{DMSO}-d_6$ ):  $\delta$  8.29 (d,  $J = 2.0$  Hz, 1H, CHO), 6.37 (s, 1H, ArH), 5.00 (d,  $J = 6.0$  Hz, 1H,



OH), 4.64 (s, 1H, OH), 4.05 – 3.95 (m, 1H, CH), 3.98 (s, 3H, OCH<sub>3</sub>), 3.91 (s, 3H, OCH<sub>3</sub>), 3.79 (d, *J* = 6.2 Hz, 2H, CH), 3.28 (s, 3H, OCH<sub>3</sub>), 1.96 – 1.76 (m, 2H, CH<sub>2</sub>, CH), 1.67 (d, *J* = 14.7 Hz, 1H, CH<sub>2</sub>), 1.18 (d, *J* = 7.2 Hz, 3H, CH<sub>3</sub>). <sup>13</sup>C NMR (100 MHz, DMSO-*d*<sub>6</sub>): δ 195.3 (C=O), 167.7 (ArO), 163.9 (ArO), 157.6 (ArO), 105.5 (Ar), 96.7 (Ar), 95.8 (Ar), 90.7 (C), 79.6 (CH), 78.2 (CH), 73.1 (CH), 70.5 (CH), 61.3 (OCH<sub>3</sub>), 57.7 (OCH<sub>3</sub>), 56.7 (OCH<sub>3</sub>), 35.8 (CH), 34.3 (CH<sub>2</sub>), 16.7 (CH<sub>3</sub>). HRMS (ESI): *m/z* calcd for C<sub>17</sub>H<sub>24</sub>O<sub>9</sub>Cl: 407.1109; found: 407.1116 [M+H]<sup>+</sup>.

## NMR spectra of all products

20191205FO0009ZL-GR-2B.1.fid

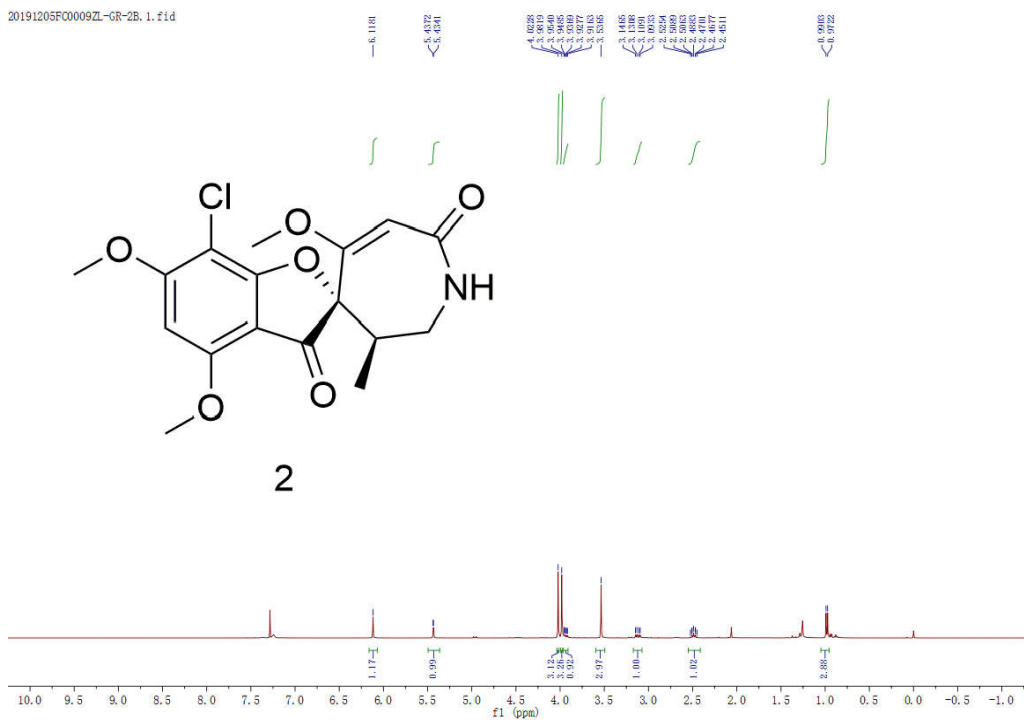

## <sup>1</sup>H NMR spectrum of 2 (400 MHz, CDCl<sub>3</sub>)

20200620D1-2L-GR-2B.1.fid

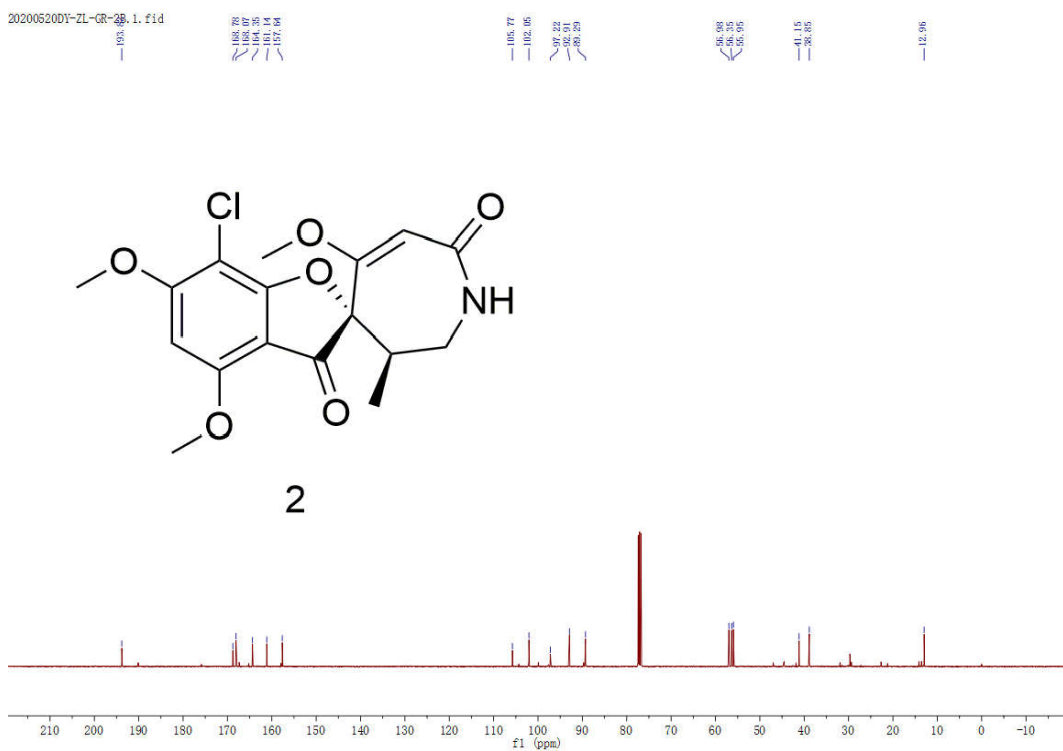

## <sup>13</sup>C NMR spectrum of 2 (100 MHz, CDCl<sub>3</sub>)



DV20200716-NMR-01ZL-GR-2B1.1.f1d  
 168.20  
 173.26  
 168.49  
 168.21  
 168.41  
 157.88

101.43  
 97.17  
 97.17  
 80.47

57.00  
 56.42  
 56.40

43.20  
 40.61

26.99

13.49

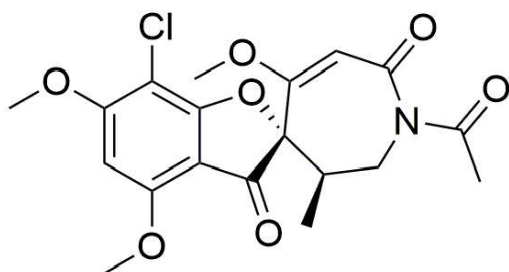

3a

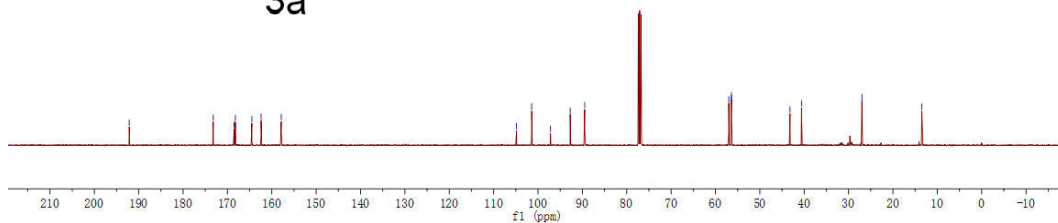

<sup>13</sup>C NMR spectrum of 3a (100 MHz, CDCl<sub>3</sub>)

DV20200715-NMR-01ZL-GR-2B2.1.f1d

7.3592  
 7.3445  
 7.3370  
 7.3140  
 7.2801

6.0826

5.8880

5.1244

5.0870

4.3340

4.2840

4.2540

4.2240

4.1940

3.9990

3.2826

3.2538

2.9795

2.9590

2.9411

2.3434

2.3231

2.2825

2.2705

0.7144

0.6962

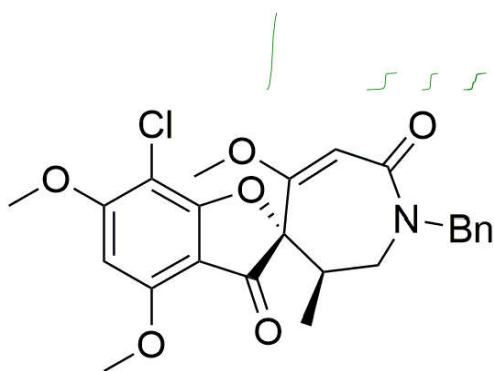

3b

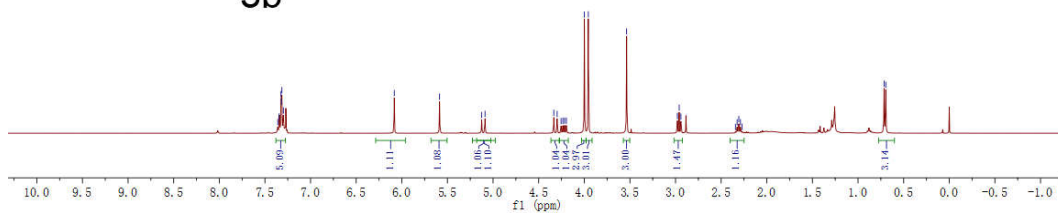

<sup>1</sup>H NMR spectrum of 3b (400 MHz, CDCl<sub>3</sub>)

DV20200716-NMR-01ZL-CR-2B2. 1. f1d

194  
168.92  
164.39  
163.95  
157.56

137.30  
126.22  
127.00

105.86  
102.89  
97.18  
92.52  
86.22

56.52  
55.81  
51.94  
47.06

39.08

13.41

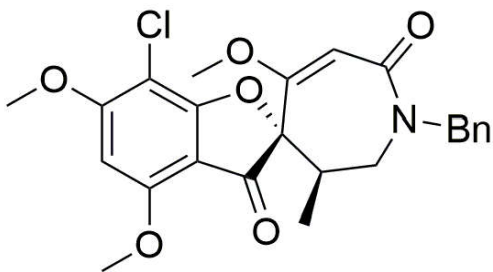

3b

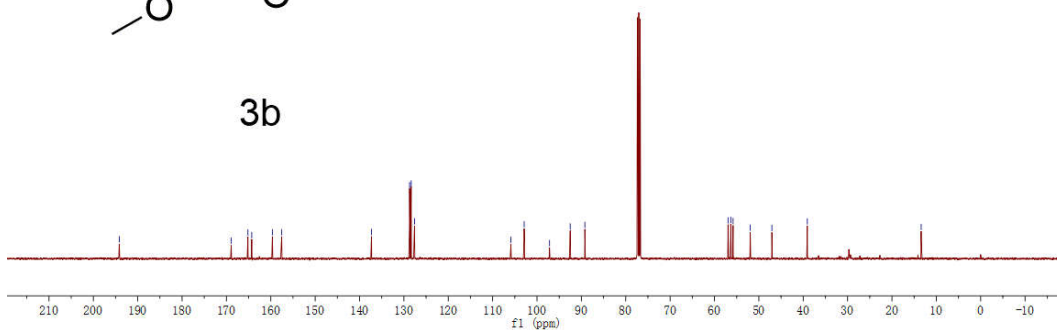

<sup>13</sup>C NMR spectrum of 3b (100 MHz, CDCl<sub>3</sub>)

DV20200717-NMR-01ZL-CR-2B3. 1. f1d

7.4182  
7.3763  
7.2938

6.1174

5.6206

4.6285  
4.6171  
4.5985  
4.5785

3.8837

3.5786  
3.5659  
3.4873

2.7005  
2.6824  
2.7538  
2.7356  
2.7171

1.0216  
1.0094

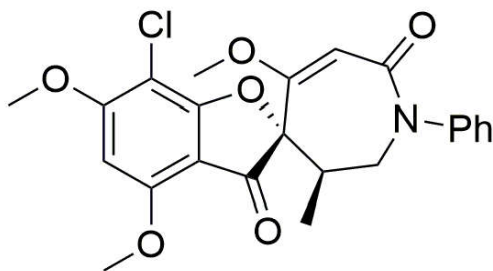

3c

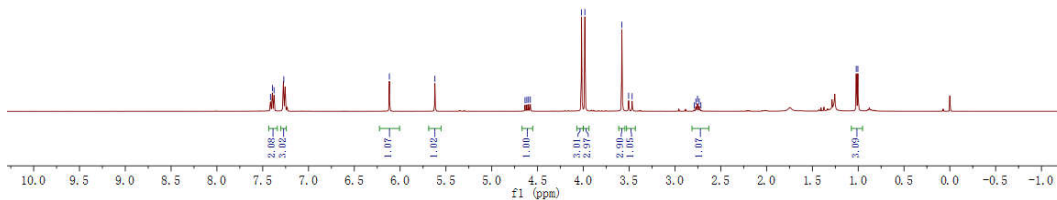

<sup>1</sup>H NMR spectrum of 3c (400 MHz, CDCl<sub>3</sub>)

DV20200718-NMR-03GR-2B3.1.fid

194  
168.95  
164.91  
160.02  
157.85

144.31

129.25  
126.26

105.82  
103.24

97.29

92.81

89.32

56.59  
55.95  
51.53

39.70

13.58

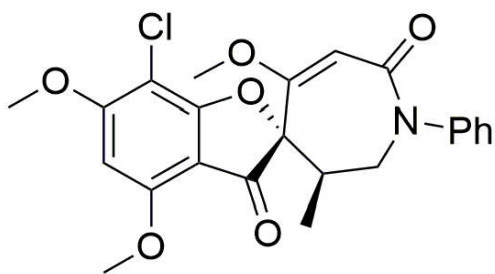

3c

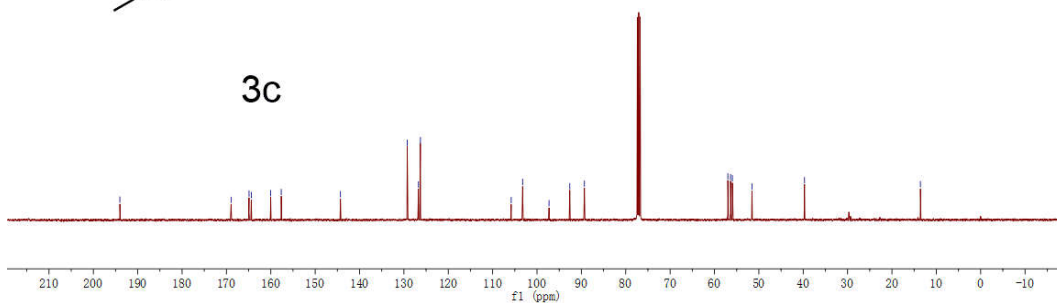

<sup>13</sup>C NMR spectrum of 3c (100 MHz, CDCl<sub>3</sub>)

DV20200807-NMR-02ZLGR-B4.1.fid

6.1107

5.4443

4.1149

4.1256

4.0142

3.2937

3.6289

3.0859

3.0127

3.0246

3.0365

2.9942

2.9810

2.9678

2.9546

2.9414

1.1943

1.1762

1.0180

1.0001

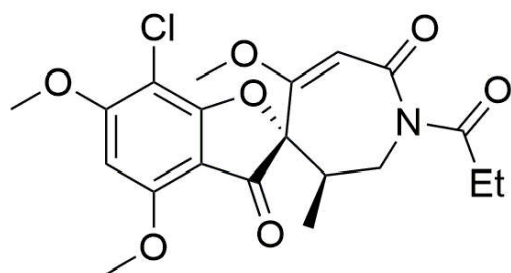

3d

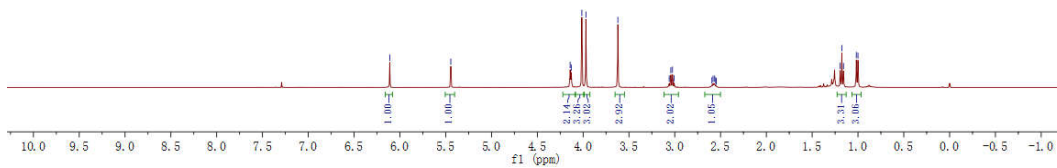

<sup>1</sup>H NMR spectrum of 3d (400 MHz, CDCl<sub>3</sub>)

DY20200807-NMR-04ZLGR-B4. 1. f1d

168.46  
177.48  
168.46  
168.46  
162.16  
157.94

104.90  
101.36  
97.13  
92.69  
86.44

57.00  
56.39  
56.36

43.47  
40.51  
32.22

13.41  
9.28

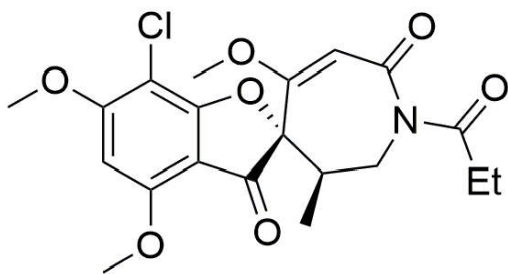

3d

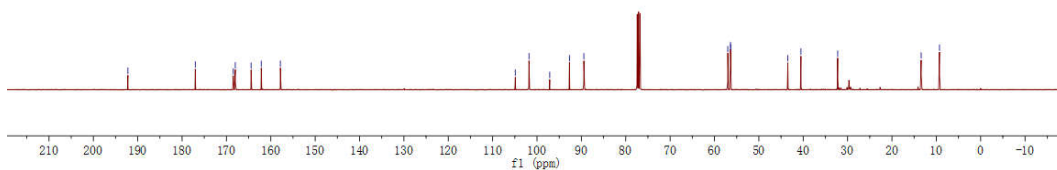

**<sup>13</sup>C NMR spectrum of 3d (100 MHz, CDCl<sub>3</sub>)**

DY20200807-NMR-02ZLGR-B5. 1. f1d

6.1095

5.4596

4.1397  
4.1043  
3.9935

3.8193

3.0018  
2.9724  
2.9447  
2.9170  
2.8925  
2.8670  
2.8431  
2.8190  
2.7946  
1.8990  
1.8750  
1.8531  
1.0146  
0.9969  
0.9802  
0.9632

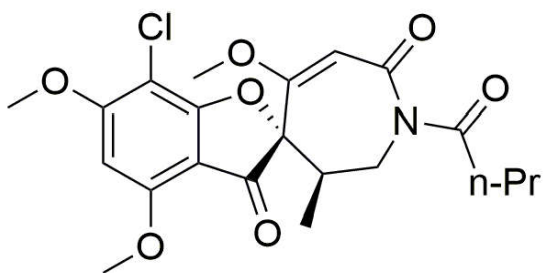

3e

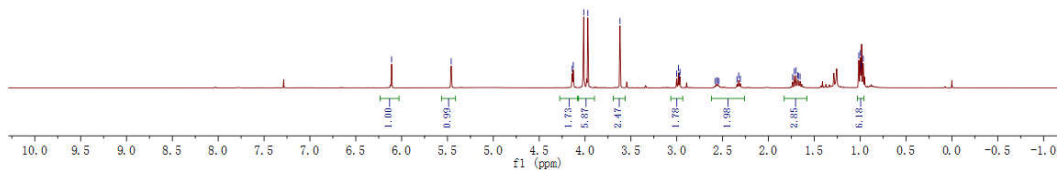

**<sup>1</sup>H NMR spectrum of 3e (400 MHz, CDCl<sub>3</sub>)**

DY20200807-NMR-04ZLGR-B5.1.fid

198.96  
176.86  
168.90  
167.99  
164.25  
157.86

104.30  
101.32  
97.14  
92.70  
89.44

57.09  
56.39  
56.37

43.59  
40.84  
40.44

18.40  
13.82

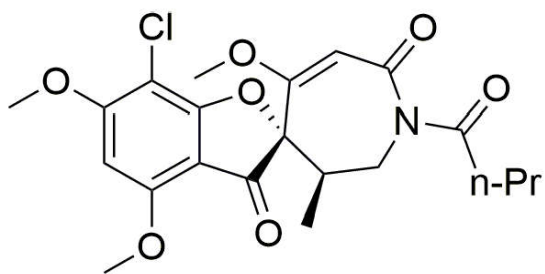

3e

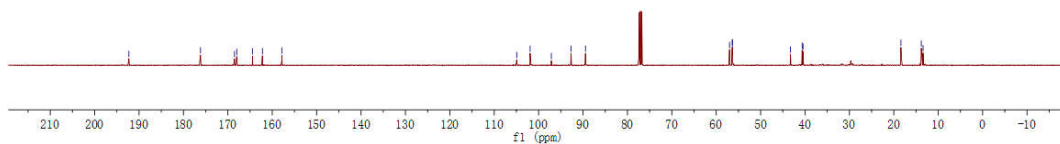

<sup>13</sup>C NMR spectrum of 3e (100 MHz, CDCl<sub>3</sub>)

DY20200807-NMR-02ZLGR-B6.1.fid

8.1113  
5.4486

4.8997  
3.8900  
3.8296  
3.1474  
3.1098  
3.0941  
2.5279  
2.5095  
2.4722  
2.4539

1.2547  
1.2275  
1.1870  
0.9870  
0.9696

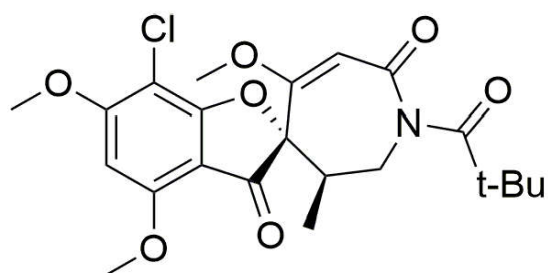

3f

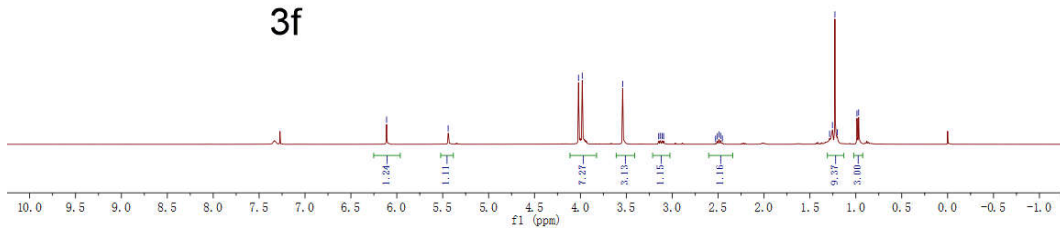

<sup>1</sup>H NMR spectrum of 3f (400 MHz, CDCl<sub>3</sub>)



DV20200814-NMR-02ZL-6a2.fid

153.56  
148.87  
148.47  
141.81  
137.85

105.76  
102.52  
97.22  
92.85  
88.32

57.00  
56.00  
51.73

41.18

27.98  
27.21

12.98

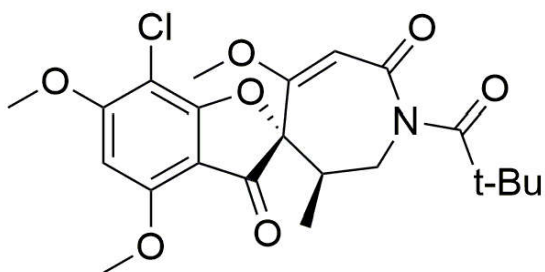

3f

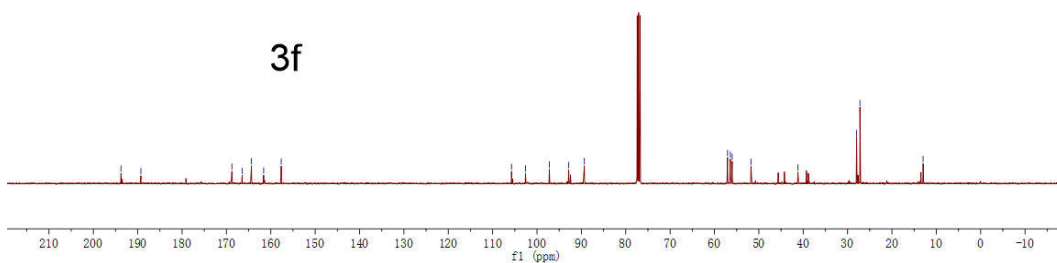

<sup>13</sup>C NMR spectrum of 3f (100 MHz, CDCl<sub>3</sub>)

DV20200807-NMR-02ZLGR-B7.1.fid

6.1069  
5.694  
4.2687  
4.2765  
4.2785  
4.2583  
4.0176  
3.7255  
3.7086  
3.6915  
3.6549  
3.5111  
3.2794  
3.2520  
3.2440  
3.2280  
3.2280  
3.2280  
3.2280  
2.9211  
2.9226  
2.9240  
2.9254  
2.4485  
2.4485  
1.5722  
1.5686  
1.5686  
1.5388  
1.5173  
1.5173  
1.5224  
1.5069  
1.4944  
1.4693  
1.3762  
1.3731  
1.3596  
1.3596  
1.3184  
1.2978  
1.0948  
1.0948

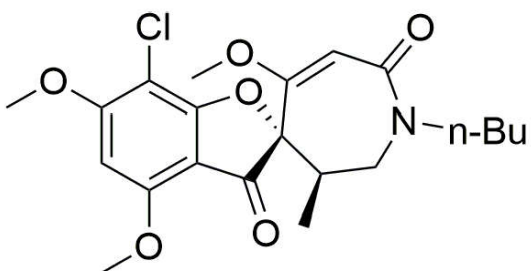

3g

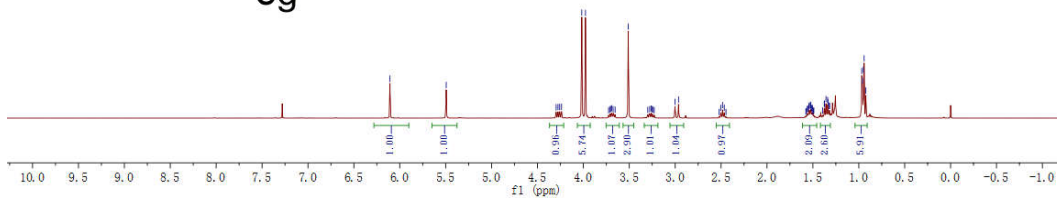

<sup>1</sup>H NMR spectrum of 3g (400 MHz, CDCl<sub>3</sub>)

DY20200807-NMR-04ZL-GR-B7. 1. f1d

194

168.97  
164.39  
157.54

105.02  
103.24  
97.21  
92.61  
85.20

55.08  
53.34  
51.71  
49.08  
48.20

39.35

30.34

20.20

13.95

13.97

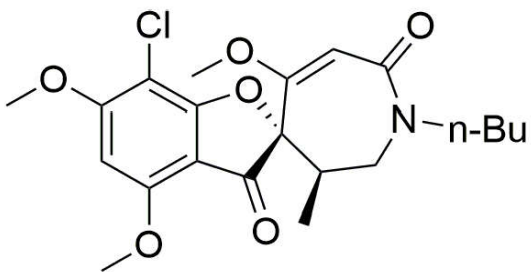

3g

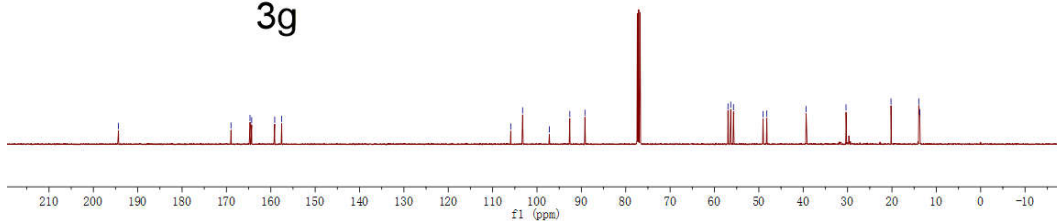

<sup>13</sup>C NMR spectrum of 3g (100 MHz, CDCl<sub>3</sub>)

DY20200807-NMR-02ZLGR-BS. 1. f1d

7.2194  
7.1875  
7.1869

6.6053

5.5697

4.2827  
4.2496  
4.2294  
4.1842  
3.9508  
3.8633  
3.7378  
3.7115  
3.6854  
3.6590  
3.5903  
3.5649  
3.5386  
3.5122  
3.4858  
3.4594  
3.4330  
3.4066  
3.3802  
3.3538  
3.3274  
3.3010  
3.2746  
3.2482  
3.2218  
3.1954  
3.1690  
3.1426  
3.1162  
3.0898  
3.0634  
3.0370  
3.0106  
2.9842  
2.9578  
2.9314  
2.9050  
2.8786  
2.8522  
2.8258  
2.8000  
2.7736  
2.7472  
2.7208  
2.6944  
2.6680  
2.6416  
2.6152  
2.5888  
2.5624  
2.5360  
2.5096  
2.4832  
2.4568  
2.4304  
2.4040  
2.3776  
2.3512  
2.3248  
2.2984  
2.2720  
2.2456  
2.2192  
2.1928  
2.1664  
2.1400  
2.1136  
2.0872  
2.0608  
2.0344  
2.0080  
1.9816  
1.9552  
1.9288  
1.9024  
1.8760  
1.8496  
1.8232  
1.7968  
1.7704  
1.7440  
1.7176  
1.6912  
1.6648  
1.6384  
1.6120  
1.5856  
1.5592  
1.5328  
1.5064  
1.4800  
1.4536  
1.4272  
1.4008  
1.3744  
1.3480  
1.3216  
1.2952  
1.2688  
1.2424  
1.2160  
1.1896  
1.1632  
1.1368  
1.1104  
1.0840  
1.0576  
1.0312  
1.0048  
0.9784  
0.9520  
0.9256  
0.8992  
0.8728  
0.8464  
0.8200  
0.7936  
0.7672  
0.7408  
0.7144  
0.6880  
0.6616  
0.6352  
0.6088  
0.5824  
0.5560  
0.5296  
0.5032  
0.4768  
0.4504  
0.4240  
0.3976  
0.3712  
0.3448  
0.3184  
0.2920  
0.2656  
0.2392  
0.2128  
0.1864  
0.1600  
0.1336  
0.1072  
0.0808  
0.0544  
0.0280  
0.0016

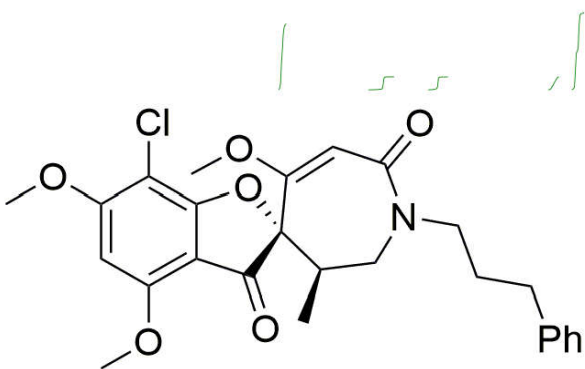

3h

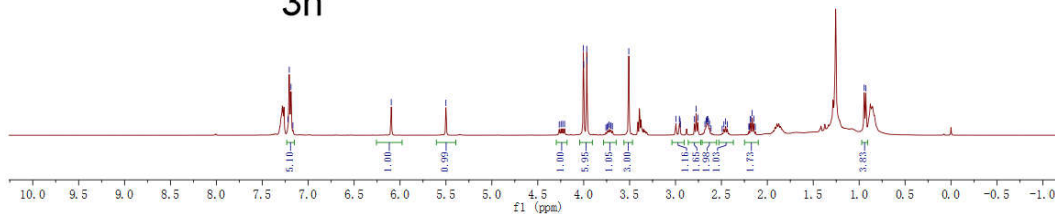

<sup>1</sup>H NMR spectrum of 3h (400 MHz, CDCl<sub>3</sub>)

DY20200807-NMR-04ZL-CR-B8.1.fid

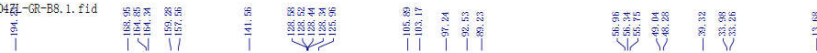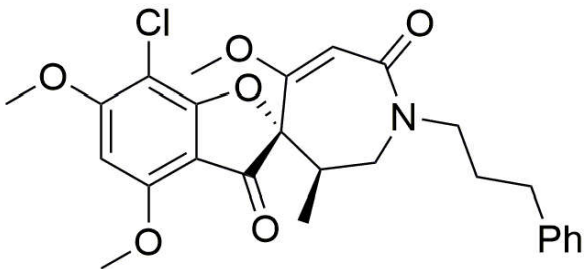

3h

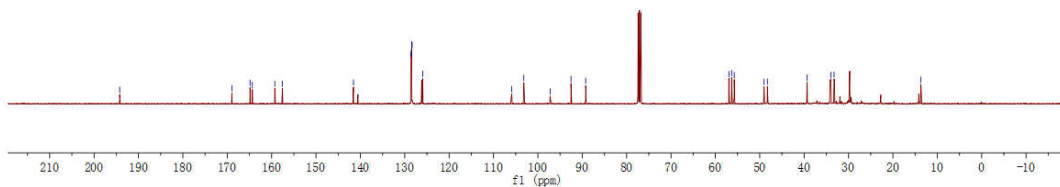

<sup>13</sup>C NMR spectrum of 3h (100 MHz, CDCl<sub>3</sub>)

DY20200807-NMR-02ZLGR-B9.1.fid

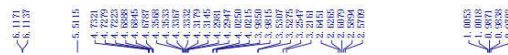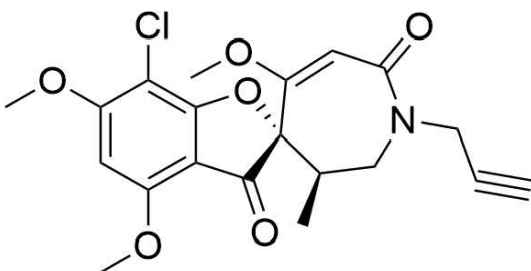

3i

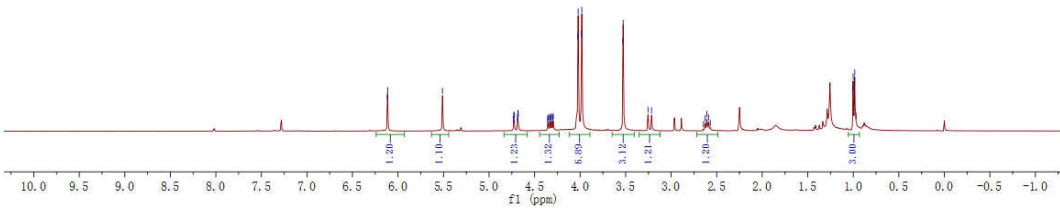

<sup>1</sup>H NMR spectrum of 3i (400 MHz, CDCl<sub>3</sub>)

DY20200807-NMR-04ZL-CR-B9. 1. f1d

154  
168.97  
164.88  
164.15  
157.98

105.94  
102.46  
97.23  
92.48  
88.25

78.81  
72.07

56.68  
56.35  
56.65

46.95  
39.05  
37.11

13.42

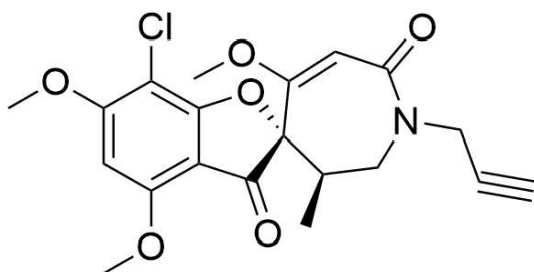

3i

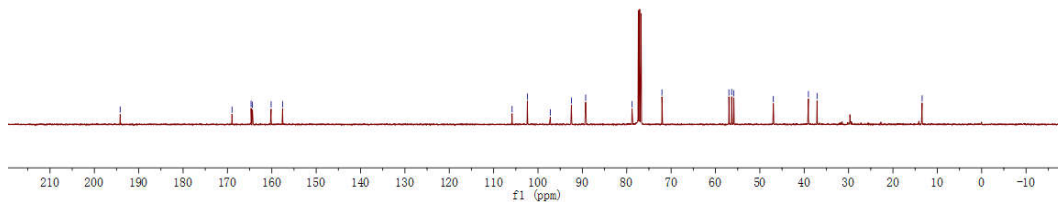

<sup>13</sup>C NMR spectrum of 3i (100 MHz, CDCl<sub>3</sub>)

DY20200807-NMR-02ZLGR-B10. 1. f1d

202.02  
171.34  
170.96  
168.73  
168.41  
168.20

6.1192

5.8655

4.6153  
4.5771  
4.5577

4.0294  
3.2651

3.5376  
3.5075  
3.4654

2.7760  
2.7290  
2.7210  
2.7026

1.0290  
1.0095

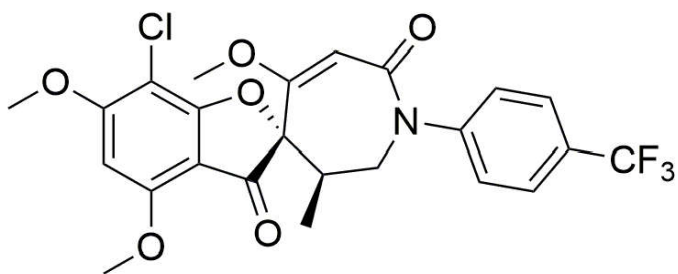

3j

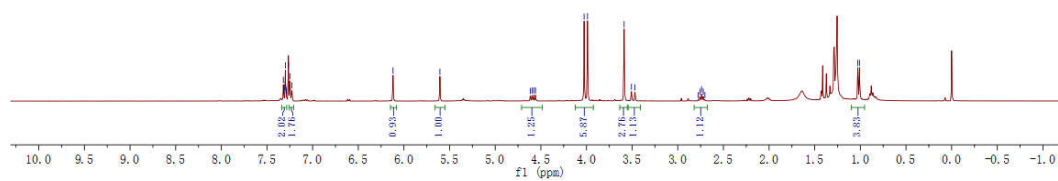

<sup>1</sup>H NMR spectrum of 3j (400 MHz, CDCl<sub>3</sub>)

DY20200807-NMR-0471-CR-B10.1.fid

157.46  
157.09  
156.95  
156.94  
156.93  
156.92  
156.91  
156.90  
156.89  
156.88  
156.87

147.22  
142.87

129.94  
127.89  
121.70

105.72  
102.82  
97.31  
92.43  
83.34

57.00  
56.84  
51.52

39.75

13.59

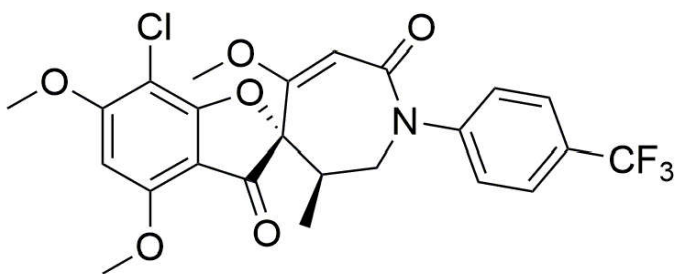

3j

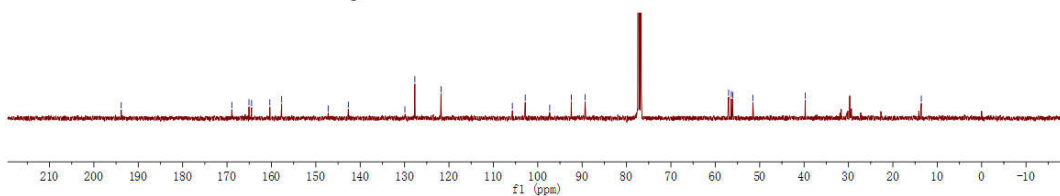

<sup>13</sup>C NMR spectrum of 3j (100 MHz, CDCl<sub>3</sub>)

DY20200807-NMR-02ZLGR-B11.1.fid

7.3791  
7.3542  
7.3535  
7.2273  
7.2119  
7.2056

6.1189

5.6085  
5.5985

4.5944  
4.5592  
4.5587

4.0244  
3.8885

3.5907  
3.4890  
3.4518

2.7680  
2.7475  
2.7186  
2.6922

1.0182  
0.9990

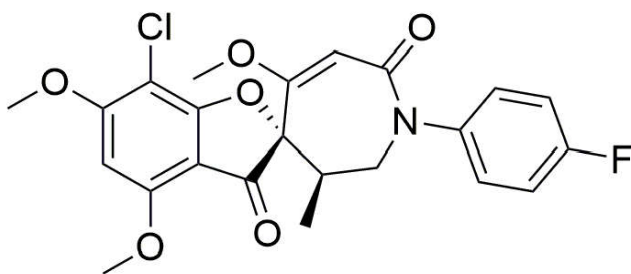

3k

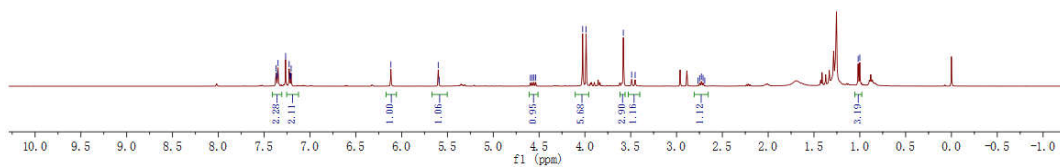

<sup>1</sup>H NMR spectrum of 3k (400 MHz, CDCl<sub>3</sub>)

DY20200807-NMR-0471-GR-B11.1.fid

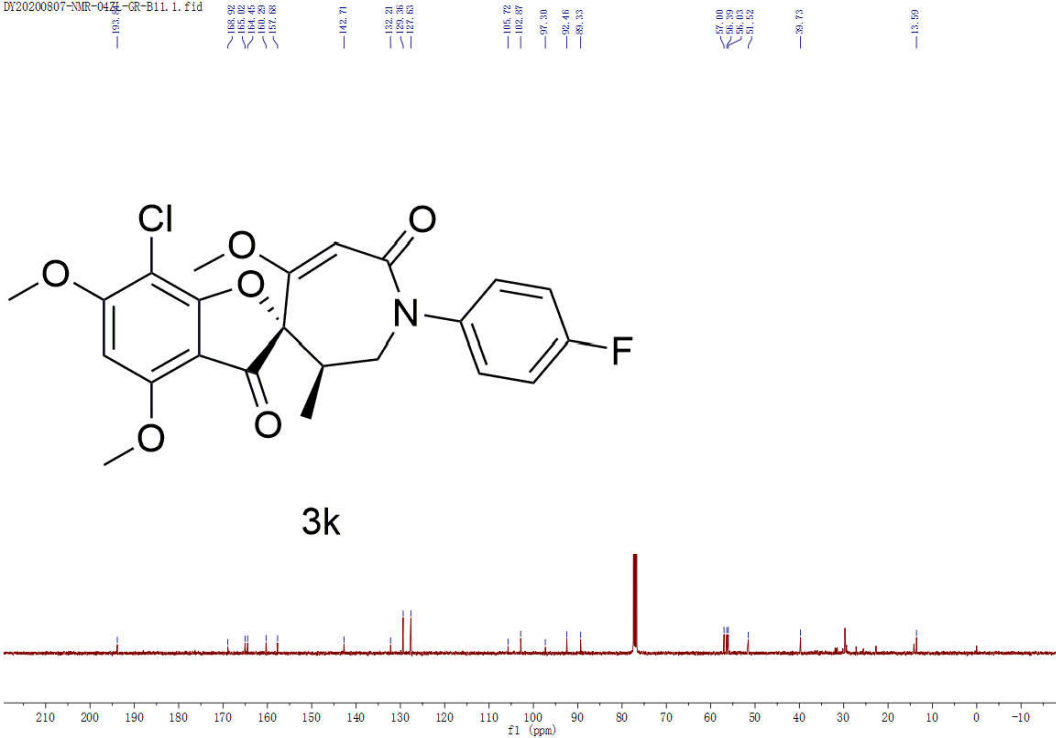

### <sup>13</sup>C NMR spectrum of 3k (100 MHz, CDCl<sub>3</sub>)

DY20200810-NMR-02GR-B12.1.fid

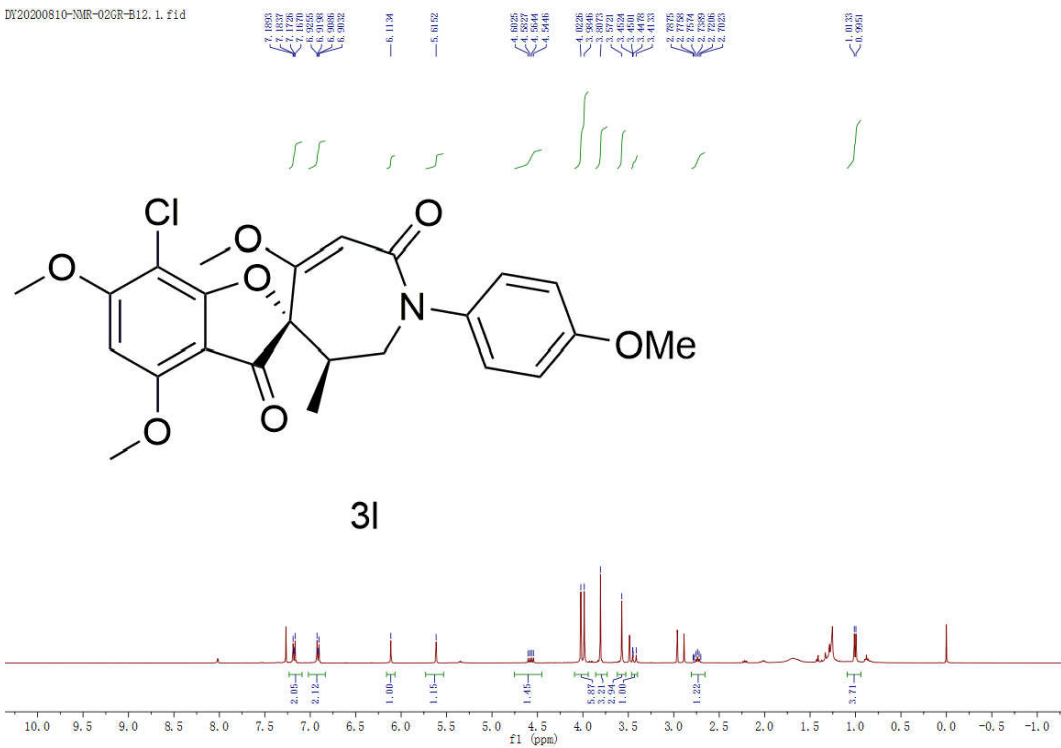

### <sup>1</sup>H NMR spectrum of 3l (400 MHz, CDCl<sub>3</sub>)

DV20200811-NMR-03GR-B12.1.fid

168.96  
168.37  
164.38  
159.91  
157.86

137.32

127.36

114.52

105.85

103.26

97.29

92.85

88.27

56.89  
56.37  
55.95  
51.89

39.89

13.82

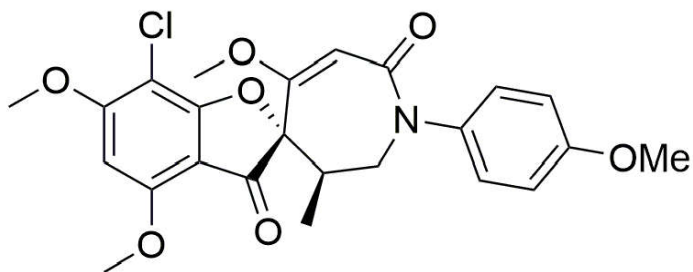

3l

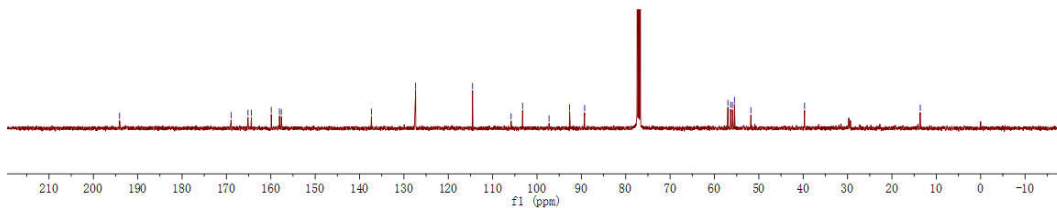

<sup>13</sup>C NMR spectrum of 3l (100 MHz, CDCl<sub>3</sub>)

DV20200626-NMR-01GR-3E

8.1372  
8.1246  
8.1184  
8.1104  
8.1037  
7.9222  
7.8779  
7.8844

6.2298  
6.2295

5.3298  
5.3269  
5.3217  
4.8880  
4.8155  
4.8010  
4.7883  
4.7820

3.9024

3.4921

2.4772  
2.4672  
2.4591  
2.4488  
2.4386  
2.4225  
2.4135  
2.4045  
2.3945  
2.3782

0.9826  
0.8247

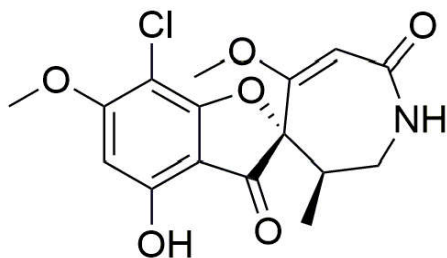

4

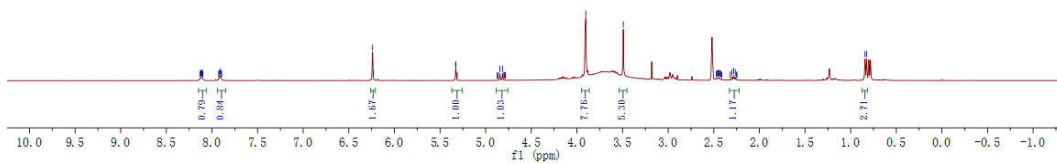

<sup>1</sup>H NMR spectrum of 4 (400 MHz, DMSO-d<sub>6</sub>)

DV20200626-NMR-01GR-3B. 2. f1d

193.06  
167.77  
166.26  
165.39  
157.26

104.38  
99.10  
94.37  
92.79

57.23  
56.23  
44.93  
39.03

12.92

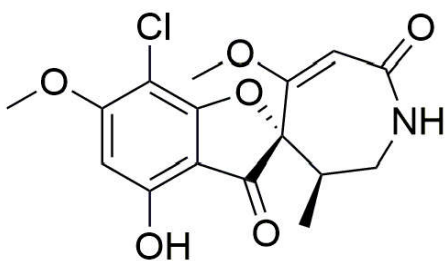

4

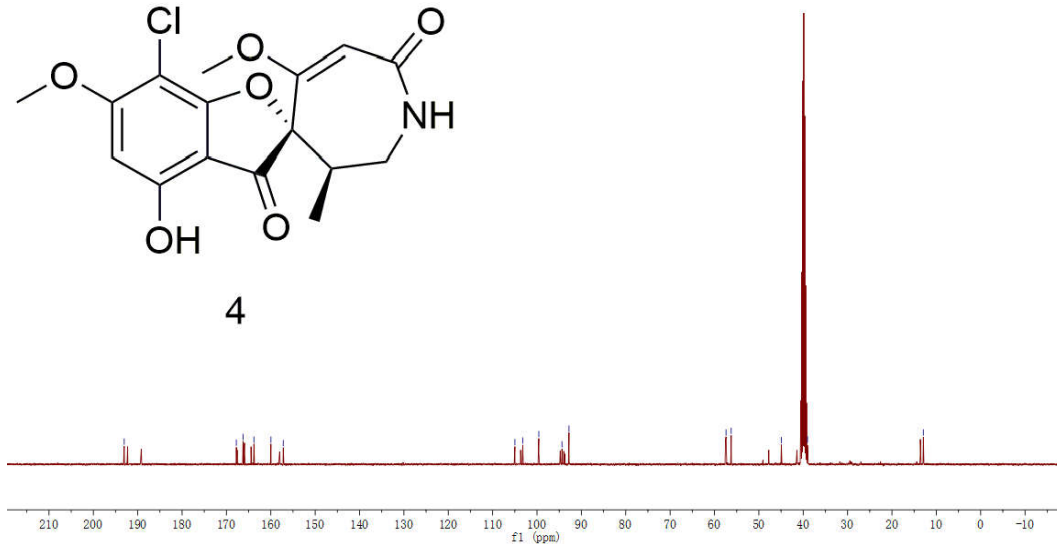

<sup>13</sup>C NMR spectrum of 4 (100 MHz, DMSO-d<sub>6</sub>)

DV20200613-NMR-02GR-4B1. 1. f1d

7.4905  
7.4401  
7.3808  
7.3319

6.3278  
6.1474

5.4493  
5.2717

4.0195  
3.9690  
3.9186

3.5492

3.1335  
3.0538  
2.9739

2.5245  
2.4845  
2.4637

1.0297  
0.8590

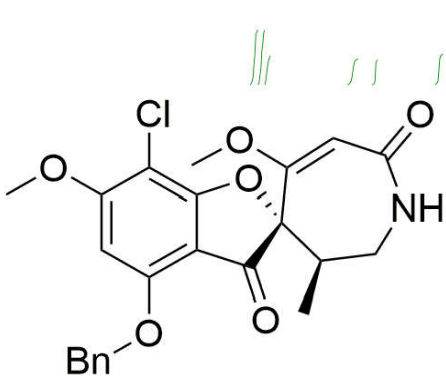

5a

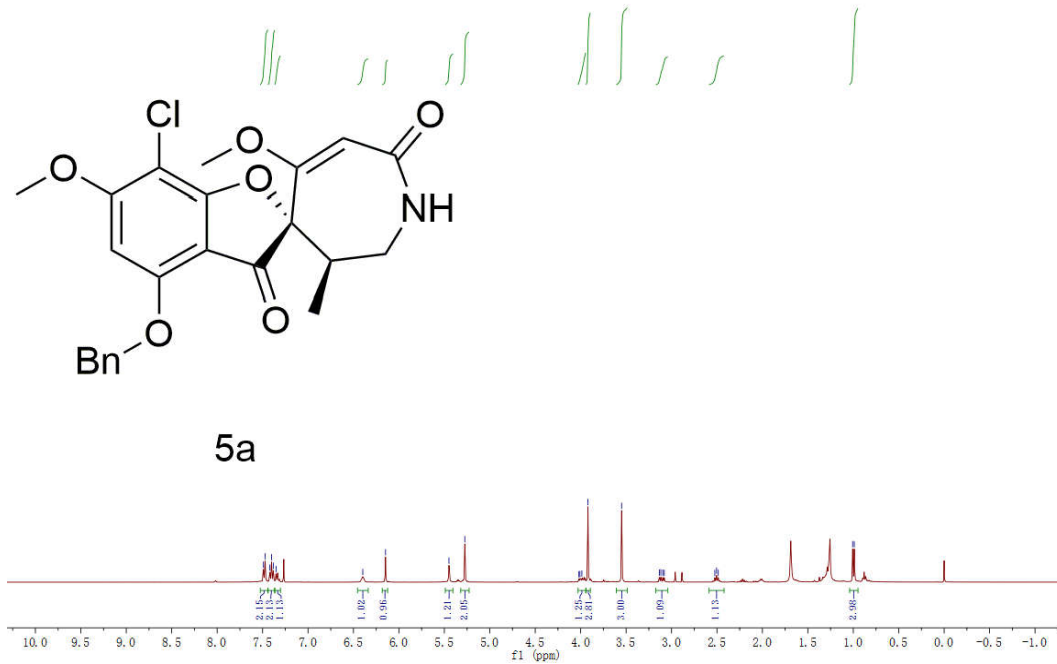

<sup>1</sup>H NMR spectrum of 5a (400 MHz, CDCl<sub>3</sub>)



DV20200817-NMR-0274-2.1.fid

197.3  
162.76  
162.85  
161.86  
158.56

135.55  
128.31  
128.86

106.31  
102.04  
92.88  
91.46

71.13

56.91  
55.96

41.19  
38.98

13.08

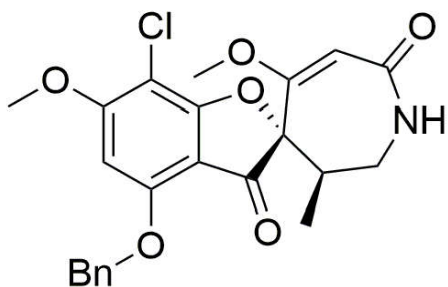

5a

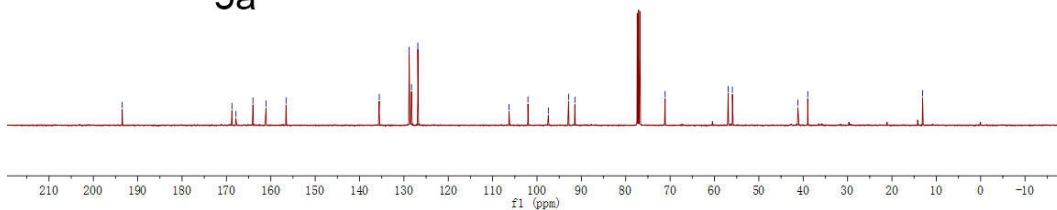

<sup>13</sup>C NMR spectrum of 5a (100 MHz, CDCl<sub>3</sub>)

DV20200613-NMR-02GR-4B2.1.fid

8.1142

5.4197

4.1297

4.1114

4.0941

4.0810

3.5286

3.1191

3.1032

3.0873

3.0627

2.5104

2.4733

1.9270

1.8952

1.8590

1.8416

1.8243

1.0145

0.9918

0.9687

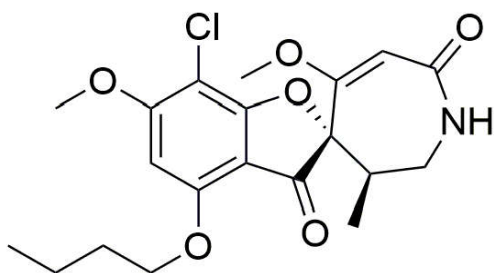

5b

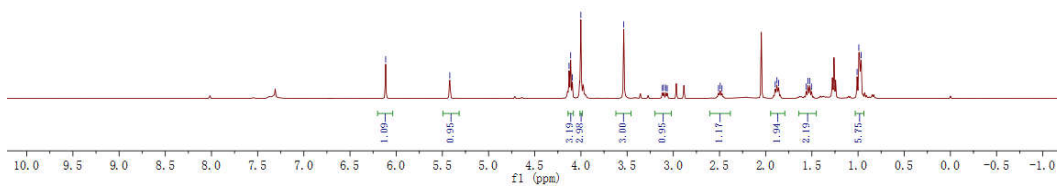

<sup>1</sup>H NMR spectrum of 5b (400 MHz, CDCl<sub>3</sub>)

DV20200626-NMR-01GR-4B2. 1. f1d

197.3  
168.71  
168.06  
161.10  
157.34

105.94  
101.55  
96.78  
92.74  
90.20

69.20  
56.90  
55.89

41.88  
38.99

30.76  
19.07  
13.81  
13.68

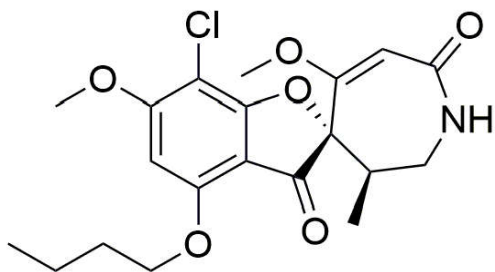

5b

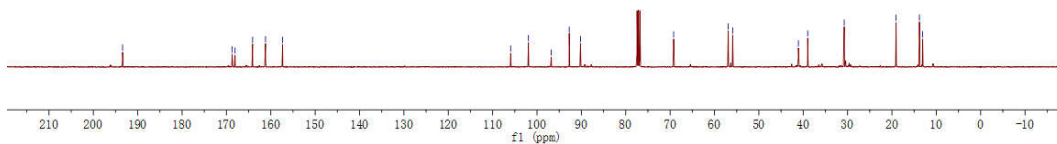

<sup>13</sup>C NMR spectrum of 5b (100 MHz, CDCl<sub>3</sub>)

DV20200626-NMR-01GR-4B3. 1. f1d

6.3843  
5.4382  
5.4321  
4.9195  
4.9140  
4.9105  
4.2877  
4.0219  
3.9674  
3.9421  
3.9335  
3.9046  
3.5292  
3.5155  
3.1490  
3.1240  
1.894  
2.5086  
2.5031  
2.4694  
0.9917  
0.9737

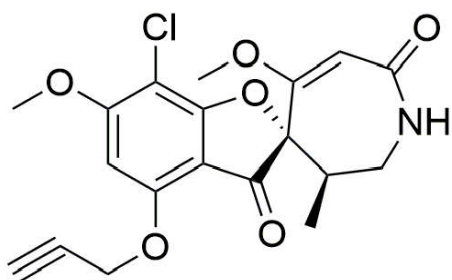

5c

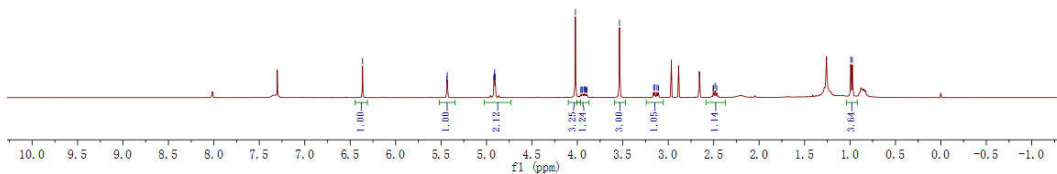

<sup>1</sup>H NMR spectrum of 5c (400 MHz, CDCl<sub>3</sub>)

DV20200626-NMR-01GR-4B3. 2. f1d

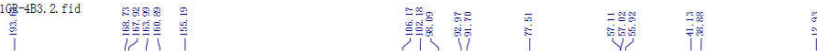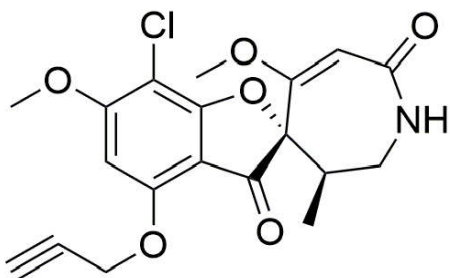

5c

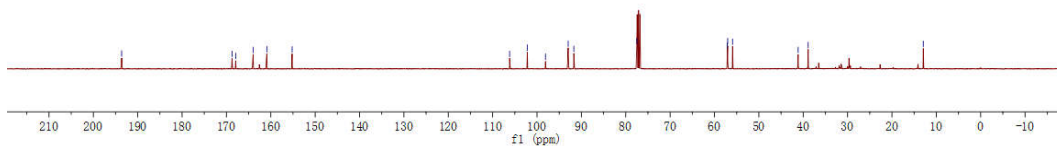

<sup>13</sup>C NMR spectrum of 5c (100 MHz, CDCl<sub>3</sub>)

DV20200626-NMR-01GR-4B4. 1. f1d

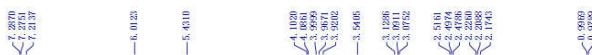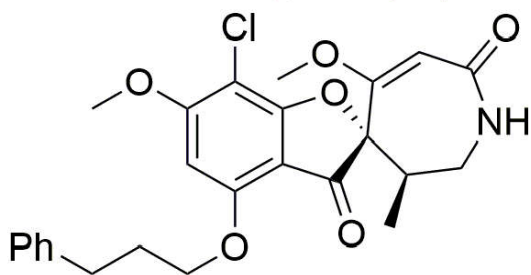

5d

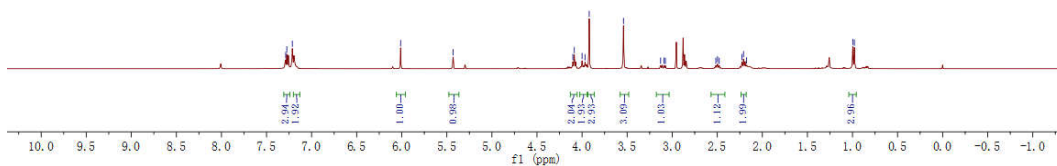

<sup>1</sup>H NMR spectrum of 5d (400 MHz, CDCl<sub>3</sub>)

D:\20200626-NMR-01GB-4B4.2.fid

193.3  
161.1  
151.1  
141.1  
131.1  
121.1  
111.1  
101.1  
91.1  
81.1  
71.1  
61.1  
51.1  
41.1  
31.1  
21.1  
11.1

140.96

98.72  
98.72  
98.72

20

102.00

96.97

18.26

96.38

86.07

54.25

69.82

41.15

39.01

31.58

30.06

13.09

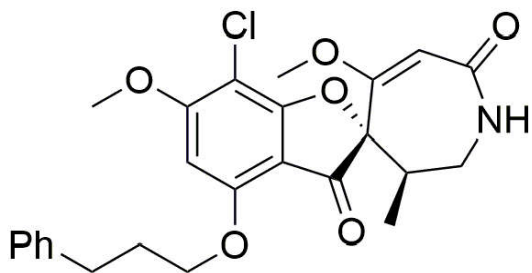

5d

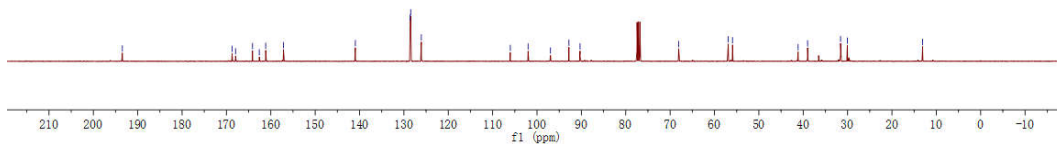

<sup>13</sup>C NMR spectrum of 5d (100 MHz, CDCl<sub>3</sub>)

8.3004

8.1819

4.9483

4.9119

4.8532

4.7079

4.6745

4.6172

4.0006

3.8819

2.6220

2.5870

2.5520

2.5170

2.4820

2.4470

2.4120

2.3770

1.0792

1.0612

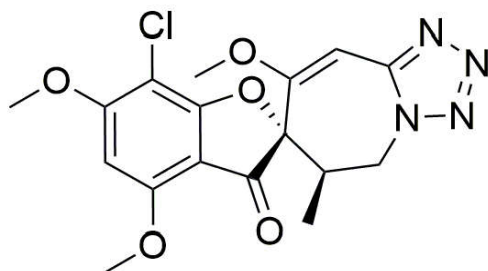

6

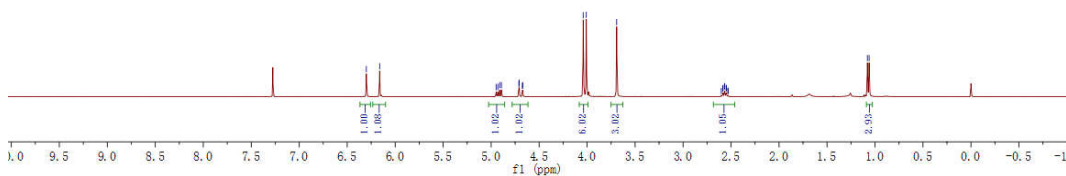

<sup>1</sup>H NMR spectrum of 6 (400 MHz, CDCl<sub>3</sub>)

20191113FC0002ZL-C6-2.1.fid

193.86  
168.14  
164.71  
158.00  
148.73

104.99  
97.49  
90.95  
88.30  
85.19

57.09  
56.59  
56.47

47.05

34.83

11.34

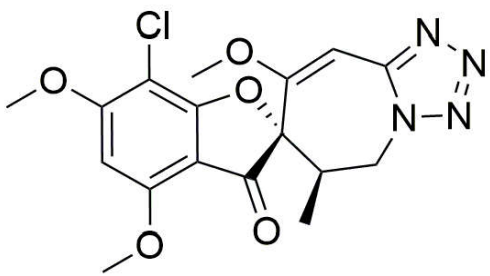

6

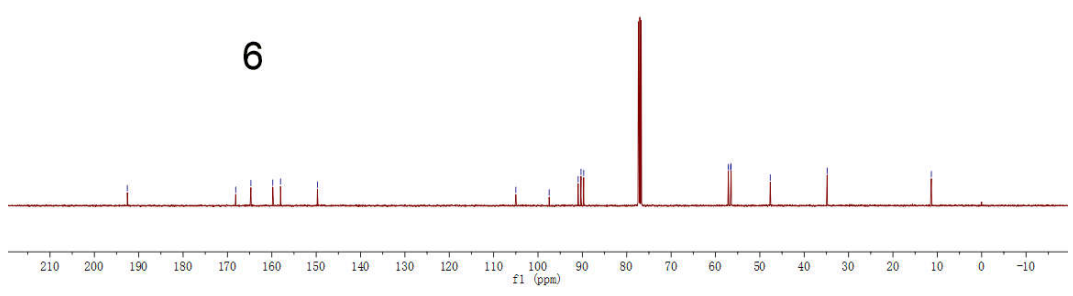

<sup>13</sup>C NMR spectrum of 6 (100 MHz, CDCl<sub>3</sub>)

20191205FC0009ZL-GR-3A.1.fid

6.3491  
6.2580  
4.3212  
4.1845  
4.0876  
4.0223  
4.7294  
4.1245  
3.8877  
3.7280  
2.6133  
2.6095  
2.5915  
2.5770  
2.5680  
2.5430  
2.5395  
1.0934  
1.0754

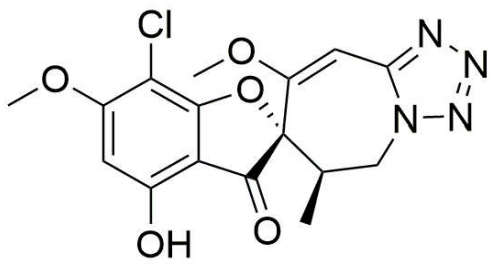

7

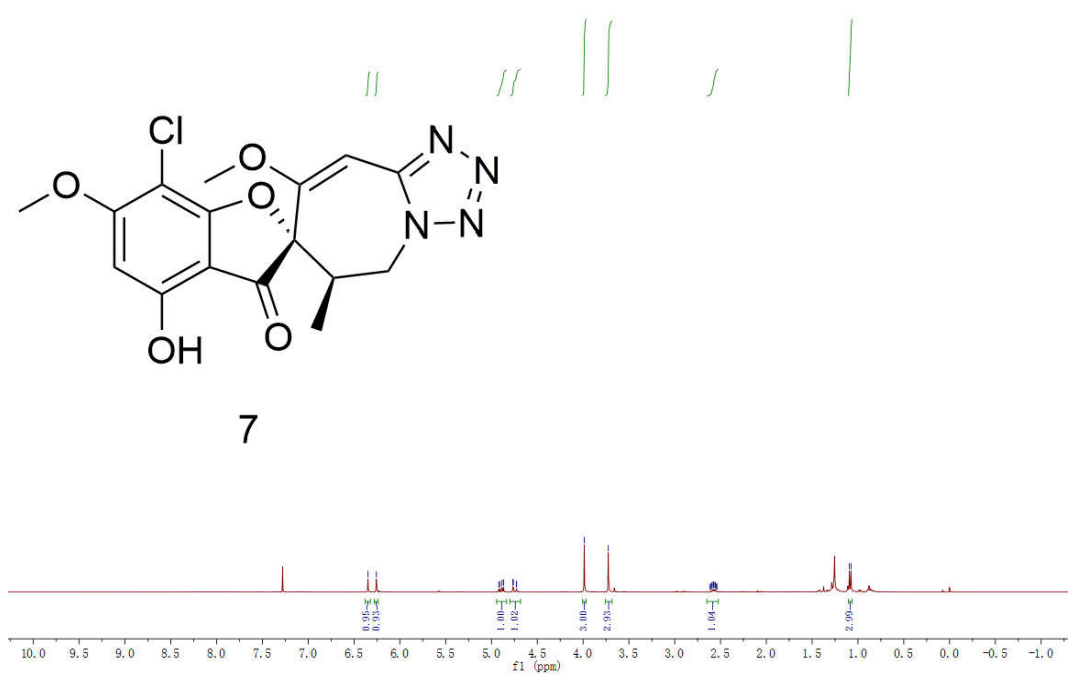

<sup>1</sup>H NMR spectrum of 7 (400 MHz, CDCl<sub>3</sub>)

20200520DY-ZL-GR-3A.1.fid

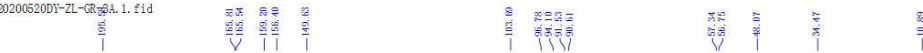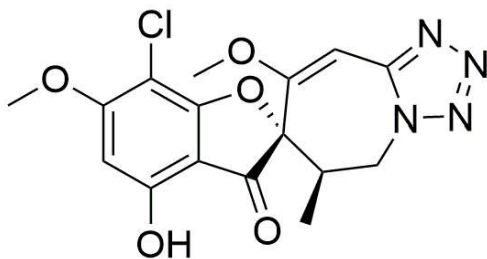

7

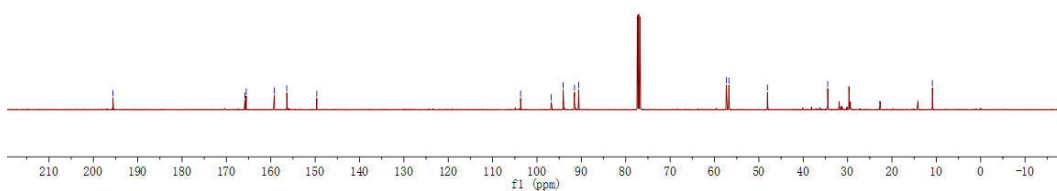

<sup>13</sup>C NMR spectrum of 7 (100 MHz, CDCl<sub>3</sub>)

20200520DY-ZL-GR-4A.1.fid

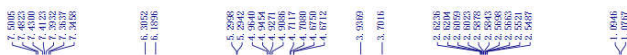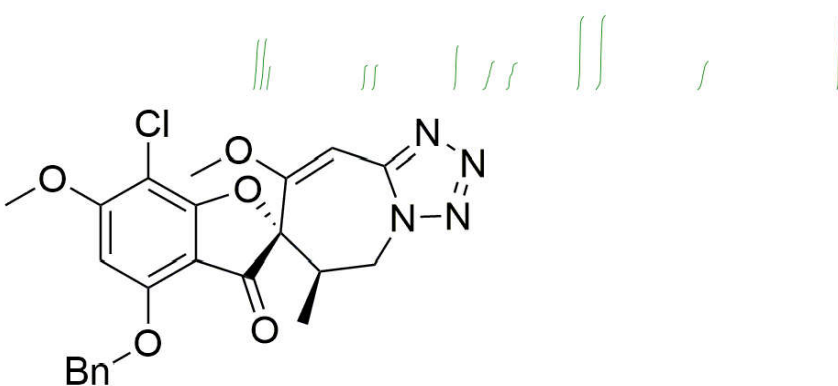

8a

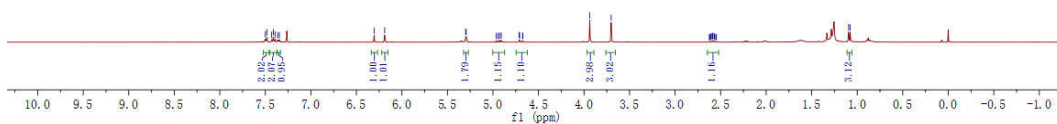

<sup>1</sup>H NMR spectrum of 8a (400 MHz, CDCl<sub>3</sub>)

DY20200817-NMR-02ZLg1.1.fid

158.09  
157.96  
156.96  
143.76  
135.37  
128.46  
126.65  
105.45  
97.04  
91.77  
90.15  
71.18  
57.05  
56.94  
47.02  
34.79  
11.45

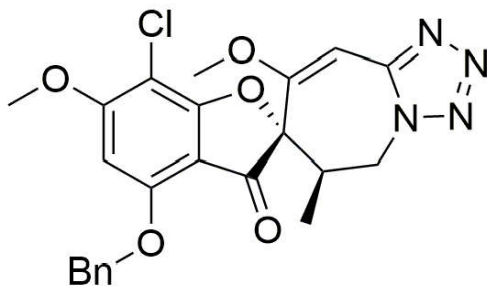

8a

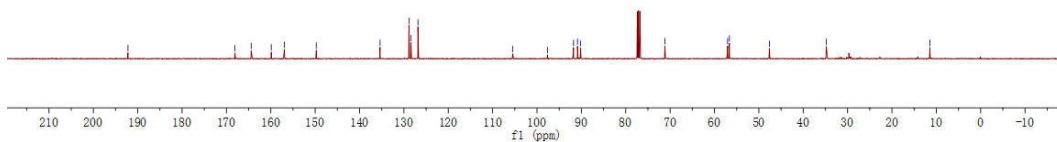

<sup>13</sup>C NMR spectrum of 8a (100 MHz, CDCl<sub>3</sub>)

DY20200810-NMR-02GR-4A2.1.fid

6.2859  
6.1537  
4.9526  
4.8386  
4.7056  
4.6863  
4.1571  
4.1486  
4.1240  
4.0246  
3.6956  
2.8273  
2.8110  
2.5780  
1.9379  
1.8547  
1.5722  
1.5576  
1.2897  
1.0865  
1.0020  
0.8812

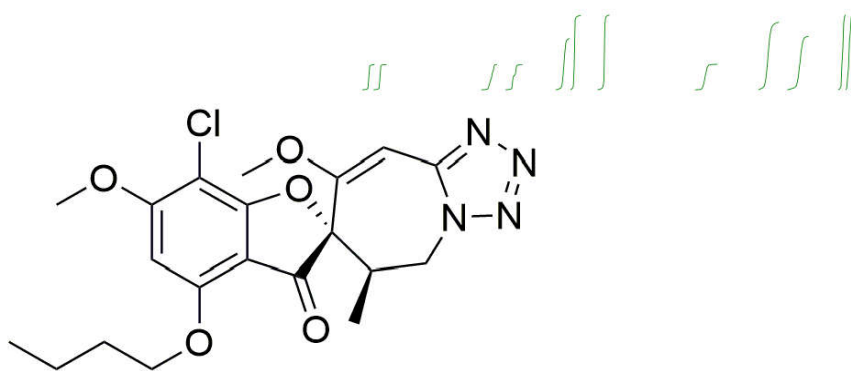

8b

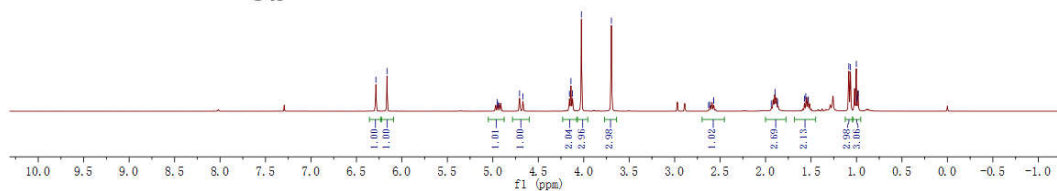

<sup>1</sup>H NMR spectrum of 8b (400 MHz, CDCl<sub>3</sub>)

DY20200811-NMR-03GR-4A2.1.fid

198.27  
168.06  
166.05  
157.75  
143.77  
105.12  
97.02  
90.23  
80.54  
68.56  
69.33  
57.05  
56.60  
47.56  
34.80  
30.75  
19.08  
13.83  
11.49

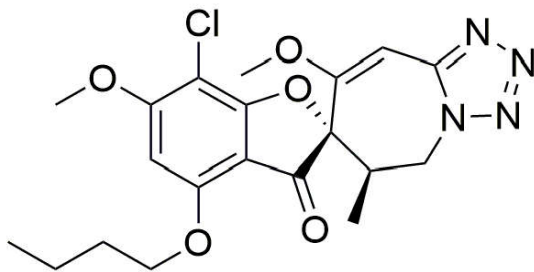

8b

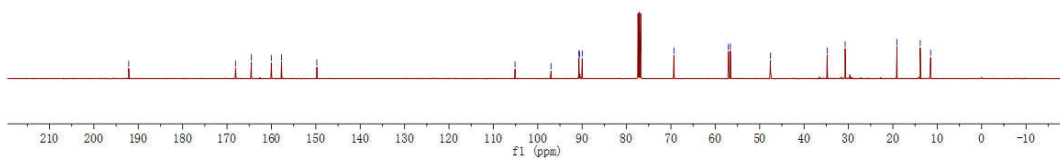

**<sup>13</sup>C NMR spectrum of 8b (100 MHz, CDCl<sub>3</sub>)**

DY20200810-NMR-02GR-4A3.1.fid

6.3144  
6.2594  
4.9320  
4.7320  
4.6762  
4.0479  
3.7011  
2.0580  
2.0285  
2.0223  
1.0837  
1.0525  
1.0394

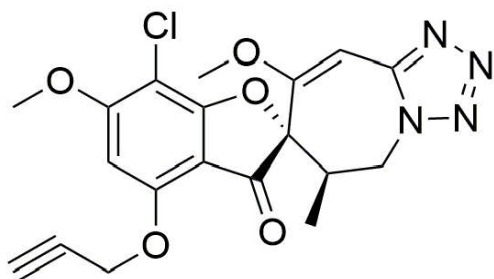

8c

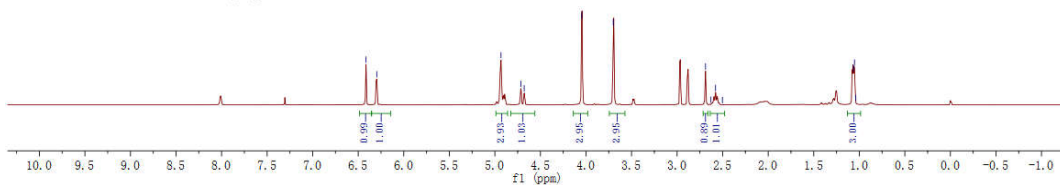

**<sup>1</sup>H NMR spectrum of 8c (400 MHz, CDCl<sub>3</sub>)**



DY20200811-NMR-03GR-4A3.1.fid

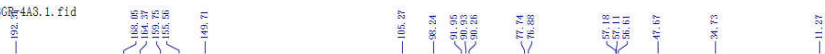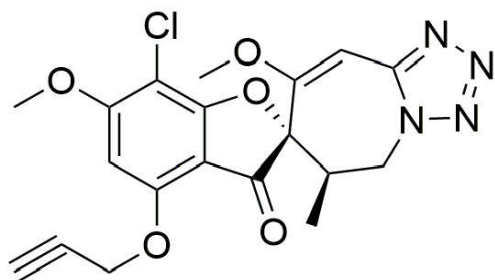

8c

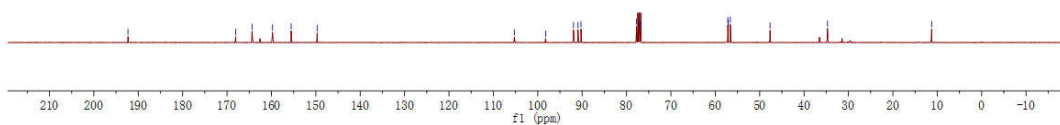

<sup>13</sup>C NMR spectrum of 8c (100 MHz, CDCl<sub>3</sub>)

DY20200810-NMR-02GR-4A4.1.fid

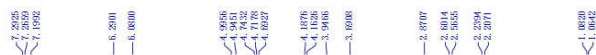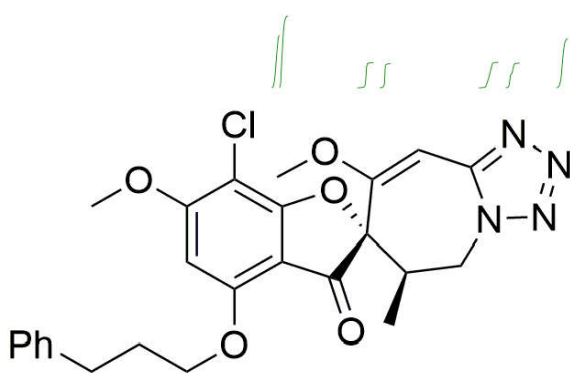

8d

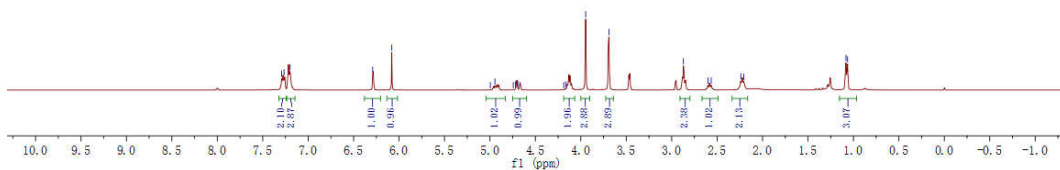

<sup>1</sup>H NMR spectrum of 8d (400 MHz, CDCl<sub>3</sub>)

DV20200811-NMR-03GR-4A4.1.fid

193.86  
168.25  
168.09  
157.56  
143.86  
143.90  
128.56  
128.12  
105.15  
97.14  
90.77  
90.67  
90.63  
68.21  
57.09  
56.53  
47.82  
34.77  
31.59  
30.87  
11.44

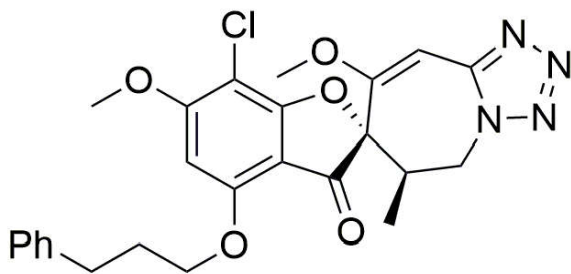

8d

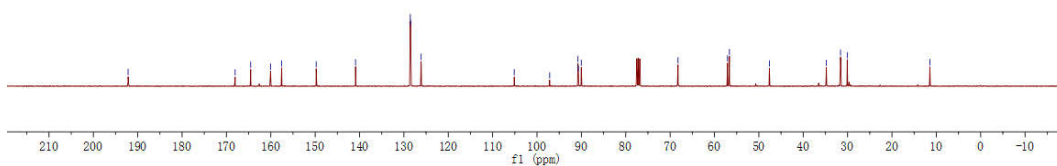

<sup>13</sup>C NMR spectrum of 8d (100 MHz, CDCl<sub>3</sub>)

DV20210427-NMR-03ZL-0426.1.fid

7.2886  
7.5487  
8.1447  
4.0234  
4.0230  
4.0226  
3.9649  
3.9645  
3.9642  
3.9638  
3.9634  
3.9630  
3.9626  
3.9622  
3.9618  
3.9614  
3.9610  
3.9606  
3.9602  
3.9598  
3.9594  
3.9590  
3.9586  
3.9582  
3.9578  
3.9574  
3.9570  
3.9566  
3.9562  
3.9558  
3.9554  
3.9550  
3.9546  
3.9542  
3.9538  
3.9534  
3.9530  
3.9526  
3.9522  
3.9518  
3.9514  
3.9510  
3.9506  
3.9502  
3.9498  
3.9494  
3.9490  
3.9486  
3.9482  
3.9478  
3.9474  
3.9470  
3.9466  
3.9462  
3.9458  
3.9454  
3.9450  
3.9446  
3.9442  
3.9438  
3.9434  
3.9430  
3.9426  
3.9422  
3.9418  
3.9414  
3.9410  
3.9406  
3.9402  
3.9398  
3.9394  
3.9390  
3.9386  
3.9382  
3.9378  
3.9374  
3.9370  
3.9366  
3.9362  
3.9358  
3.9354  
3.9350  
3.9346  
3.9342  
3.9338  
3.9334  
3.9330  
3.9326  
3.9322  
3.9318  
3.9314  
3.9310  
3.9306  
3.9302  
3.9298  
3.9294  
3.9290  
3.9286  
3.9282  
3.9278  
3.9274  
3.9270  
3.9266  
3.9262  
3.9258  
3.9254  
3.9250  
3.9246  
3.9242  
3.9238  
3.9234  
3.9230  
3.9226  
3.9222  
3.9218  
3.9214  
3.9210  
3.9206  
3.9202  
3.9198  
3.9194  
3.9190  
3.9186  
3.9182  
3.9178  
3.9174  
3.9170  
3.9166  
3.9162  
3.9158  
3.9154  
3.9150  
3.9146  
3.9142  
3.9138  
3.9134  
3.9130  
3.9126  
3.9122  
3.9118  
3.9114  
3.9110  
3.9106  
3.9102  
3.9098  
3.9094  
3.9090  
3.9086  
3.9082  
3.9078  
3.9074  
3.9070  
3.9066  
3.9062  
3.9058  
3.9054  
3.9050  
3.9046  
3.9042  
3.9038  
3.9034  
3.9030  
3.9026  
3.9022  
3.9018  
3.9014  
3.9010  
3.9006  
3.9002  
3.8998  
3.8994  
3.8990  
3.8986  
3.8982  
3.8978  
3.8974  
3.8970  
3.8966  
3.8962  
3.8958  
3.8954  
3.8950  
3.8946  
3.8942  
3.8938  
3.8934  
3.8930  
3.8926  
3.8922  
3.8918  
3.8914  
3.8910  
3.8906  
3.8902  
3.8898  
3.8894  
3.8890  
3.8886  
3.8882  
3.8878  
3.8874  
3.8870  
3.8866  
3.8862  
3.8858  
3.8854  
3.8850  
3.8846  
3.8842  
3.8838  
3.8834  
3.8830  
3.8826  
3.8822  
3.8818  
3.8814  
3.8810  
3.8806  
3.8802  
3.8798  
3.8794  
3.8790  
3.8786  
3.8782  
3.8778  
3.8774  
3.8770  
3.8766  
3.8762  
3.8758  
3.8754  
3.8750  
3.8746  
3.8742  
3.8738  
3.8734  
3.8730  
3.8726  
3.8722  
3.8718  
3.8714  
3.8710  
3.8706  
3.8702  
3.8698  
3.8694  
3.8690  
3.8686  
3.8682  
3.8678  
3.8674  
3.8670  
3.8666  
3.8662  
3.8658  
3.8654  
3.8650  
3.8646  
3.8642  
3.8638  
3.8634  
3.8630  
3.8626  
3.8622  
3.8618  
3.8614  
3.8610  
3.8606  
3.8602  
3.8598  
3.8594  
3.8590  
3.8586  
3.8582  
3.8578  
3.8574  
3.8570  
3.8566  
3.8562  
3.8558  
3.8554  
3.8550  
3.8546  
3.8542  
3.8538  
3.8534  
3.8530  
3.8526  
3.8522  
3.8518  
3.8514  
3.8510  
3.8506  
3.8502  
3.8498  
3.8494  
3.8490  
3.8486  
3.8482  
3.8478  
3.8474  
3.8470  
3.8466  
3.8462  
3.8458  
3.8454  
3.8450  
3.8446  
3.8442  
3.8438  
3.8434  
3.8430  
3.8426  
3.8422  
3.8418  
3.8414  
3.8410  
3.8406  
3.8402  
3.8398  
3.8394  
3.8390  
3.8386  
3.8382  
3.8378  
3.8374  
3.8370  
3.8366  
3.8362  
3.8358  
3.8354  
3.8350  
3.8346  
3.8342  
3.8338  
3.8334  
3.8330  
3.8326  
3.8322  
3.8318  
3.8314  
3.8310  
3.8306  
3.8302  
3.8298  
3.8294  
3.8290  
3.8286  
3.8282  
3.8278  
3.8274  
3.8270  
3.8266  
3.8262  
3.8258  
3.8254  
3.8250  
3.8246  
3.8242  
3.8238  
3.8234  
3.8230  
3.8226  
3.8222  
3.8218  
3.8214  
3.8210  
3.8206  
3.8202  
3.8198  
3.8194  
3.8190  
3.8186  
3.8182  
3.8178  
3.8174  
3.8170  
3.8166  
3.8162  
3.8158  
3.8154  
3.8150  
3.8146  
3.8142  
3.8138  
3.8134  
3.8130  
3.8126  
3.8122  
3.8118  
3.8114  
3.8110  
3.8106  
3.8102  
3.8098  
3.8094  
3.8090  
3.8086  
3.8082  
3.8078  
3.8074  
3.8070  
3.8066  
3.8062  
3.8058  
3.8054  
3.8050  
3.8046  
3.8042  
3.8038  
3.8034  
3.8030  
3.8026  
3.8022  
3.8018  
3.8014  
3.8010  
3.8006  
3.8002  
3.7998  
3.7994  
3.7990  
3.7986  
3.7982  
3.7978  
3.7974  
3.7970  
3.7966  
3.7962  
3.7958  
3.7954  
3.7950  
3.7946  
3.7942  
3.7938  
3.7934  
3.7930  
3.7926  
3.7922  
3.7918  
3.7914  
3.7910  
3.7906  
3.7902  
3.7898  
3.7894  
3.7890  
3.7886  
3.7882  
3.7878  
3.7874  
3.7870  
3.7866  
3.7862  
3.7858  
3.7854  
3.7850  
3.7846  
3.7842  
3.7838  
3.7834  
3.7830  
3.7826  
3.7822  
3.7818  
3.7814  
3.7810  
3.7806  
3.7802  
3.7798  
3.7794  
3.7790  
3.7786  
3.7782  
3.7778  
3.7774  
3.7770  
3.7766  
3.7762  
3.7758  
3.7754  
3.7750  
3.7746  
3.7742  
3.7738  
3.7734  
3.7730  
3.7726  
3.7722  
3.7718  
3.7714  
3.7710  
3.7706  
3.7702  
3.7698  
3.7694  
3.7690  
3.7686  
3.7682  
3.7678  
3.7674  
3.7670  
3.7666  
3.7662  
3.7658  
3.7654  
3.7650  
3.7646  
3.7642  
3.7638  
3.7634  
3.7630  
3.7626  
3.7622  
3.7618  
3.7614  
3.7610  
3.7606  
3.7602  
3.7598  
3.7594  
3.7590  
3.7586  
3.7582  
3.7578  
3.7574  
3.7570  
3.7566  
3.7562  
3.7558  
3.7554  
3.7550  
3.7546  
3.7542  
3.7538  
3.7534  
3.7530  
3.7526  
3.7522  
3.7518  
3.7514  
3.7510  
3.7506  
3.7502  
3.7498  
3.7494  
3.7490  
3.7486  
3.7482  
3.7478  
3.7474  
3.7470  
3.7466  
3.7462  
3.7458  
3.7454  
3.7450  
3.7446  
3.7442  
3.7438  
3.7434  
3.7430  
3.7426  
3.7422  
3.7418  
3.7414  
3.7410  
3.7406  
3.7402  
3.7398  
3.7394  
3.7390  
3.7386  
3.7382  
3.7378  
3.7374  
3.7370  
3.7366  
3.7362  
3.7358  
3.7354  
3.7350  
3.7346  
3.7342  
3.7338  
3.7334  
3.7330  
3.7326  
3.7322  
3.7318  
3.7314  
3.7310  
3.7306  
3.7302  
3.7298  
3.7294  
3.7290  
3.7286  
3.7282  
3.7278  
3.7274  
3.7270  
3.7266  
3.7262  
3.7258  
3.7254  
3.7250  
3.7246  
3.7242  
3.7238  
3.7234  
3.7230  
3.7226  
3.7222  
3.7218  
3.7214  
3.7210  
3.7206  
3.7202  
3.7198  
3.7194  
3.7190  
3.7186  
3.7182  
3.7178  
3.7174  
3.7170  
3.7166  
3.7162  
3.7158  
3.7154  
3.7150  
3.7146  
3.7142  
3.7138  
3.7134  
3.7130  
3.7126  
3.7122  
3.7118  
3.7114  
3.7110  
3.7106  
3.7102  
3.7098  
3.7094  
3.7090  
3.7086  
3.7082  
3.7078  
3.7074  
3.7070  
3.7066  
3.7062  
3.7058  
3.7054  
3.7050  
3.7046  
3.7042  
3.7038  
3.7034  
3.7030  
3.7026  
3.7022  
3.7018  
3.7014  
3.7010  
3.7006  
3.7002  
3.6998  
3.6994  
3.6990  
3.6986  
3.6982  
3.6978  
3.6974  
3.6970  
3.6966  
3.6962  
3.6958  
3.6954  
3.6950  
3.6946  
3.6942  
3.6938  
3.6934  
3.6930  
3.6926  
3.6922  
3.6918  
3.6914  
3.6910  
3.6906  
3.6902  
3.6898  
3.6894  
3.6890  
3.6886  
3.6882  
3.6878  
3.6874  
3.6870  
3.6866  
3.6862  
3.6858  
3.6854  
3.6850  
3.6846  
3.6842  
3.6838  
3.6834  
3.6830  
3.6826  
3.6822  
3.6818  
3.6814  
3.6810  
3.6806  
3.6802  
3.6798  
3.6794  
3.6790  
3.6786  
3.6782  
3.6778  
3.6774  
3.6770  
3.6766  
3.6762  
3.6758  
3.6754  
3.6750  
3.6746  
3.6742  
3.6738  
3.6734  
3.6730  
3.6726  
3.6722  
3.6718  
3.6714  
3.6710  
3.6706  
3.6702  
3.6698  
3.6694  
3.6690  
3.6686  
3.6682  
3.6678  
3.6674  
3.6670  
3.6666  
3.6662  
3.6658  
3.6654  
3.6650  
3.6646  
3.6642  
3.6638  
3.6634  
3.6630  
3.6626  
3.6622  
3.6618  
3.6614  
3.6610  
3.6606  
3.6602  
3.6598  
3.6594  
3.6590  
3.6586  
3.6582  
3.6578  
3.6574  
3.6570  
3.6566  
3.6562  
3.6558  
3.6554  
3.6550  
3.6546  
3.6542  
3.6538  
3.6534  
3.6530  
3.6526  
3.6522  
3.6518  
3.6514  
3.6510  
3.6506  
3.6502  
3.6498  
3.6494  
3.6490  
3.6486  
3.6482  
3.6478  
3.6474  
3.6470  
3.6466  
3.6462  
3.6458  
3.6454  
3.6450  
3.6446  
3.6442  
3.6438  
3.6434  
3.6430  
3.6426  
3.6422  
3.6418  
3.6414  
3.6410  
3.6406  
3.6402  
3.6398  
3.6394  
3.6390  
3.6386  
3.6382  
3.6378  
3.6374  
3.6370  
3.6366  
3.6362  
3.6358  
3.6354  
3.6350  
3.6346  
3.6342  
3.6338  
3.6334  
3.6330  
3.6326  
3.6322  
3.6318  
3.6314  
3.6310  
3.6306  
3.6302  
3.6298  
3.6294  
3.6290  
3.6286  
3.6282  
3.6278  
3.6274  
3.6270  
3.6266  
3.6262  
3.6258  
3.6254  
3.6250  
3.6246  
3.6242  
3.6238  
3.6234  
3.6230  
3.6226  
3.6222  
3.6218  
3.6214  
3.6210  
3.6206  
3.6202  
3.6198  
3.6194  
3.6190  
3.6186  
3.6182  
3.6178  
3.6174  
3.6170  
3.6166  
3.6162  
3.6158  
3.6154  
3.6150  
3.6146  
3.6142  
3.6138  
3.6134  
3.6130  
3.6126  
3.6122  
3.6118  
3.6114  
3.6110  
3.6106  
3.6102  
3.6098  
3.6094  
3.6090  
3.6086  
3.6082  
3.6078  
3.6074  
3.6070  
3.6066  
3.6062  
3.6058  
3.6054  
3.6050  
3.6046  
3.6042  
3.6038  
3.6034  
3.6030  
3.6026  
3.6022  
3.6018  
3.6014  
3.6010  
3.6006  
3.6002  
3.5998  
3.5994  
3.5990  
3.5986  
3.5982  
3.5978  
3.5974  
3.5970  
3.5966  
3.5962  
3.5958  
3.5954  
3.5950  
3.5946  
3.5942  
3.5938  
3.5934  
3.5930  
3.5926  
3.5922  
3.5918  
3.5914  
3.5910  
3.5906  
3.5902  
3.5898  
3.5894  
3.5890  
3.5886  
3.5882  
3.5878  
3.5874  
3.5870  
3.5866  
3.5862  
3.5858  
3.5854  
3.5850  
3.5846  
3.5842  
3.5838  
3.5834  
3.5830  
3.5826  
3.5822  
3.5818  
3.5814  
3.5810  
3.5806  
3.5802  
3.5798  
3.5794  
3.5790  
3.5786  
3.5782  
3.5778  
3.5774  
3.5770  
3.5766  
3.5762  
3.5758  
3.5754  
3.5750  
3.5746  
3.5742  
3.5738  
3.5734  
3.5730  
3.5726  
3.5722  
3.5718  
3.5714  
3.5710  
3.5706  
3.5702  
3.5698  
3.5694  
3.5690  
3.5686  
3.5682  
3.5678  
3.5674  
3.5670  
3.5666  
3.5662  
3.5658  
3.5654  
3.5650  
3.5646  
3.5642  
3.5638  
3.5634  
3.5630  
3.5626  
3.5622  
3.5618  
3.5614  
3.5610  
3.5606  
3.5602  
3.5598  
3.5594  
3.5590  
3.5586  
3.5582  
3.5578  
3.5574  
3.5570  
3.5566  
3.5562  
3.5558  
3.5554  
3.5550  
3.5546  
3.5542  
3.5538  
3.5534  
3.5530  
3.5526  
3.5522  
3.5518  
3.5514  
3.5510  
3.5506  
3.5502  
3.5498  
3.5494  
3.5490  
3.5486  
3.5482  
3.5478  
3.5474  
3.5470  
3.5466  
3.5462  
3.5458  
3.5454  
3.5450  
3.5446  
3.5442  
3.5438  
3.5434  
3.5430  
3.5426  
3.5422  
3.5418  
3.5414  
3.5410  
3.5406  
3.5402  
3.5398  
3.5394  
3.5390  
3.5386  
3.5382  
3.5378  
3.5374  
3.5370  
3.5366  
3.5362  
3.5358  
3.5354  
3.5350  
3.5346  
3.5342  
3.5338  
3.5334  
3.5330  
3.5326  
3.5322  
3.5318  
3.5314  
3.5310  
3.5306  
3.5302  
3.5298  
3.5294  
3.5290  
3.5286  
3.5282  
3.5278  
3.5274  
3.5270  
3.5266  
3.5262  
3.5258  
3.5254  
3.5250  
3.5246  
3.5242  
3.5238  
3.5234  
3.5230  
3.5226  
3.5222  
3.5218  
3.5214  
3.5210  
3.5206  
3.5202  
3.5198  
3.5194  
3.5190  
3.5186  
3.5182  
3.5178  
3.5174  
3.5170  
3.5166  
3.5162  
3.5158  
3.5154  
3.5150  
3.5146  
3.5142  
3.5138  
3.5134  
3.5130  
3.5126  
3.5122  
3.5118  
3.5114  
3.5110  
3.5106  
3.5102  
3.5098  
3.5094  
3.5090  
3.5086  
3.5082  
3.5078  
3.5074  
3.5070  
3.5066  
3.5062  
3.5058  
3.5054  
3.5050  
3.5046  
3.5042  
3.5038  
3.5034  
3.5030  
3.5026  
3.5022  
3.5018  
3.5014  
3.5010  
3.5006  
3.5002  
3.4998  
3.4994  
3.4990  
3.4986  
3.4982  
3.4978  
3.4974  
3.4970  
3.4966  
3.4962  
3.4958  
3.4954  
3.4950  
3.4946  
3.4942  
3.4938  
3.4934  
3.4930  
3.4926  
3.4922  
3.4918  
3.4914  
3.4910  
3.4906  
3.4902  
3.4898  
3.4894  
3.4890  
3.4886  
3.4882  
3.4878  
3.4874  
3.4870  
3.4866  
3.4862  
3.4858  
3.4854  
3.4850  
3.4846  
3.4842  
3.4838  
3.4834  
3.4830  
3.4826  
3.4822  
3.4818  
3.4814  
3.4810  
3.4806  
3.4802  
3.4798  
3.4794  
3.4790  
3.4786  
3.4782  
3.4778  
3.4774  
3.4770  
3.4766  
3.4762  
3.4758  
3.4754  
3.4750  
3.4746  
3.4742  
3.4738  
3.4734  
3.4730  
3.4726  
3.4722  
3.4718  
3.4714  
3.4710  
3.4706  
3.4702  
3.4698  
3.4694  
3.4690  
3.4686  
3.4682  
3.4678  
3.4674  
3.4670  
3.4666  
3.4662  
3.4658  
3.4654  
3.4650  
3.4646  
3.4642  
3.4638  
3.4634  
3.4630  
3.4626  
3.4622  
3.4618  
3.4614  
3.4610  
3.4606  
3.4602  
3.4598  
3.4594  
3.4590  
3.4586  
3.4582  
3.4578  
3.4574  
3.4570  
3.4566  
3.4562  
3.4558  
3.4554  
3.4550  
3.4546  
3.4542  
3.4538  
3.4534  
3.4530  
3.4526  
3.4522  
3.4518  
3.4514  
3.4510  
3.4506  
3.4502  
3.4498  
3.4494  
3.4490  
3.4486  
3.4482  
3.4478  
3.4474  
3.4470  
3.4466  
3.4462  
3.4458  
3.4454  
3.4450  
3.4446  
3.4442  
3.4438  
3.4434  
3.4430  
3.4426  
3.4422  
3.4418  
3.4414  
3.4410  
3.4406  
3.4402  
3.4398  
3.4394  
3.4390  
3.4386  
3.4382  
3.4378  
3.4374  
3.4370  
3.4366  
3.4362  
3.4358  
3.4354  
3.4350  
3.4346  
3.4342  
3.4338  
3.4334  
3.4330  
3.4326  
3.4322  
3.4318  
3.4314  
3.4310  
3.4306  
3.4302  
3.4298  
3.4294  
3.4290  
3.4286  
3.4282  
3.4278  
3.4274  
3.4270  
3.4266  
3.4262  
3.4258  
3.4254  
3.4250  
3.4246  
3.4242  
3.4238  
3.4234  
3.4230  
3.4226  
3.4222  
3.4218  
3.4214  
3.4210  
3.4206  
3.4202  
3.4198  
3.4194  
3.4190  
3.4186  
3.4182  
3.4178  
3.4174  
3.4170  
3.4166  
3.4162  
3.4158  
3.4154  
3.4150  
3.4146  
3.4142  
3.4138  
3.4134  
3.4130  
3.4126  
3.4122  
3.4118  
3.4114  
3.4110  
3.4106  
3.4102  
3.4098  
3.4094  
3.4090  
3.4086  
3.4082  
3.4078  
3.4074  
3.4070  
3.4066  
3.4062  
3.4058  
3.4054  
3.4050  
3.4046  
3.4042  
3.4038  
3.4034  
3.4030  
3.4026  
3.4022  
3.4018  
3.4014  
3.4010  
3.4006  
3.4002  
3.3998  
3.3994  
3.3990  
3.3986  
3.3982  
3.3978  
3.3974  
3.3970  
3.3966  
3.3962  
3.3958  
3.3954  
3.3950  
3.3946  
3.3942  
3.3938  
3.3934  
3.3930  
3.3926  
3.3922  
3.3918  
3.3914  
3.3910  
3.3906  
3.3902  
3.3898  
3.3894  
3.3890  
3.3886  
3.3882  
3.3878  
3.3874  
3.3870  
3.3866  
3.3862  
3.3858  
3.3854  
3.3850  
3.3846  
3.3842  
3.3838  
3.3834  
3.3830  
3.3826  
3.3822  
3.3

DY20210427-NMR-03ZL-0426.2.f1d

176.86  
168.88  
164.94  
158.01

104.35  
57.08  
55.31  
52.52

57.11  
55.45

34.76

14.83

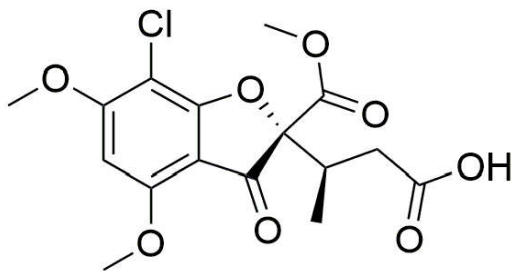

9

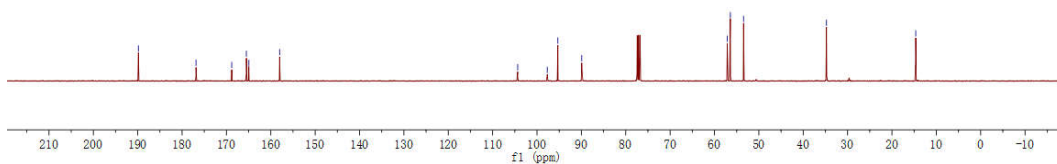

<sup>13</sup>C NMR spectrum of 9 (100 MHz, CDCl<sub>3</sub>)

DY20210518-NMR-02ZL051701.1.f1d

6.0871  
4.0633  
4.0543  
4.0453  
4.0432  
4.0255  
4.0185  
4.0094  
3.9983  
3.9893  
3.9531  
3.9400  
3.9290  
3.9183  
3.8983  
3.8873  
3.8271  
3.8144  
3.8034  
3.7834  
3.7724  
3.7524  
3.7414  
3.7214  
3.7104  
3.6904  
3.6794  
3.6594  
3.6484  
3.6284  
3.6174  
3.5974  
3.5864  
3.5664  
3.5554  
3.5354  
3.5244  
3.5044  
3.4934  
3.4734  
3.4624  
3.4424  
3.4314  
3.4114  
3.4004  
3.3804  
3.3694  
3.3494  
3.3384  
3.3184  
3.3074  
3.2874  
3.2764  
3.2564  
3.2454  
3.2254  
3.2144  
3.1944  
3.1834  
3.1634  
3.1524  
3.1324  
3.1214  
3.1014  
3.0904  
3.0704  
3.0594  
3.0394  
3.0284  
3.0084  
2.9974  
2.9774  
2.9664  
2.9464  
2.9354  
2.9154  
2.9044  
2.8844  
2.8734  
2.8534  
2.8424  
2.8224  
2.8114  
2.7914  
2.7804  
2.7604  
2.7494  
2.7294  
2.7184  
2.6984  
2.6874  
2.6674  
2.6564  
2.6364  
2.6254  
2.6054  
2.5944  
2.5744  
2.5634  
2.5434  
2.5324  
2.5124  
2.5014  
2.4814  
2.4704  
2.4504  
2.4394  
2.4194  
2.4084  
2.3884  
2.3774  
2.3574  
2.3464  
2.3264  
2.3154  
2.2954  
2.2844  
2.2644  
2.2534  
2.2334  
2.2224  
2.2024  
2.1914  
2.1714  
2.1604  
2.1404  
2.1294  
2.1094  
2.0984  
2.0784  
2.0674  
2.0474  
2.0364  
2.0164  
2.0054  
1.9854  
1.9744  
1.9544  
1.9434  
1.9234  
1.9124  
1.8924  
1.8814  
1.8614  
1.8504  
1.8304  
1.8194  
1.7994  
1.7884  
1.7684  
1.7574  
1.7374  
1.7264  
1.7064  
1.6954  
1.6754  
1.6644  
1.6444  
1.6334  
1.6134  
1.6024  
1.5824  
1.5714  
1.5514  
1.5404  
1.5204  
1.5094  
1.4894  
1.4784  
1.4584  
1.4474  
1.4274  
1.4164  
1.3964  
1.3854  
1.3654  
1.3544  
1.3344  
1.3234  
1.3034  
1.2924  
1.2724  
1.2614  
1.2414  
1.2304  
1.2104  
1.1994  
1.1794  
1.1684  
1.1484  
1.1374  
1.1174  
1.1064  
1.0864  
1.0754  
1.0554  
1.0444  
1.0244  
1.0134  
0.9934  
0.9824  
0.9624  
0.9514  
0.9314  
0.9204  
0.9004  
0.8894  
0.8694  
0.8584  
0.8384  
0.8274  
0.8074  
0.7964  
0.7764  
0.7654  
0.7454  
0.7344  
0.7144  
0.7034  
0.6834  
0.6724  
0.6524  
0.6414  
0.6214  
0.6104  
0.5904  
0.5794  
0.5594  
0.5484  
0.5284  
0.5174  
0.4974  
0.4864  
0.4664  
0.4554  
0.4354  
0.4244  
0.4044  
0.3934  
0.3734  
0.3624  
0.3424  
0.3314  
0.3114  
0.3004  
0.2804  
0.2694  
0.2494  
0.2384  
0.2184  
0.2074  
0.1874  
0.1764  
0.1564  
0.1454  
0.1254  
0.1144  
0.0944  
0.0834  
0.0634  
0.0524  
0.0324  
0.0214  
0.0014

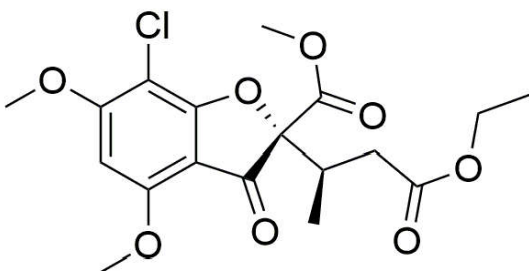

10a

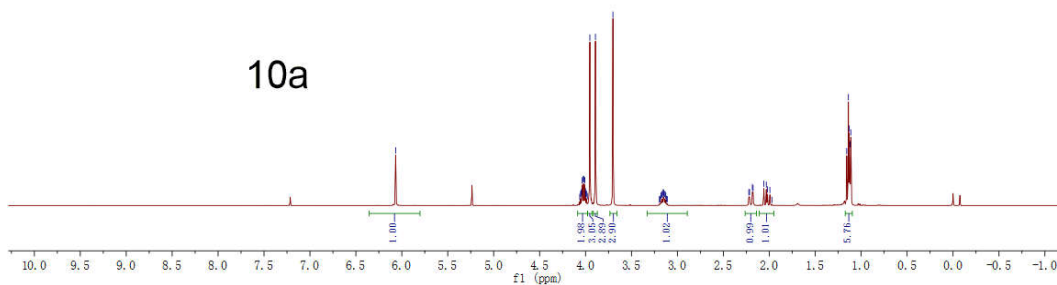

<sup>1</sup>H NMR spectrum of 10a (400 MHz, CDCl<sub>3</sub>)

DY20210518-NMR-02ZL051701.2.f1d

169.88  
171.23  
168.88  
164.83  
157.94

104.45  
97.78  
81.88

60.62  
57.08  
53.39

45.82  
36.82

14.08  
14.14

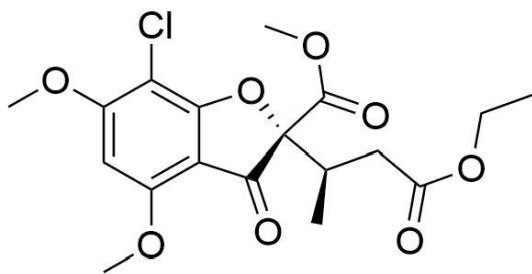

10a

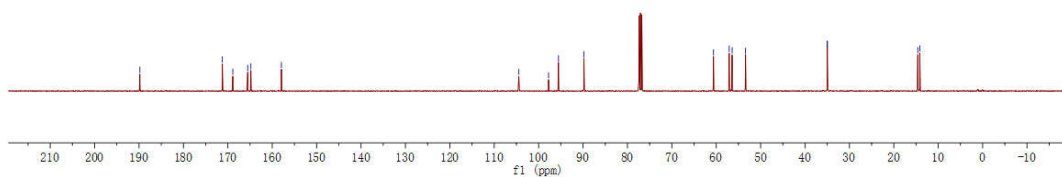

<sup>13</sup>C NMR spectrum of 10a (100 MHz, CDCl<sub>3</sub>)

DY20210518-NMR-02ZL051702.1.f1d

-8.1429

4.0275  
3.7936  
3.6230  
3.5807  
3.4165  
3.4043  
3.1782  
1.1580

2.3767  
2.3407  
2.2153  
2.1470  
2.1121

1.1884  
1.1885  
1.1824

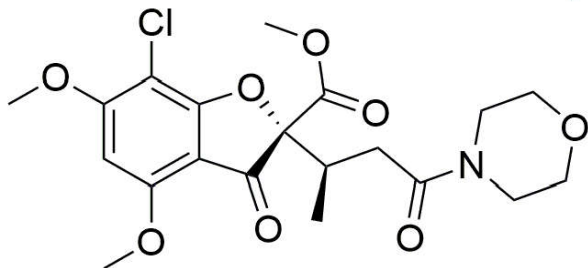

10b

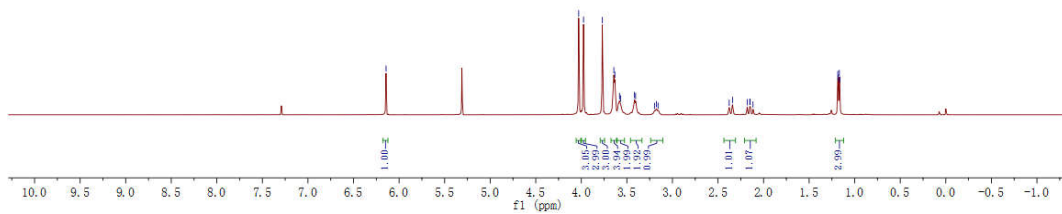

<sup>1</sup>H NMR spectrum of 10b (400 MHz, CDCl<sub>3</sub>)



20210526ZL052303-C\_1.tif

198.88  
168.95  
164.88  
157.91  
104.59  
97.52  
96.55  
88.77  
57.08  
56.43  
54.71  
53.42  
48.98  
41.55  
41.57  
35.87  
33.69  
14.36

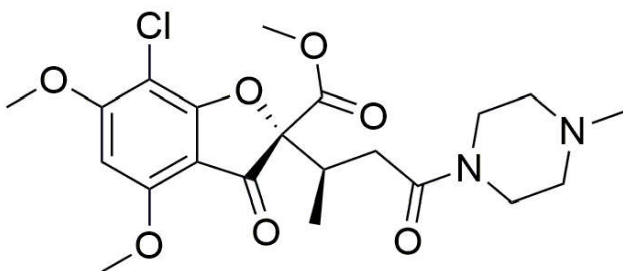

10c

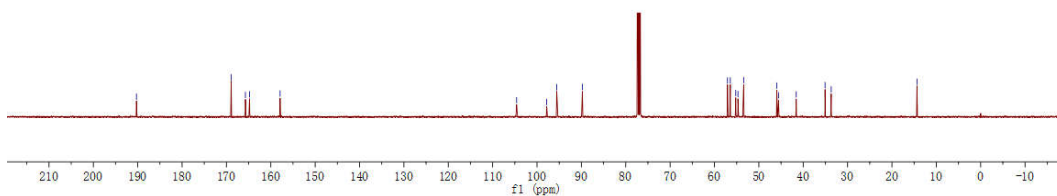

<sup>13</sup>C NMR spectrum of 10c (100 MHz, CDCl<sub>3</sub>)

DV20210518-NMR-02ZL051704\_1.f14

7.3846  
7.3500  
7.3512  
7.3512  
7.3379  
7.3374  
7.3196  
7.2995  
7.2951  
7.2835  
7.2754  
-6.0298  
5.1050  
5.1050  
5.0740  
5.0582  
5.0278  
5.0232  
3.9111  
3.8745  
3.8745  
3.8690  
3.8707  
3.8707  
3.8541  
3.8541  
3.8378  
2.3550  
2.3488  
2.3488  
2.3375  
2.3400  
2.3400  
2.3246  
2.3246  
1.8113  
1.8155  
1.8155  
1.3889  
1.3938  
1.3938  
1.1847  
1.1807

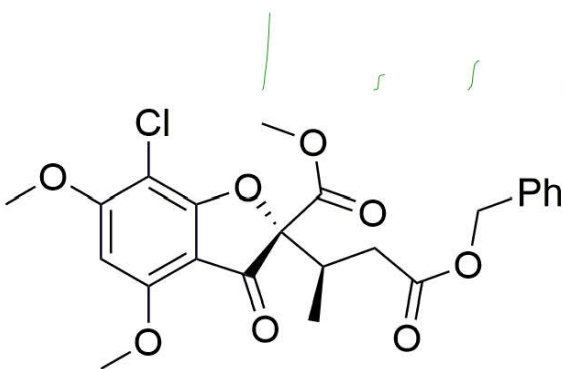

10d

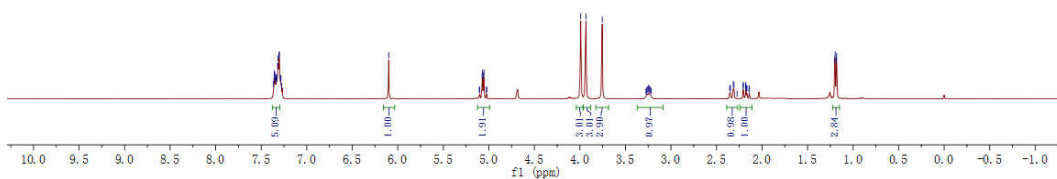

<sup>1</sup>H NMR spectrum of 10d (400 MHz, CDCl<sub>3</sub>)

DY20210518-NMR-02ZL051704. 2. f1d

171.11  
168.85  
164.82  
157.96

135.83  
128.25  
125.96

104.43  
97.23  
96.44  
89.83

86.52  
57.07  
53.42

34.98

14.04

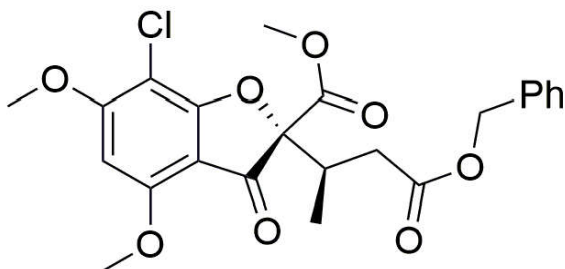

10d

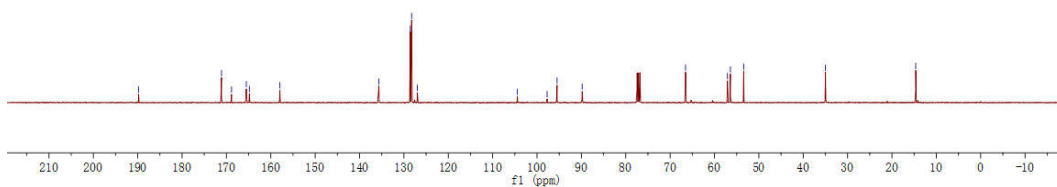

**<sup>13</sup>C NMR spectrum of 10d (100 MHz, CDCl<sub>3</sub>)**

DY20210518-NMR-02ZL051705. 1. f1d

-6.1482

185.92  
184.29  
182.98  
177.94  
175.10  
173.72  
172.91  
171.74  
169.07  
167.92  
167.85  
165.79  
165.58  
161.00  
159.94  
158.42  
154.97  
152.71  
150.85  
149.09  
147.26  
145.38  
143.55  
139.79  
138.81

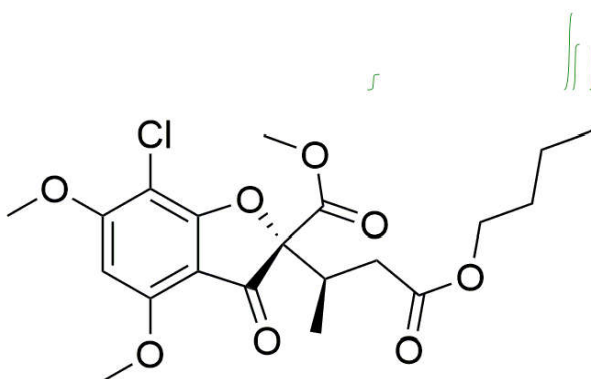

10e

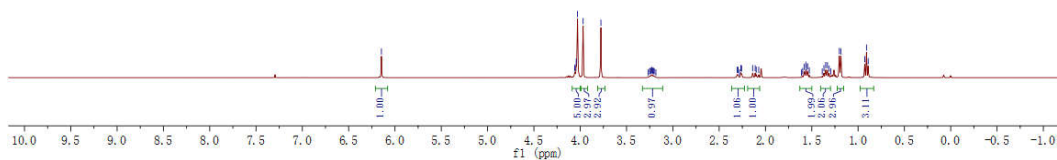

**<sup>1</sup>H NMR spectrum of 10e (400 MHz, CDCl<sub>3</sub>)**

DY20210518-NMR-02ZL051705.2.fid

189.89  
171.33  
168.87  
164.83  
157.94

104.45

97.79

95.55

89.88

64.55

57.87

55.38

34.95

34.94

30.53

19.87

13.66

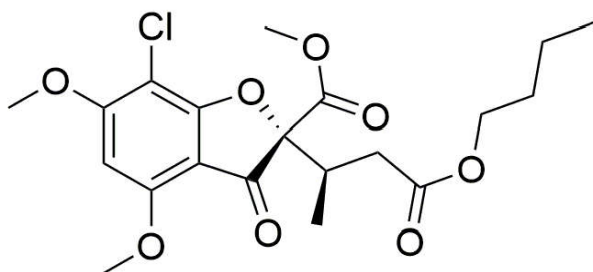

10e

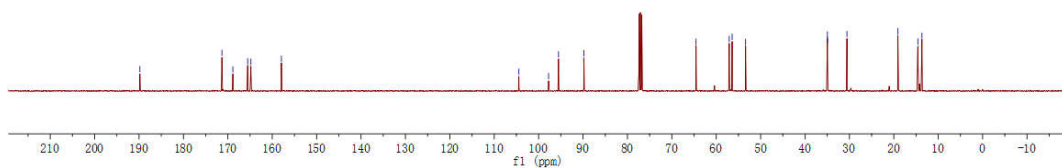

<sup>13</sup>C NMR spectrum of 10e (100 MHz, CDCl<sub>3</sub>)

20210526ZL052306.1.fid

6.1267

5.4694

5.4655

5.4722

4.0231

3.9832

3.7716

3.2562

3.2336

3.2077

3.1954

3.1884

3.1789

3.1676

3.1570

3.1462

3.1350

3.1240

3.1130

2.2197

2.1881

2.1780

1.9532

1.9095

1.8525

1.8450

1.8377

1.8305

1.8185

1.8066

1.7946

1.7826

1.7706

1.7586

1.7466

1.7346

1.7226

1.7106

1.6986

1.6866

1.6746

1.6626

1.6506

1.6386

1.6266

1.6146

1.6026

1.5906

1.5786

1.5666

1.5546

1.5426

1.5306

1.5186

1.5066

1.4946

1.4826

1.4706

1.4586

1.4466

1.4346

1.4226

1.4106

1.3986

1.3866

1.3746

1.3626

1.3506

1.3386

1.3266

1.3146

1.3026

1.2906

1.2786

1.2666

1.2546

1.2426

1.2306

1.2186

1.2066

1.1946

1.1826

1.1706

1.1586

1.1466

1.1346

1.1226

1.1106

1.0986

1.0866

1.0746

1.0626

1.0506

1.0386

1.0266

1.0146

1.0026

0.9906

0.9786

0.9666

0.9546

0.9426

0.9306

0.9186

0.9066

0.8946

0.8826

0.8706

0.8586

0.8466

0.8346

0.8226

0.8106

0.7986

0.7866

0.7746

0.7626

0.7506

0.7386

0.7266

0.7146

0.7026

0.6906

0.6786

0.6666

0.6546

0.6426

0.6306

0.6186

0.6066

0.5946

0.5826

0.5706

0.5586

0.5466

0.5346

0.5226

0.5106

0.4986

0.4866

0.4746

0.4626

0.4506

0.4386

0.4266

0.4146

0.4026

0.3906

0.3786

0.3666

0.3546

0.3426

0.3306

0.3186

0.3066

0.2946

0.2826

0.2706

0.2586

0.2466

0.2346

0.2226

0.2106

0.1986

0.1866

0.1746

0.1626

0.1506

0.1386

0.1266

0.1146

0.1026

0.0906

0.0786

0.0666

0.0546

0.0426

0.0306

0.0186

0.0066

0.0000

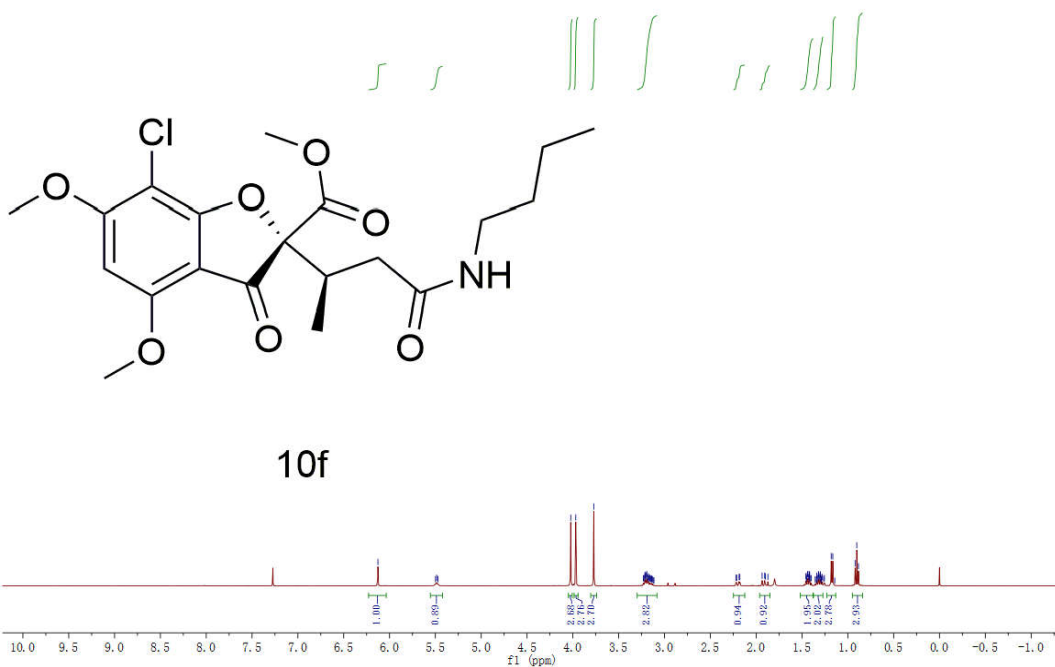

10f

<sup>1</sup>H NMR spectrum of 10f (400 MHz, CDCl<sub>3</sub>)



20210526ZL052306-C\_1qfid

170.97  
165.99  
163.86  
161.96  
157.91

104.99  
97.89  
95.55  
83.76

57.88  
55.42  
53.42

30.32  
27.89  
26.61  
24.61

20.03  
14.28  
13.12

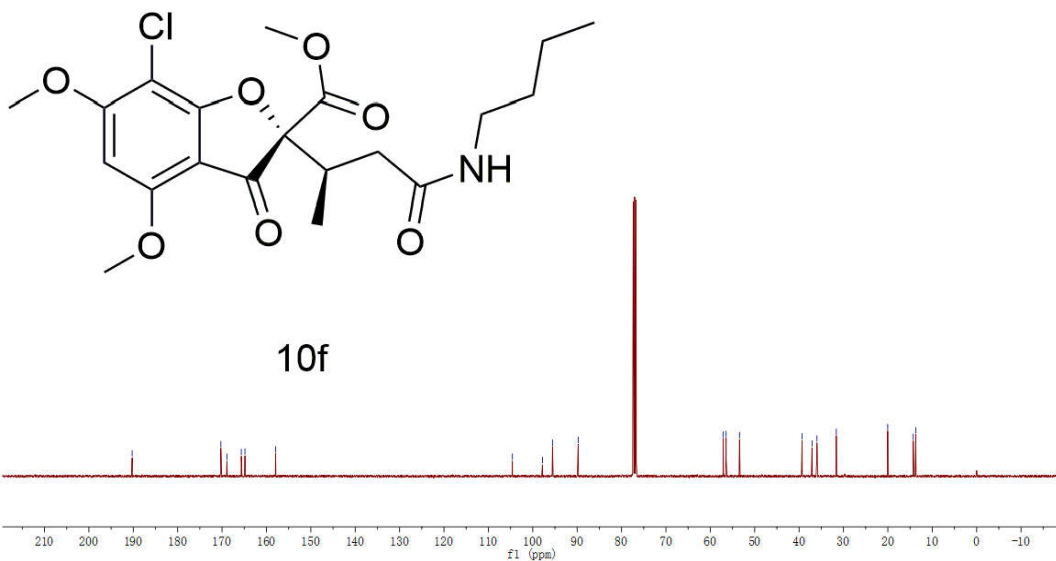

**<sup>13</sup>C NMR spectrum of 10f (100 MHz, CDCl<sub>3</sub>)**

20210526ZL052307\_1.fid

7.3004  
7.2870  
7.2845  
7.2695  
7.0758  
-6.1194

4.0197  
3.9669  
3.9351  
3.9110  
3.2588  
3.2547  
3.2536  
3.2522  
3.2514  
3.2415  
3.2401  
3.2386  
3.2377  
3.2197  
3.2109  
3.2082  
3.2075  
1.1211

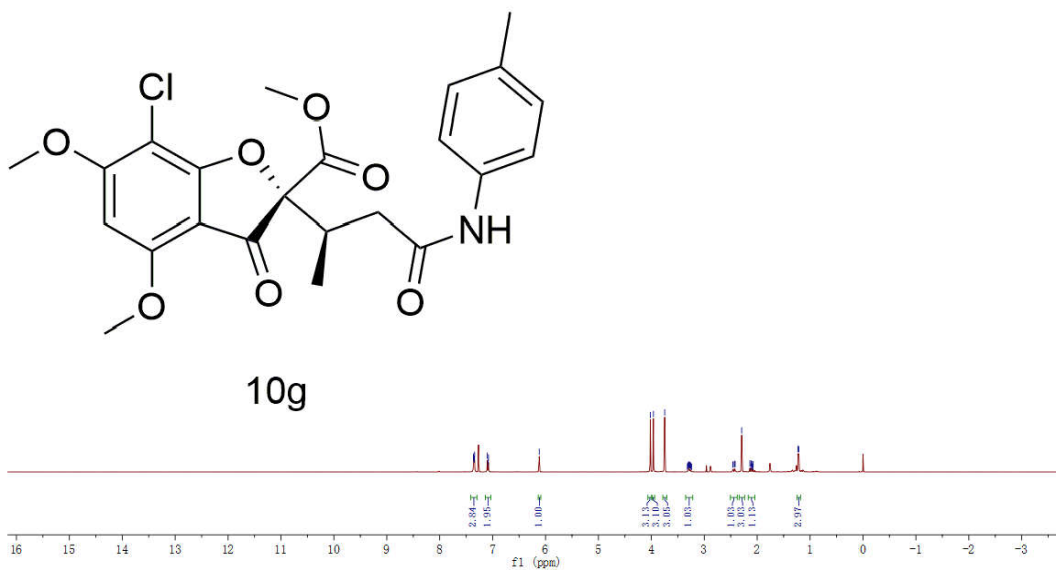

**<sup>1</sup>H NMR spectrum of 10g (400 MHz, CDCl<sub>3</sub>)**

20210526ZL052307-C\_1qf1d

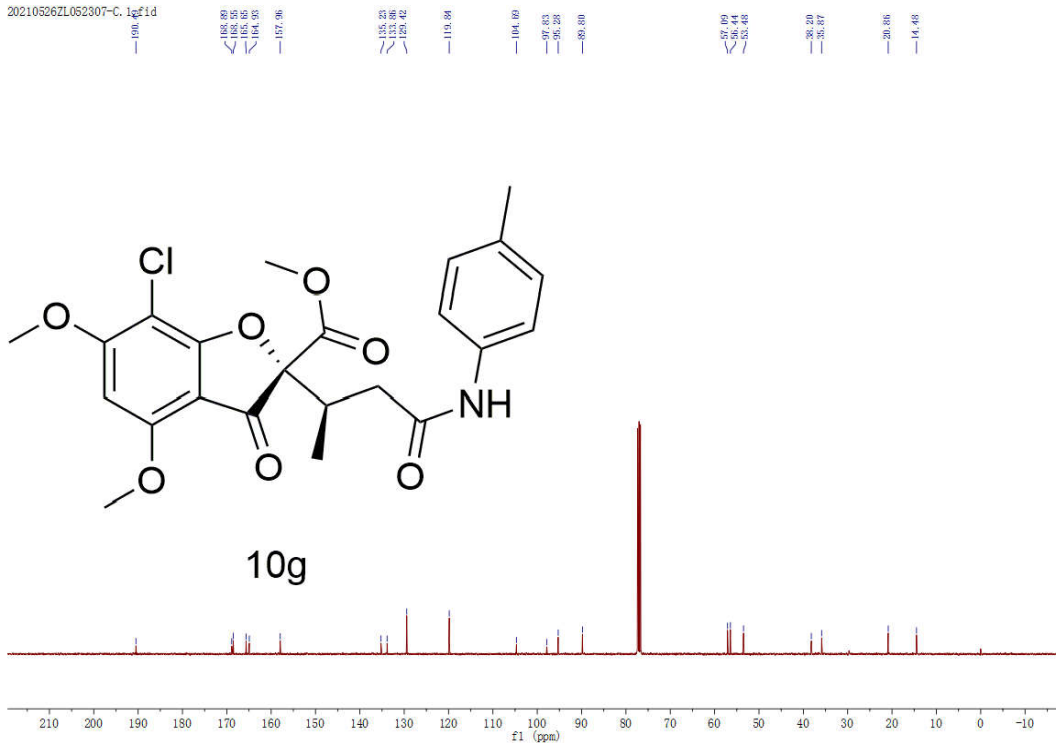

### <sup>13</sup>C NMR spectrum of 10g (100 MHz, CDCl<sub>3</sub>)

20210526ZL052308\_1qf1d

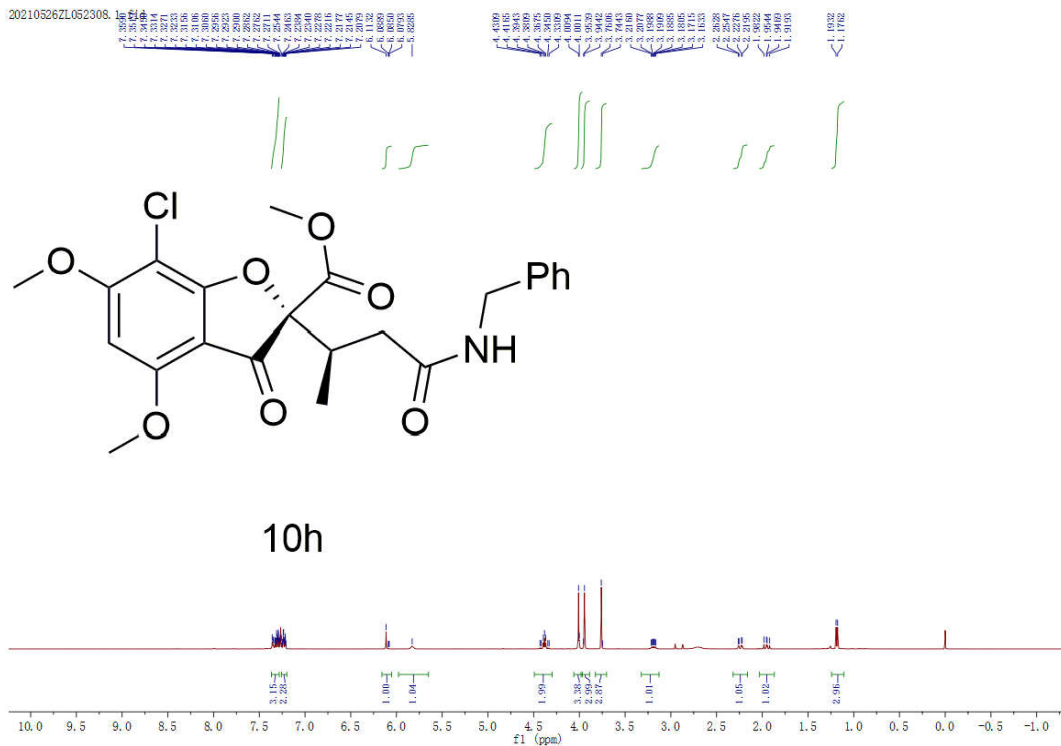

### <sup>1</sup>H NMR spectrum of 10h (400 MHz, CDCl<sub>3</sub>)

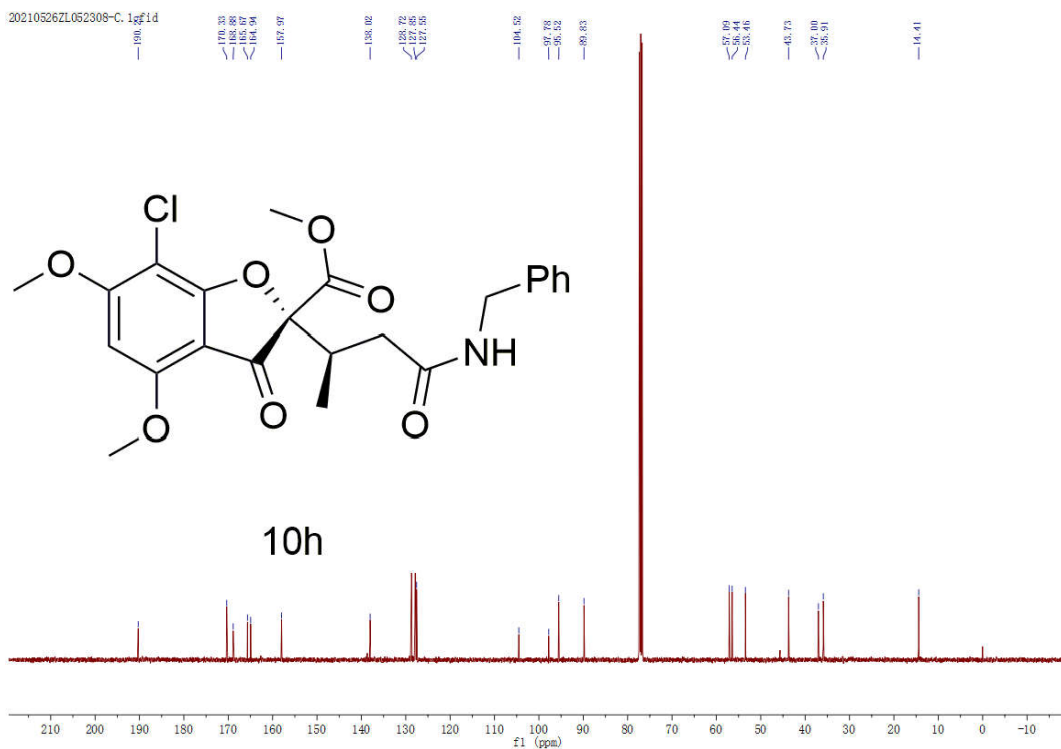

<sup>13</sup>C NMR spectrum of 10h (100 MHz, CDCl<sub>3</sub>)

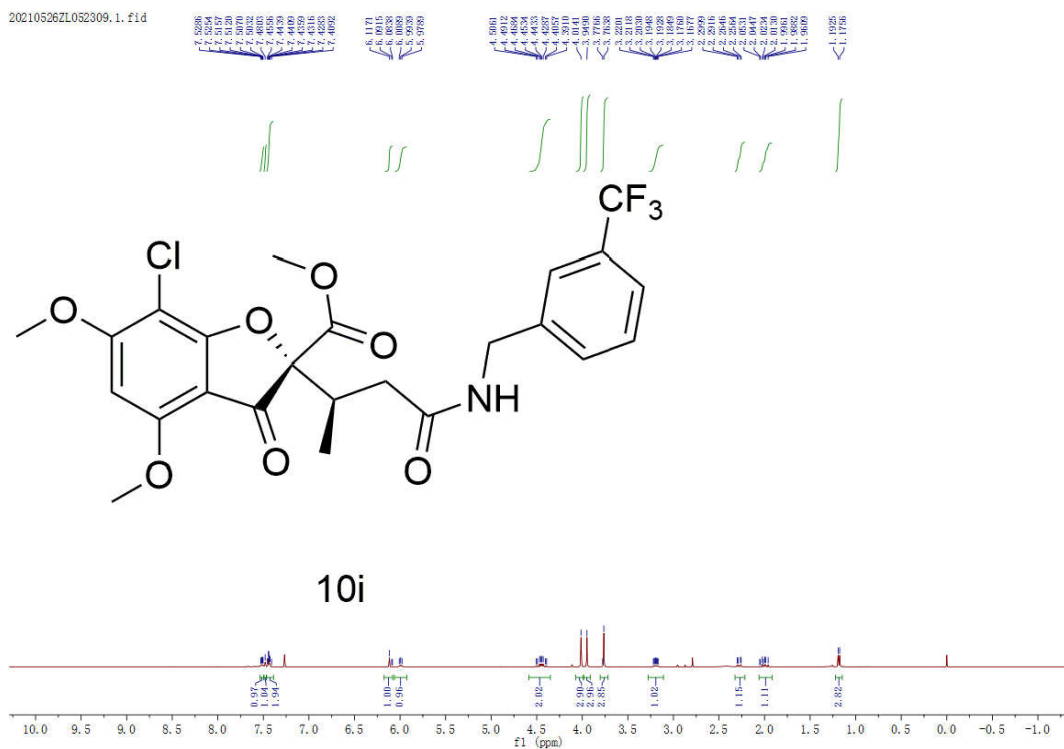

<sup>1</sup>H NMR spectrum of 10i (400 MHz, CDCl<sub>3</sub>)

20210526ZL052309-C\_1.f1d

170.95  
168.88  
164.96  
157.97  
139.23  
131.18  
129.17  
128.40  
128.35  
124.31  
104.52  
57.09  
56.44  
48.82  
37.09  
35.47  
-43.13  
-36.99  
-35.90  
-14.28

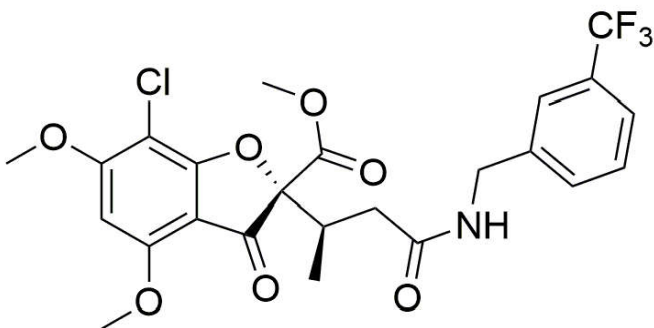

10i

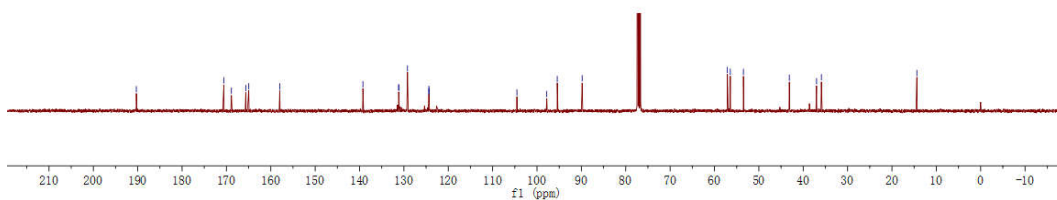

<sup>13</sup>C NMR spectrum of 10i (100 MHz, CDCl<sub>3</sub>)

20210526ZL052310.1.f1d

6.9794  
6.9663  
6.9455  
6.9347  
6.8710  
6.8540  
6.8485  
6.8393  
-8.1549  
4.0235  
3.9794  
3.9530  
3.9393  
3.9193  
3.9087  
3.8462  
3.8331  
3.8269  
3.8194  
2.5595  
2.5294  
2.5165  
2.4996  
2.4865  
2.4803  
1.3834  
1.2804

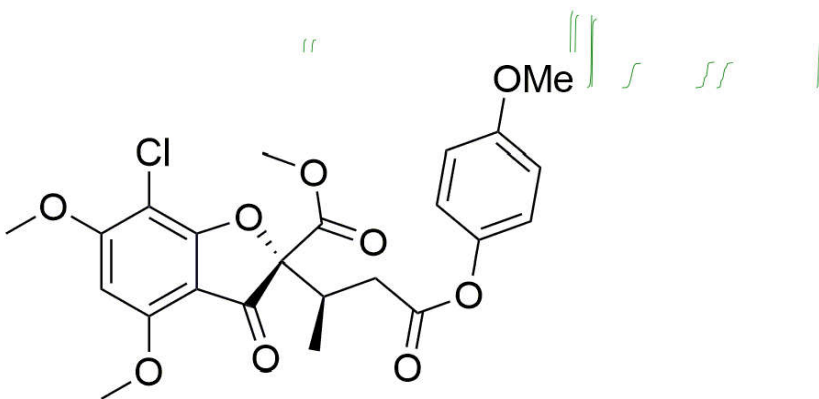

10j

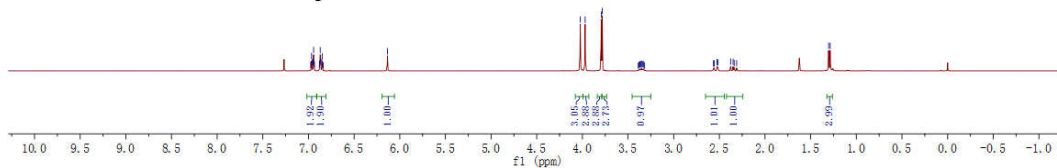

<sup>1</sup>H NMR spectrum of 10j (400 MHz, CDCl<sub>3</sub>)



20210526ZL052311C. 1. f1.d

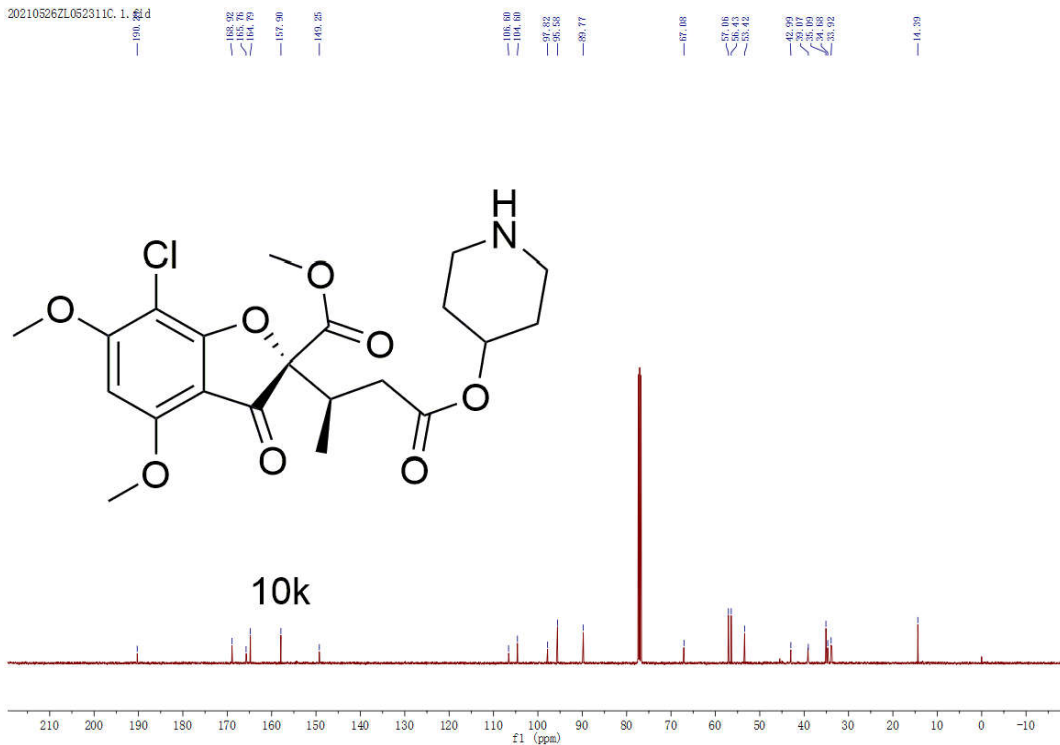

<sup>13</sup>C NMR spectrum of 10k (100 MHz, CDCl<sub>3</sub>)

20210526ZL052312. 1. f1.d

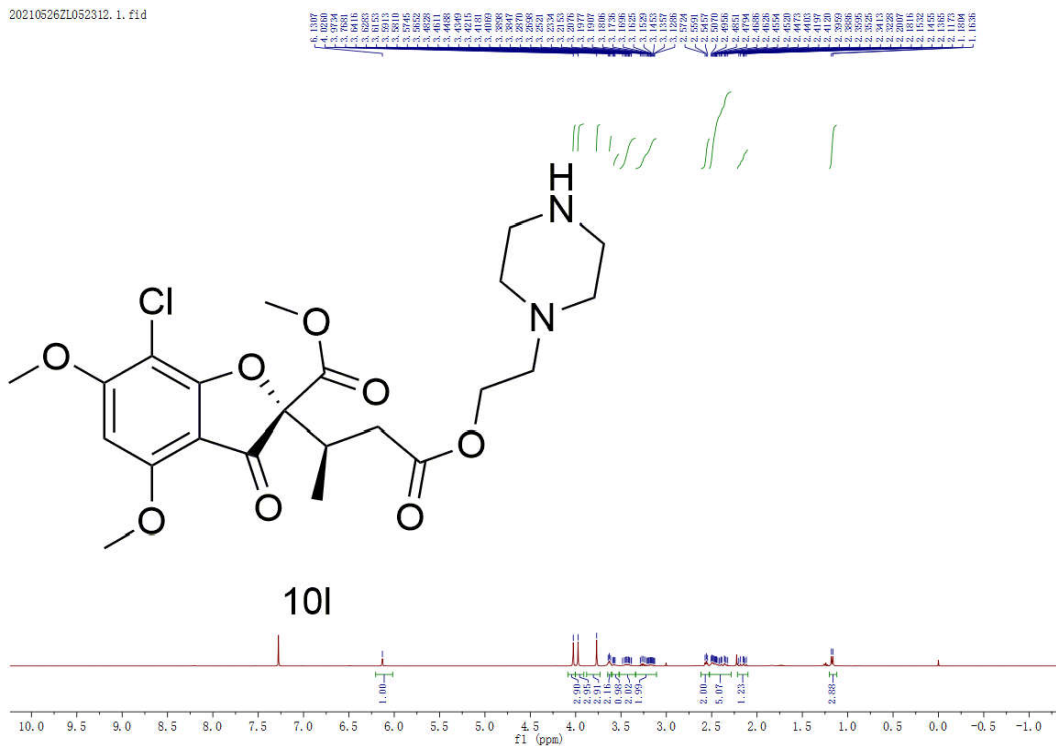

<sup>1</sup>H NMR spectrum of 10l (400 MHz, CDCl<sub>3</sub>)

20210526ZL052312-C\_1.mf1.d

198.06  
163.94  
155.71  
144.80  
157.90  
143.71  
104.80  
97.84  
95.53  
89.75  
59.25  
57.06  
55.43  
53.21  
52.00  
45.54  
41.73  
35.05  
33.72  
14.34

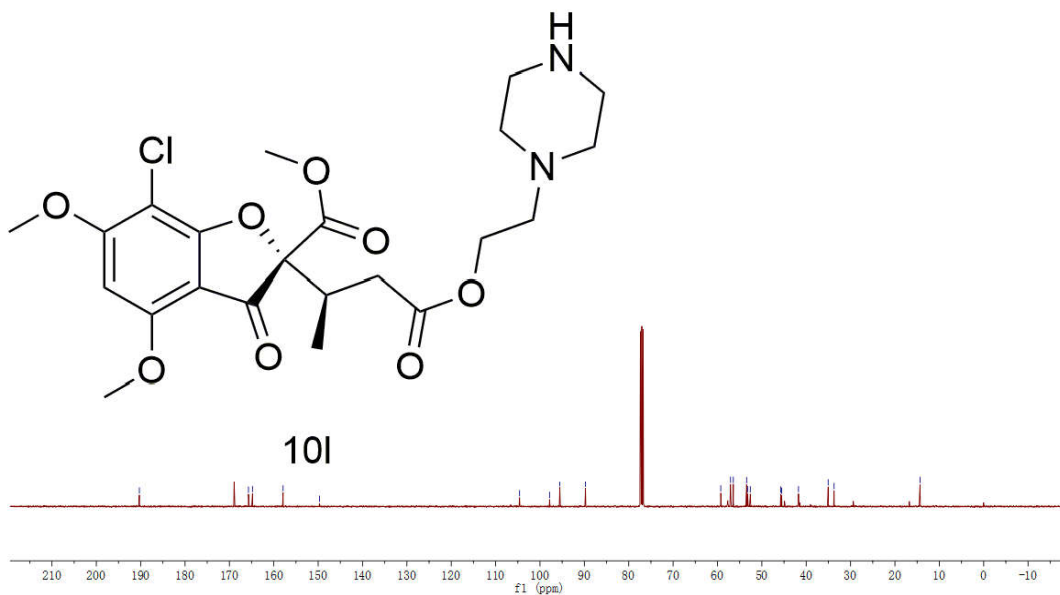

### <sup>13</sup>C NMR spectrum of 101 (100 MHz, CDCl<sub>3</sub>)

20210526ZL052501-1.fid

6.4458  
5.3172  
4.0655  
3.9852  
2.9882  
2.8182  
2.7705  
2.7105  
2.7537  
2.4622  
2.4548  
0.8528  
0.8386

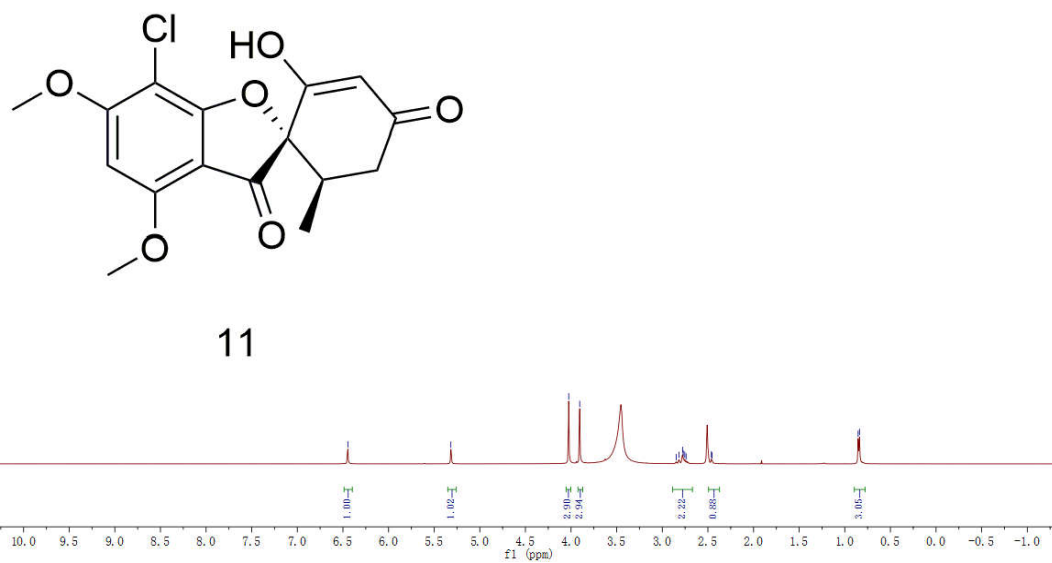

### <sup>1</sup>H NMR spectrum of 11 (400 MHz, DMSO-d<sub>6</sub>)

DY20201202-NMR-02ZL-1208, 1.fid

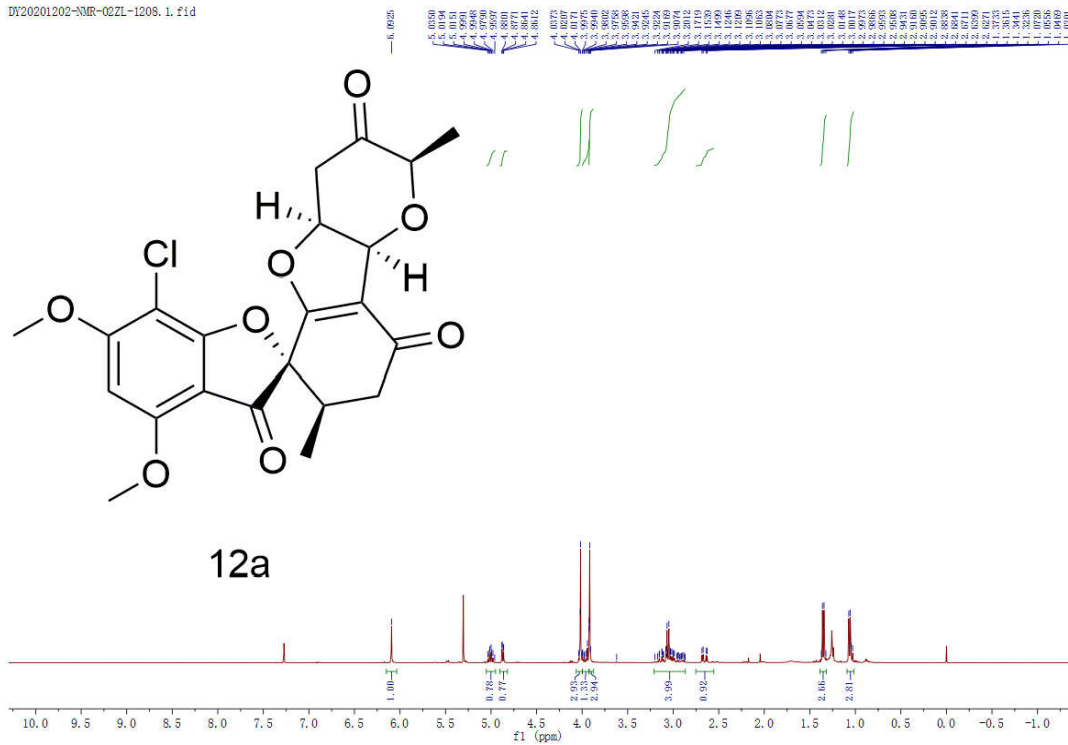

**<sup>1</sup>H NMR spectrum of 12a (400 MHz, CDCl<sub>3</sub>)**

DY20201209-NMR-01ZL-1208, 1.fid

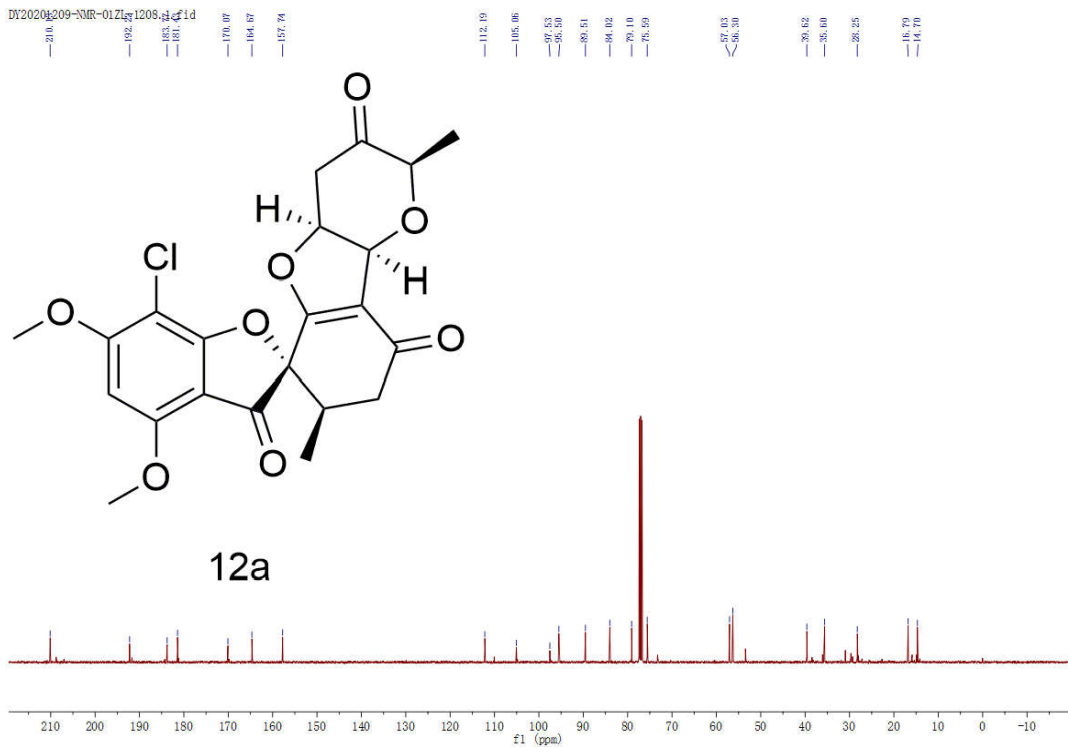

**<sup>13</sup>C NMR spectrum of 12a (100 MHz, CDCl<sub>3</sub>)**



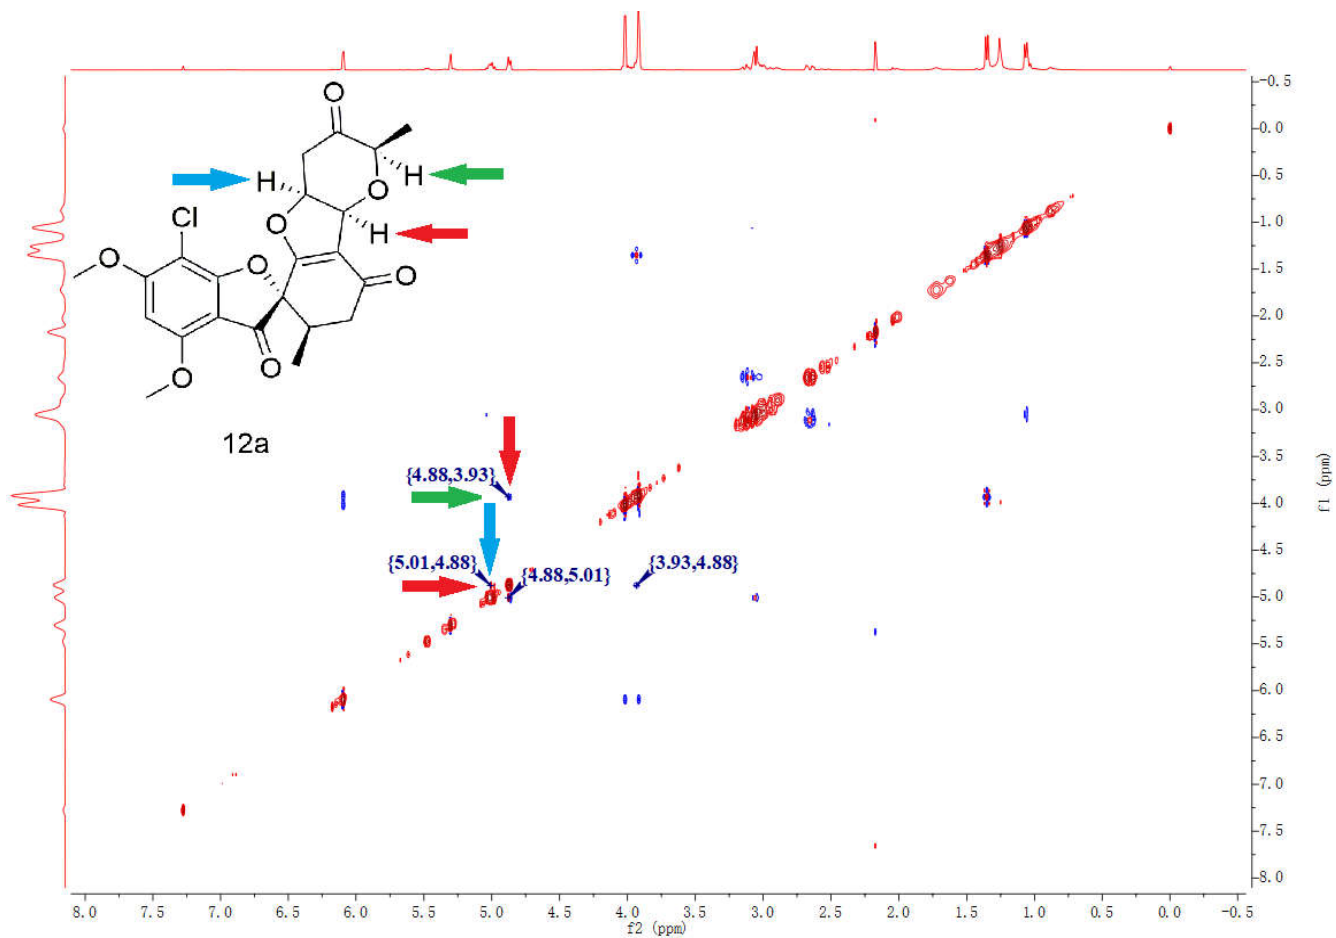

**$^1\text{H}$ - $^1\text{H}$  NOESY NMR spectrum of 12a (100 MHz,  $\text{CDCl}_3$ )**

DV20201215-NMR-01ZL-1213.1.fid

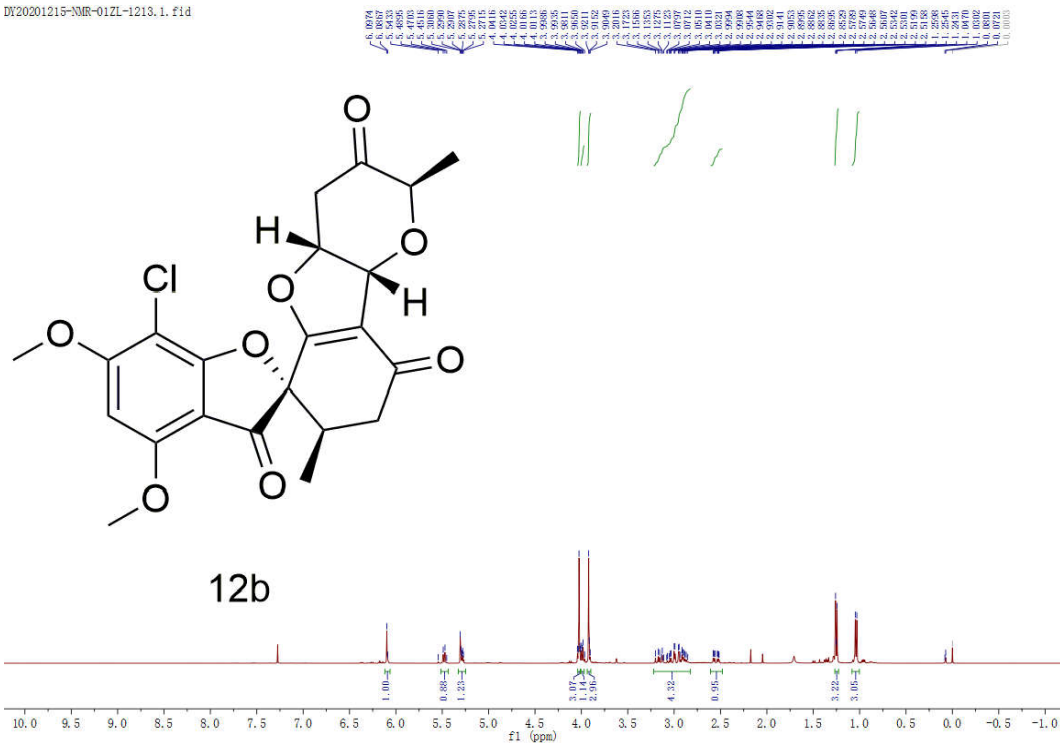

<sup>1</sup>H NMR spectrum of 12b (400 MHz, CDCl<sub>3</sub>)

DV20201215-NMR-04ZL-213.fid

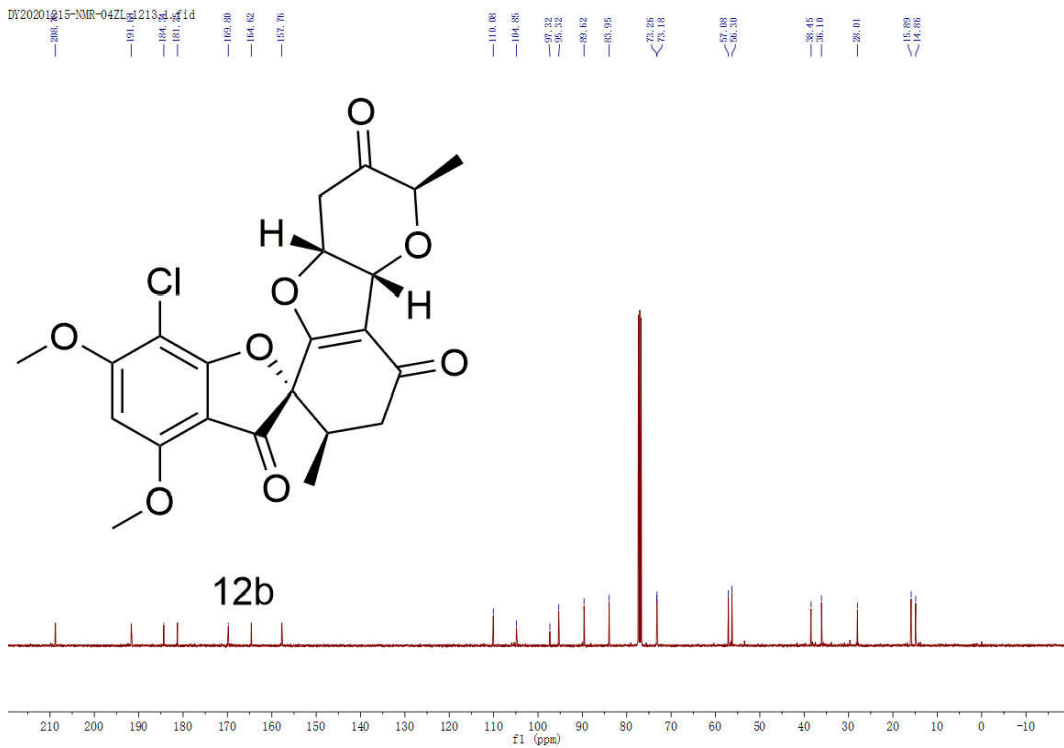

<sup>13</sup>C NMR spectrum of 12b (100 MHz, CDCl<sub>3</sub>)

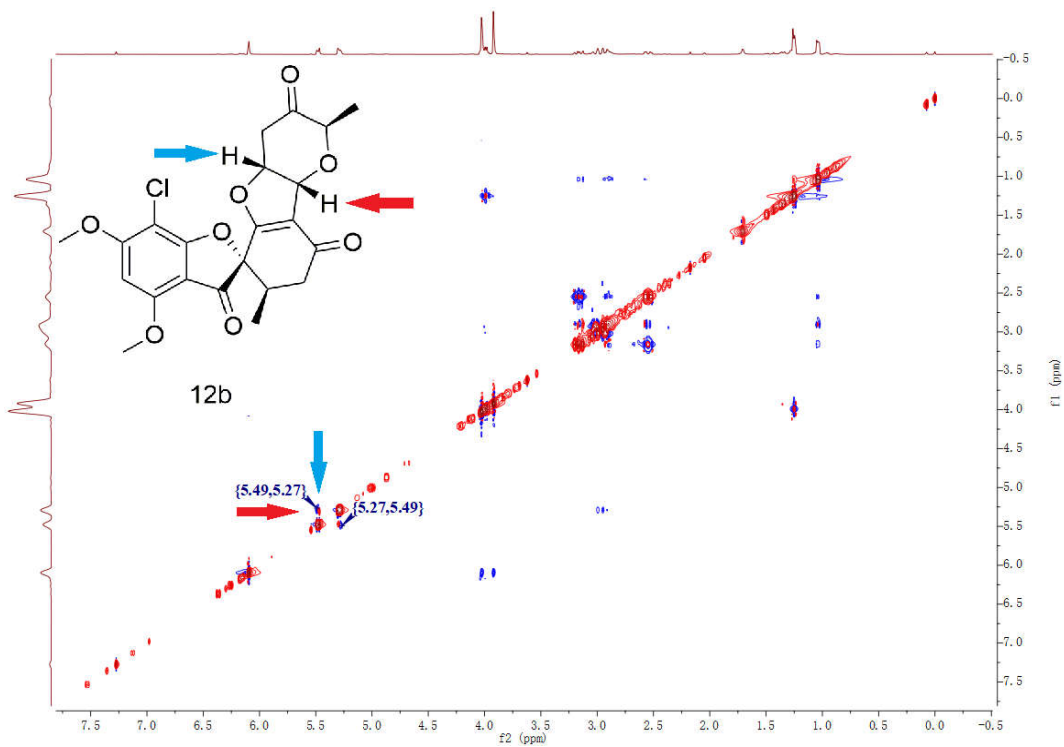

**$^1\text{H}$ - $^1\text{H}$  NOESY NMR spectrum of 12b (100 MHz,  $\text{CDCl}_3$ )**

DV20201229-NMR-01ZL-1225.1.fid

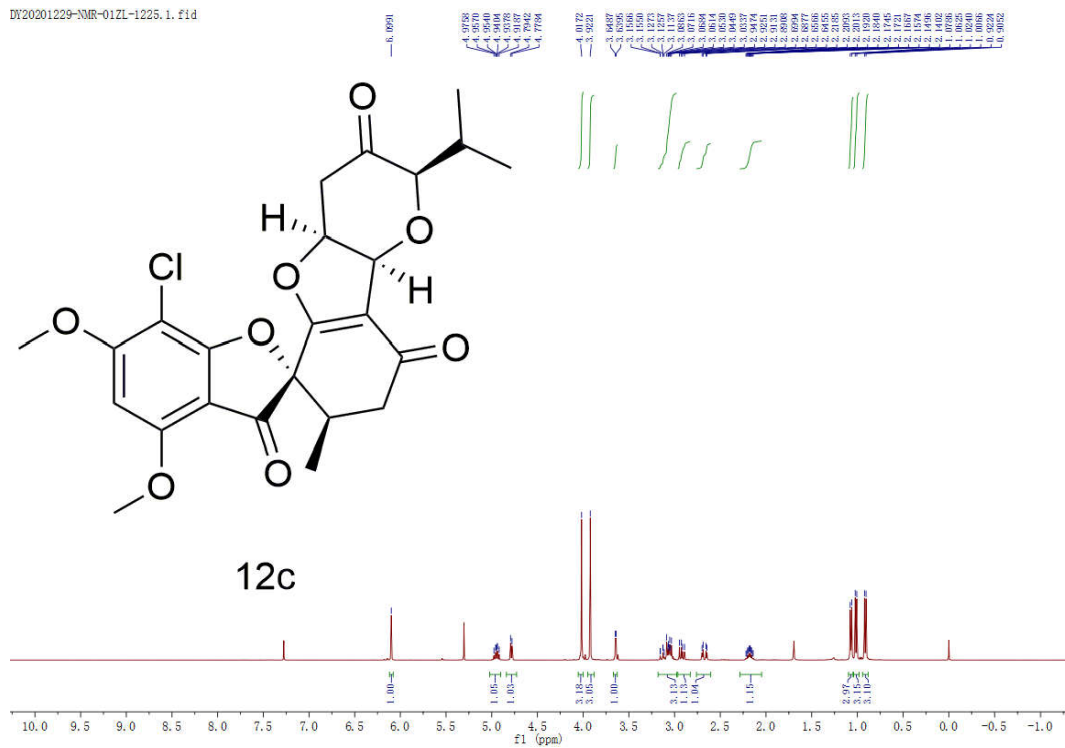

**$^1\text{H}$  NMR spectrum of 12c (400 MHz,  $\text{CDCl}_3$ )**

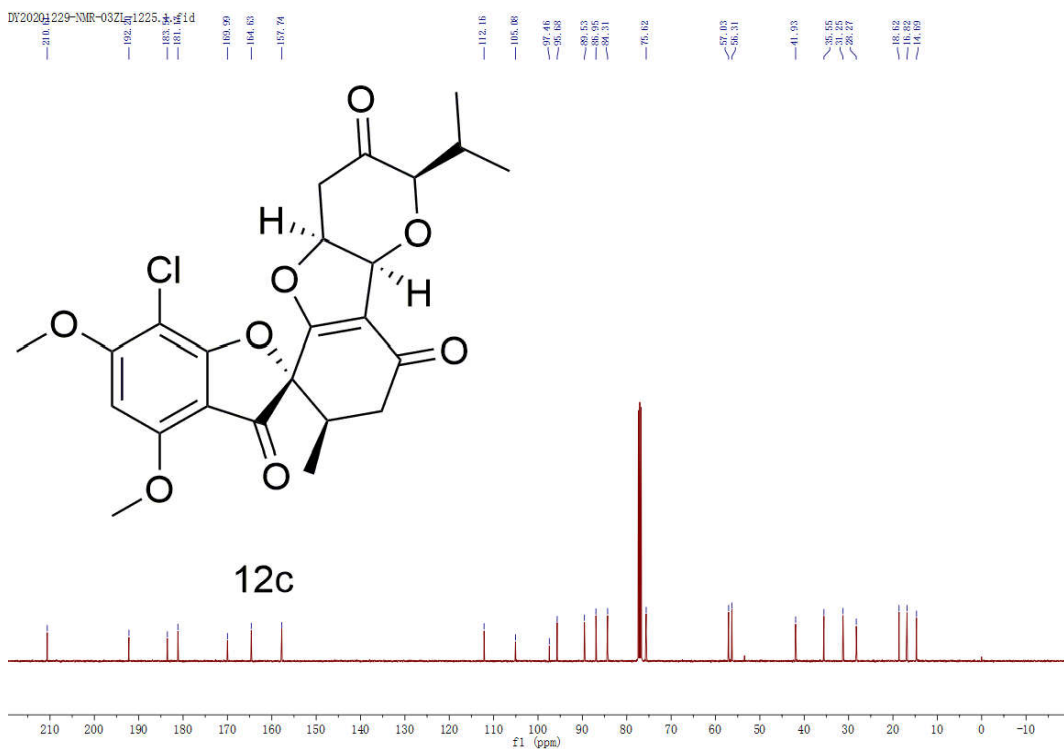

$^{13}\text{C}$  NMR spectrum of 12c (100 MHz,  $\text{CDCl}_3$ )

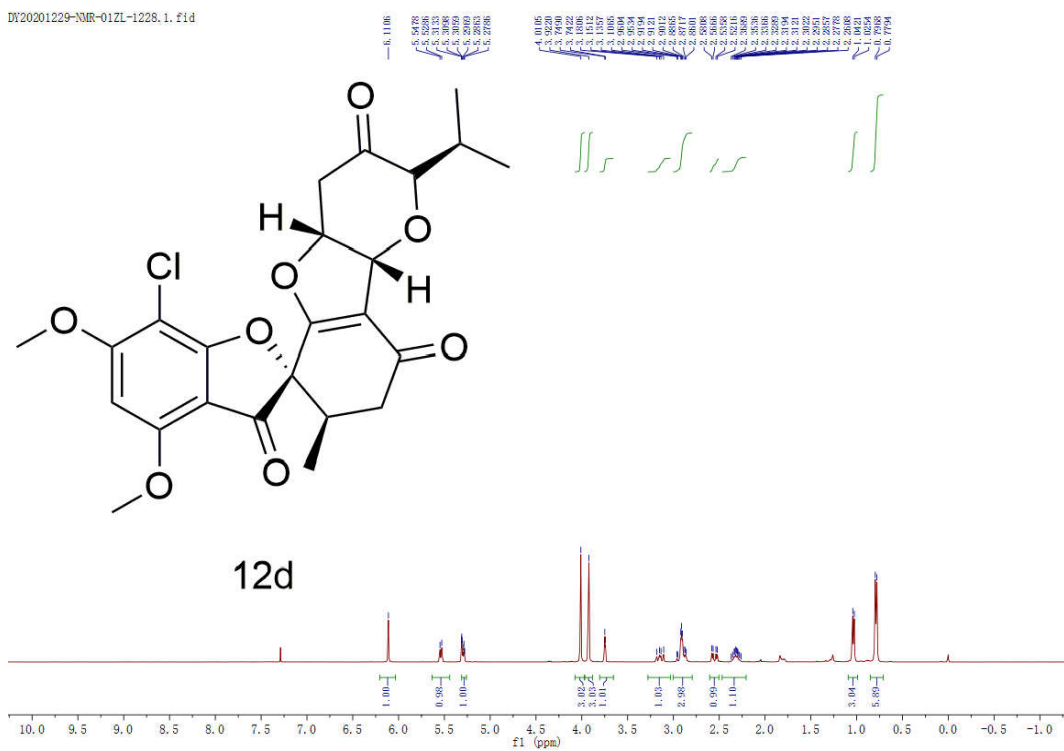

$^1\text{H}$  NMR spectrum of 12d (400 MHz,  $\text{CDCl}_3$ )

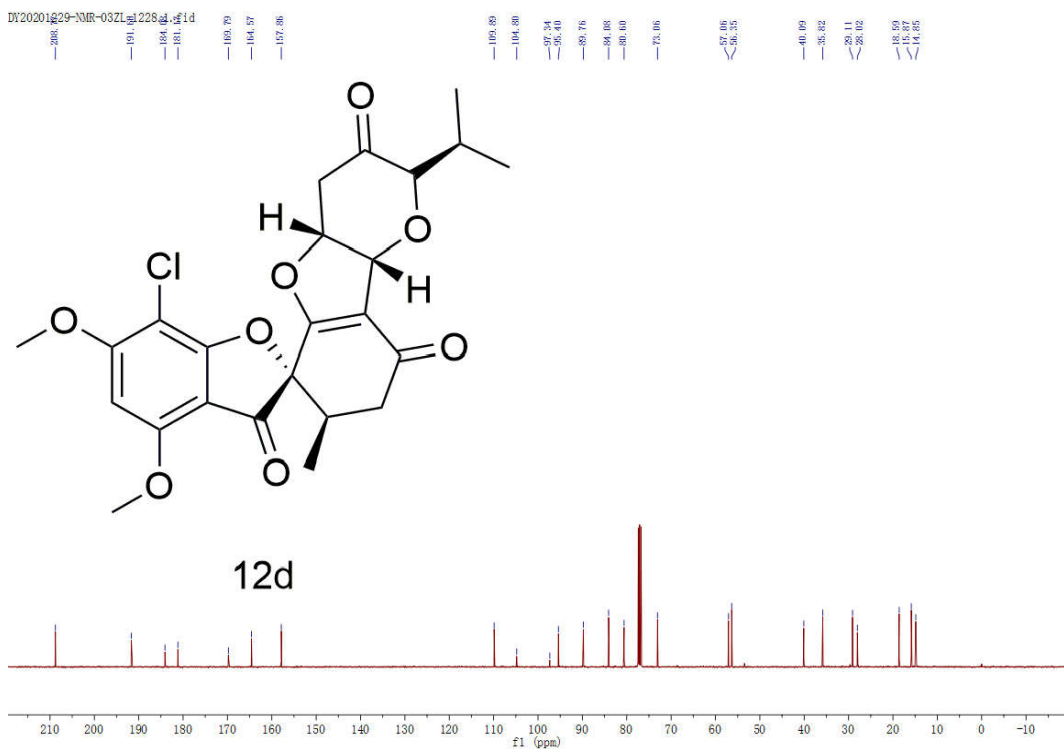

$^{13}\text{C}$  NMR spectrum of 12d (100 MHz,  $\text{CDCl}_3$ )

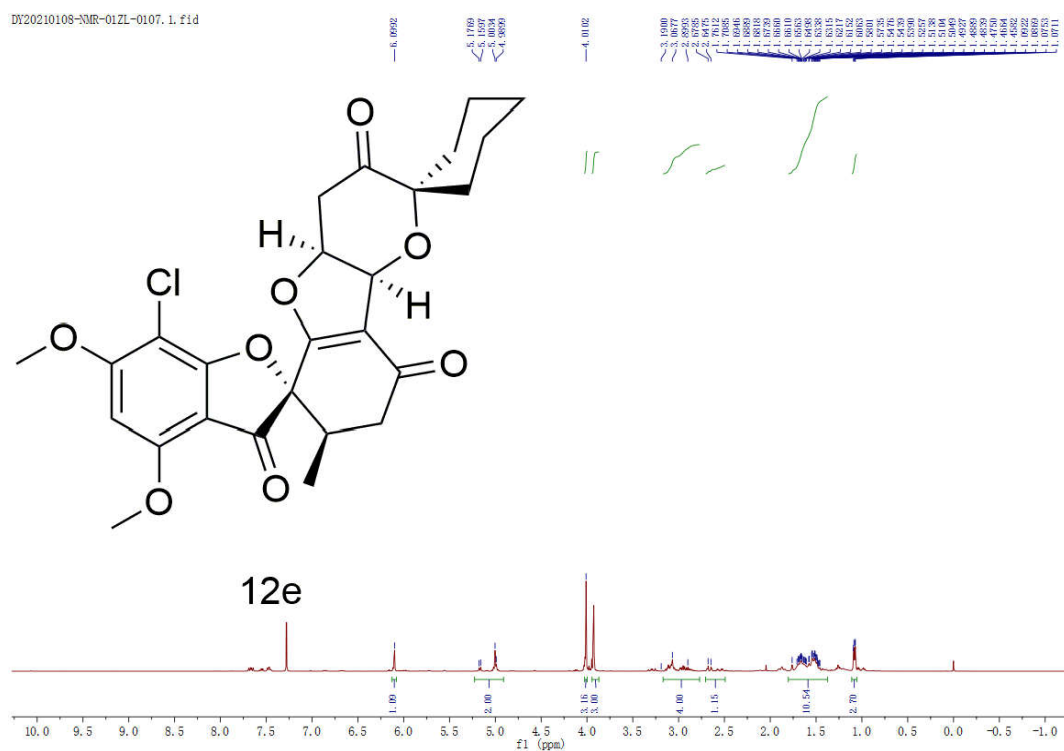

$^1\text{H}$  NMR spectrum of 12e (400 MHz,  $\text{CDCl}_3$ )

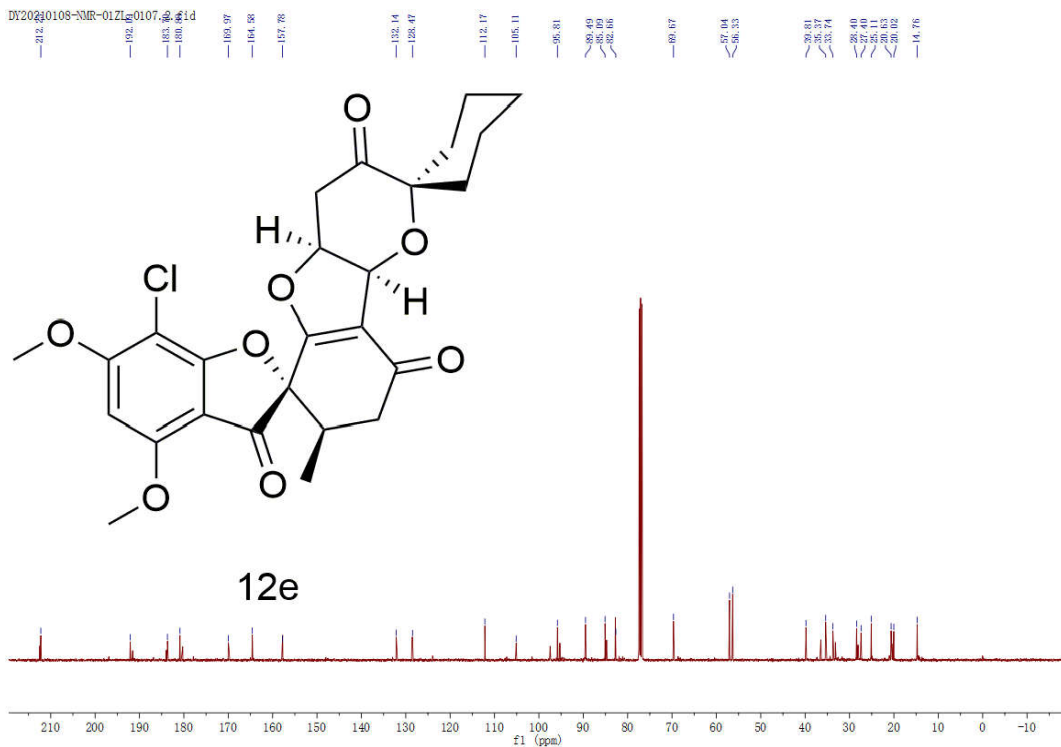

$^{13}\text{C}$  NMR spectrum of 12e (100 MHz,  $\text{CDCl}_3$ )

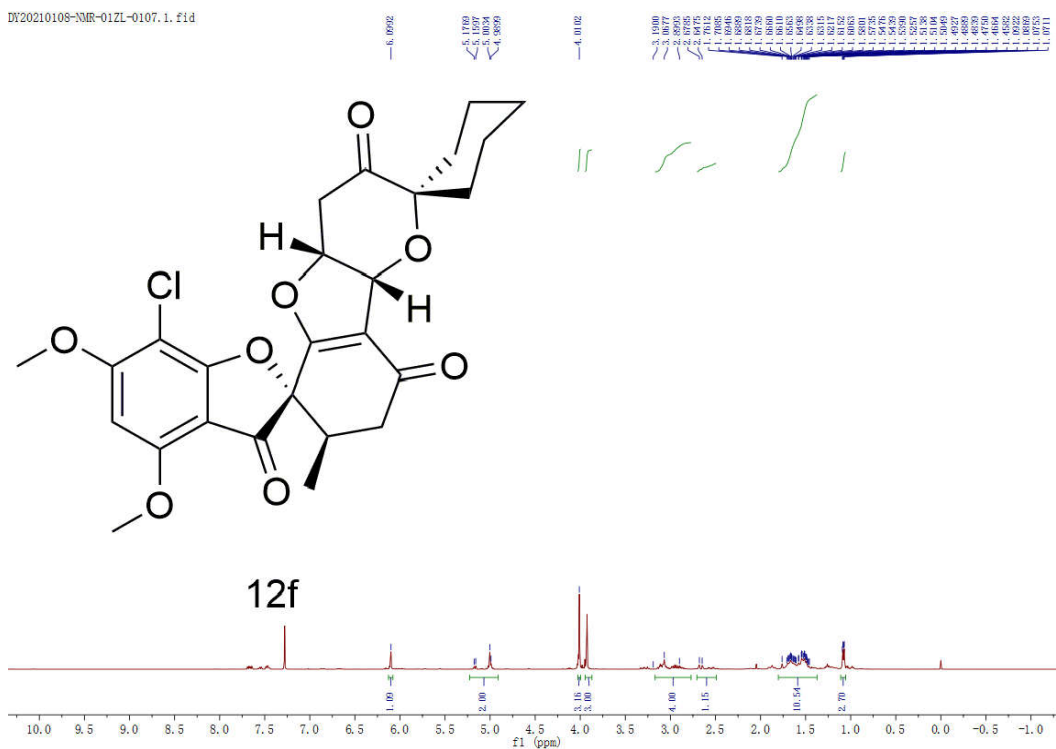

$^1\text{H}$  NMR spectrum of 12f (400 MHz,  $\text{CDCl}_3$ )



20210618FC0012ZL-16.1.fid

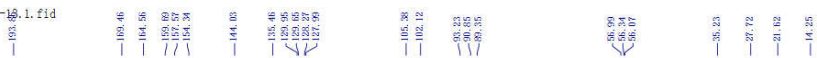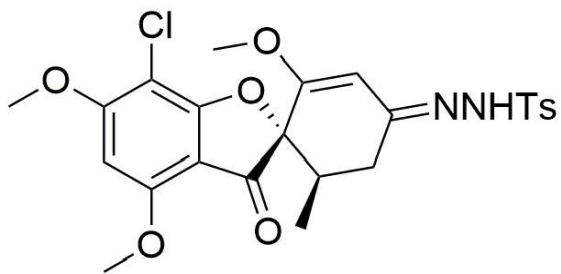

13

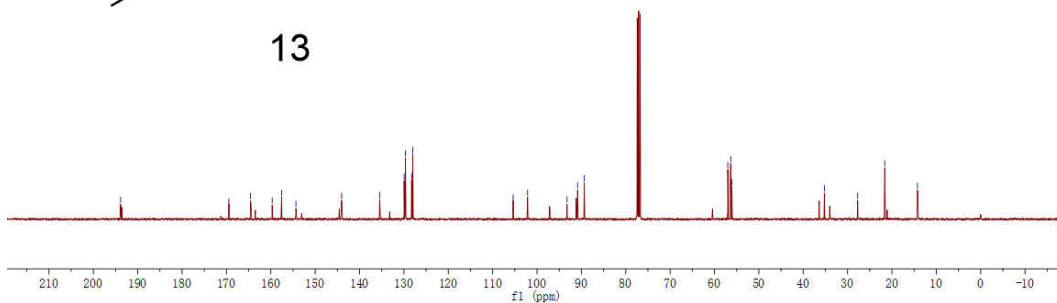

### $^{13}\text{C}$ NMR spectrum of 13 (100 MHz, $\text{CDCl}_3$ )

DV20210414-NMR-01ZL-0413-01.1.fid

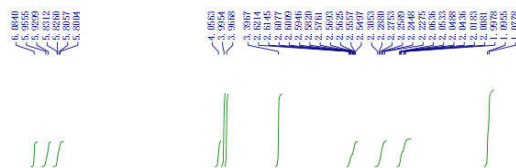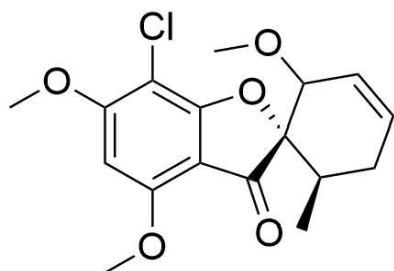

14

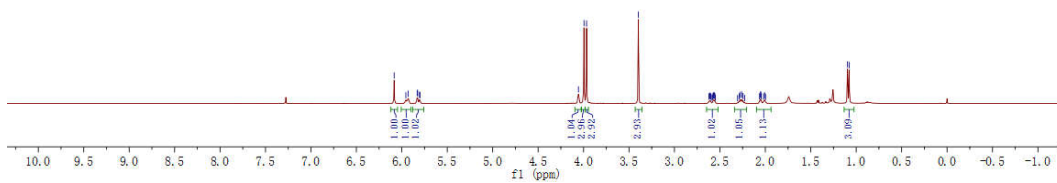

### $^1\text{H}$ NMR spectrum of 14 (400 MHz, $\text{CDCl}_3$ )





DY20210423-NMR-01ZL-0423, 2, f1d

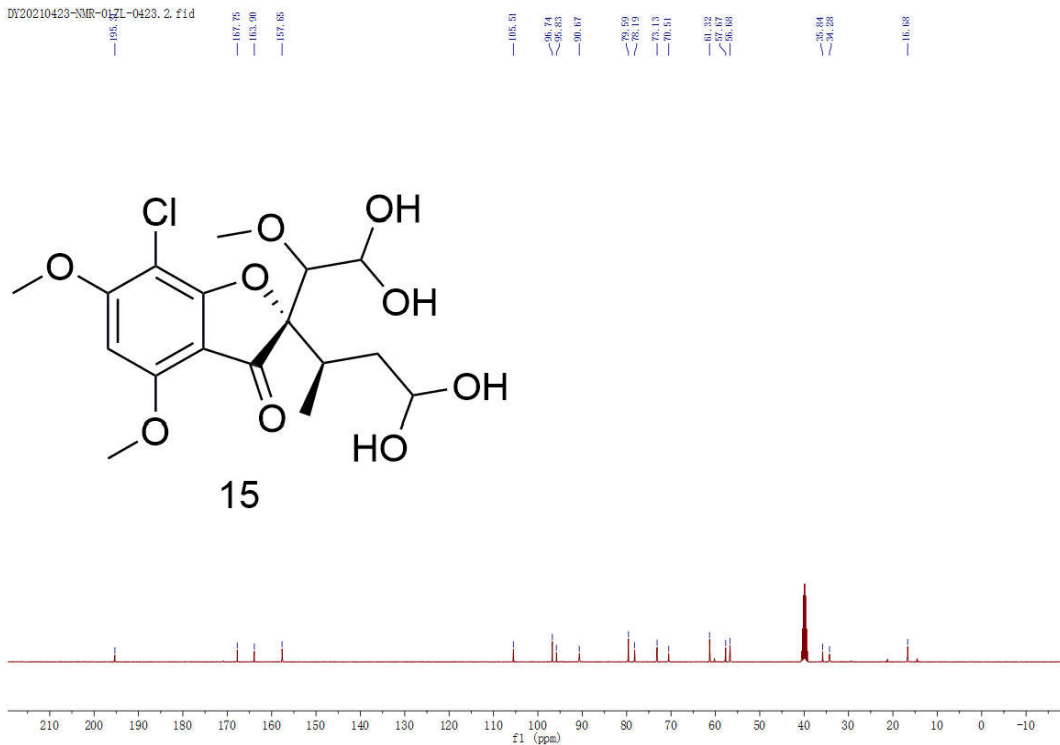

<sup>13</sup>C NMR spectrum of 15 (100 MHz, DMSO-*d*<sub>6</sub>)

**Table 1 Crystal data and structure refinement for 8b.**

|                                             |                                                                 |
|---------------------------------------------|-----------------------------------------------------------------|
| Identification code                         | 8b                                                              |
| Empirical formula                           | C <sub>20</sub> H <sub>23</sub> ClN <sub>4</sub> O <sub>5</sub> |
| Formula weight                              | 434.87                                                          |
| Temperature/K                               | 169.99(10)                                                      |
| Crystal system                              | triclinic                                                       |
| Space group                                 | P1                                                              |
| a/Å                                         | 10.9389(16)                                                     |
| b/Å                                         | 12.8371(12)                                                     |
| c/Å                                         | 16.8588(12)                                                     |
| $\alpha$ /°                                 | 67.975(8)                                                       |
| $\beta$ /°                                  | 82.641(10)                                                      |
| $\gamma$ /°                                 | 76.510(11)                                                      |
| Volume/Å <sup>3</sup>                       | 2131.9(4)                                                       |
| Z                                           | 4                                                               |
| $\rho_{\text{calc}}/\text{g/cm}^3$          | 1.355                                                           |
| $\mu/\text{mm}^{-1}$                        | 0.218                                                           |
| F(000)                                      | 912.0                                                           |
| Crystal size/mm <sup>3</sup>                | 0.13 × 0.1 × 0.08                                               |
| Radiation                                   | Mo K $\alpha$ ( $\lambda$ = 0.71073)                            |
| 2 $\Theta$ range for data collection/°      | 4.538 to 49.994                                                 |
| Index ranges                                | -13 ≤ h ≤ 12, -15 ≤ k ≤ 15, -20 ≤ l ≤ 19                        |
| Reflections collected                       | 11290                                                           |
| Independent reflections                     | 11290 [ $R_{\text{int}}$ = 0.0876, $R_{\text{sigma}}$ = 0.1352] |
| Data/restraints/parameters                  | 11290/61/1098                                                   |
| Goodness-of-fit on F <sup>2</sup>           | 1.050                                                           |
| Final R indexes [ $I \geq 2\sigma(I)$ ]     | $R_1$ = 0.1109, $wR_2$ = 0.2956                                 |
| Final R indexes [all data]                  | $R_1$ = 0.1326, $wR_2$ = 0.3245                                 |
| Largest diff. peak/hole / e Å <sup>-3</sup> | 1.29/-0.68                                                      |
| Flack parameter                             | 0.05(10)                                                        |

**Crystal structure determination of compound 8b**

Crystallographic data for the structure have been deposited with the Cambridge Crystallographic Data Centre as CCDC no. CCDC-2107148. Copies of the data can be obtained, free of charge, on application to CHGC, 12 Union Road, Cambridge CB2 1EZ, UK (fax: +44 1223 336033 or email: deposit@ccdc.cam.ac.uk).

**Crystal Data** for C<sub>20</sub>H<sub>23</sub>ClN<sub>4</sub>O<sub>5</sub> ( $M$  = 434.87 g/mol): triclinic, space group P1 (no. 1),  $a$  = 10.9389(16) Å,  $b$  = 12.8371(12) Å,  $c$  = 16.8588(12) Å,  $\alpha$  = 67.975(8)°,  $\beta$  =

$82.641(10)^\circ$ ,  $\gamma = 76.510(11)^\circ$ ,  $V = 2131.9(4) \text{ \AA}^3$ ,  $Z = 4$ ,  $T = 169.99(10) \text{ K}$ ,  $\mu(\text{Mo K}\alpha) = 0.218 \text{ mm}^{-1}$ ,  $D_{\text{calc}} = 1.355 \text{ g/cm}^3$ , 11290 reflections measured ( $4.538^\circ \leq 2\theta \leq 49.994^\circ$ ), 11290 unique ( $R_{\text{int}} = 0.0876$ ,  $R_{\text{sigma}} = 0.1352$ ) which were used in all calculations. The final  $R_1$  was 0.1109 ( $I > 2\sigma(I)$ ) and  $wR_2$  was 0.3245 (all data).

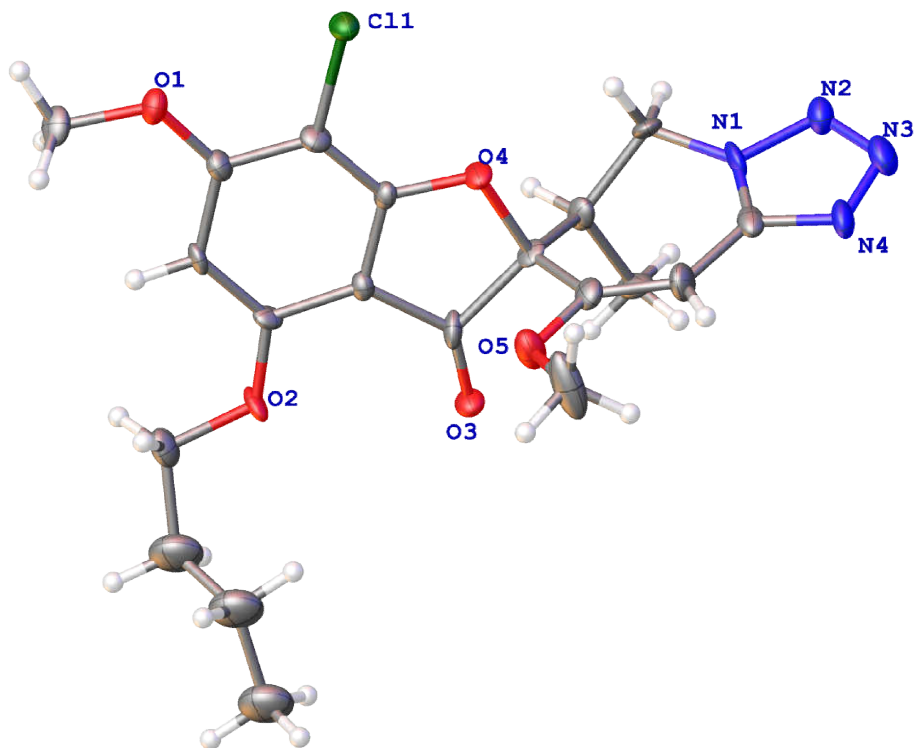

## References

- (1) Yu, J. X.; Ma, H. C.; Yao, H. L.; Cheng, H.; Tong, R. B., Diastereoselective and regiodivergent oxa-[3+2] cycloaddition of Achmatowicz products and cyclic 1,3-dicarbonyl compounds. *Org Chem Front* **2016**, *3*, 714-719.
- (2) Lu, Y. P.; Wang, L.; Wang, X. Y.; Yuan, H. L.; Zhao, Y., Divergent de novo synthesis of 2,4,5-trideoxyhexopyranosides derivatives of podophyllotoxin as anticancer agents. *Future Med Chem* **2019**, *11*, 3015-3027.
- (3) Song, W. Z.; Zhao, Y.; Lynch, J. C.; Kim, H.; Tang, W. P., Divergent de novo synthesis of all eight stereoisomers of 2,3,6-trideoxyhexopyranosides and their oligomers. *Chem Commun* **2015**, *51*, 17475-17478.
- (4) Kasare, S.; Bankar, S. K.; Ramasastry, S. S. V., Expedient Metal-Free Access to Functionalized Polycyclic Acetals under Mild Aqueous Conditions. *Org Lett* **2014**, *16*, 4284-4287.
- (5) Wang, H. Y.; Yang, K.; Yin, D.; Liu, C.; Glazier, D. A.; Tang, W. P., Chiral Catalyst-Directed Dynamic Kinetic Diastereoselective Acylation of Lactols for De Novo Synthesis of Carbohydrate. *Org Lett* **2015**, *17*, 5272-5275.
